# Supplementary material for: Microgravity Induces Changes in Microsome-Associated Proteins of Arabidopsis Seedlings Grown on Board the International Space Station
Source: PubMed Central journal article supplement (PMC3950288; doi:10.1371/journal.pone.0091814), 2014-03-11
Supplement: pone.0091814.s010.pdf [file pone.0091814.s010.pdf]

| UNIPROT | TAIR        | Number of quantified peptides | PEPTIDES                                                                                 | DESCRIPTION                                                 | Ratio Og/1g space | Ratio Og/1g ground | Ratio 1g space/1g ground* | P value Og/1g | P value Og/1g | P value 1g space/1g ground** |
|---------|-------------|-------------------------------|------------------------------------------------------------------------------------------|-------------------------------------------------------------|-------------------|--------------------|---------------------------|---------------|---------------|------------------------------|
| Q9L80   | AT3G14415.3 | 2                             | IILDVNK,VPVFLDGGVR,DIWLQTTINMPLVK,IDMATTVLGFK                                            | (5)-2-hydroxy-acid oxidase                                  | 0,7108            | 0,6723             | 0,98226                   | 0,12853533    | 0,05815837    | 0,30423363                   |
| P15455  | AT5G44120.3 | 12                            | GQRPEEEEEGR,CSGVSFAR,GLYPSFFNTAK,VIPGCAETFDQSSSEFQRP,IDLQTAQQLQNDQDNR,CTD                | 12S seed storage protein CRU4                               | 0,71078           | 0,91158            | 1,2799                    | 0,12549222    | 0,43085806    | 0,12852101                   |
| P42643  | AT4G09000.1 | 1                             | EAPAAAKPADEQSS                                                                           | 14-3-3-like protein GF14 chi                                | 0,88536           | 0,60562            | 0,71477                   | 0,31567926    | 0,05672548    | 0,11672133                   |
| P48347  | AT1G23200.1 | 4                             | VCDNLIDLVK,AAVAAAENGLAPTHPR,EAADQSELEAK,QAFDDAIEALDSNEESYK                               | 14-3-3-like protein GF14 epsilon                            | 1,3677            | 0,85347            | 0,67668                   | 0,23930232    | 0,41661672    | 0,20293002                   |
| P48348  | AT5G65430.1 | 1                             | AAQDVAVADLAPTHPR                                                                         | 14-3-3-like protein GF14 kappa                              | 1,05              | 0,83001            | 0,79172                   | 0,40976466    | 0,21561358    | 0,19894185                   |
| P48349  | AT5G10450.1 | 1                             | LLDSHLIPAGASAESEK                                                                        | 14-3-3-like protein GF14 lambda                             | 1,3355            | 0,98837            | 0,74006                   | 0,13687527    | 0,46478545    | 0,12424607                   |
| Q96299  | AT2G42590.1 | 1                             | AYEIAATAEAK                                                                              | 14-3-3-like protein GF14 mu                                 | 1,1811            | 0,67759            | 0,5934                    | 0,32110536    | 0,07487734    | 0,06697837                   |
| Q96300  | AT3G02520.1 | 1                             | TVDTDELTVFER                                                                             | 14-3-3-like protein GF14 nu                                 | 1,02              | 1,3764             | 1,3373                    | 0,45449884    | 0,09995659    | 0,13180052                   |
| Q01525  | AT1G78300.1 | 3                             | VSAAVDGDDELTVFER,GNDHDVHTAIR,SAQDIANAELAPTHPR                                            | 14-3-3-like protein GF14 omega                              | 1,1963            | 0,73555            | 0,6319                    | 0,29291621    | 0,12232474    | 0,08876987                   |
| P46077  | AT1G3160.1  | 1                             | GNDHDVHTIR                                                                               | 14-3-3-like protein GF14 phi                                | 1,0097            | 0,85005            | 0,84192                   | 0,47480938    | 0,20011661    | 0,21523942                   |
| P42644  | AT5G38480.1 | 2                             | QAFDDAIEALDGLGSEESYK,SASDIATAELAPTHPR,ICDGLINLVAHLIPLSPASPAESK                           | 14-3-3-like protein GF14 psi                                | 1,3422            | 1,0344             | 0,80809                   | 0,23526536    | 0,24920493    | 0,41886759                   |
| P42645  | AT5G16050.1 | 1                             | ICDGLINLVAHLIPLSPASPAESK                                                                 | 14-3-3-like protein GF14 upsilon                            | 0,71787           | 0,88912            | 1,2386                    | 0,11867247    | 0,25867952    | 0,17419534                   |
| Q95226  | AT4G38690.1 | 2                             | VICVWKP,R,DNWIDTDLSPK                                                                    | 1-phosphatidylinositol phosphodiesterase-related protein    | 0,88802           | 0,49177            | 0,55378                   | 0,28627108    | 0,01421162    | 0,03648279                   |
| Q39227  | AT1G20330.1 | 1                             | LEEVYAEIYR,ANVGITINEYQVNR,AYVIDAETAK,ILDVGGVGGPMPR                                       | 24-methylenesterol C-methyltransferase 2                    | 1,092             | 1,5556             | 1,4246                    | 0,32793817    | 0,04919945    | 0,09913203                   |
| Q0WQ06  | AT5G23540.1 | 2                             | AVAVVVDPIQSVK,AGVPMVEMGLMLGEFVDEYTVR                                                     | 26S proteasome non-ATPase regulatory subunit 14             | 0,88701           | 2,0787             | 2,3435                    | 0,28530327    | 0,01280421    | 0,01457109                   |
| Q95GW3  | AT1G64520.1 | 1                             | FTSLPFLFENSFNAAK,IPOSQFENLNLGNLRL                                                        | 26S proteasome non-ATPase regulatory subunit RPN12A         | 1,1152            | 1,3931             | 1,2478                    | 0,30160883    | 0,12365761    | 0,2368466                    |
| Q8W4H4  |             | 2                             | VYDVSVGGQIAPDNNIGR,FIADAVASLPK                                                           | 26S proteasome regulatory subunit                           | 0,85626           | 1,1334             | 1,3237                    | 0,23819306    | 0,24627457    | 0,13309988                   |
| Q95VW2  | AT2G20580.1 | 2                             | QMLAATFVAFVFNAGFGQDK,VIPLSLPEGFIILK                                                      | 26S proteasome regulatory subunit N1                        | 0,83217           | 0,78704            | 1,1284                    | 0,1463643     | 0,06266646    | 0,27044119                   |
| Q6EM86  | AT1G20200.1 | 1                             | LTGESSLDFALVPSSEASLR                                                                     | 26S proteasome regulatory subunit N3                        | 0,74346           | 1,6479             | 2,2165                    | 0,13337707    | 0,03674982    | 0,01836847                   |
| Q6EM85  | AT4G24820.2 | 3                             | AFGVSVDFIDQELSR,VVDAPEILLTVLQK,SEGLDFVIR,ADAAENGLSESEVR                                  | 26S proteasome regulatory subunit N7                        | 1,0737            | 1,2771             | 1,2329                    | 0,35129763    | 0,17947472    | 0,14540456                   |
| Q24112  | AT5G05780.1 | 2                             | AEDSKVPAIPATS,VVHVPLVLSVVDHYNR                                                           | 26S proteasome regulatory subunit N8                        | 0,76326           | 1,4286             | 1,8717                    | 0,1468236     | 0,0757436     | 0,03254768                   |
| Q6XJ68  | AT4G28470.1 | 1                             | YIPLSILEGFVILK                                                                           | 26S proteasome regulatory subunit S2 1B                     | 0,73062           | 1,5469             | 2,1173                    | 0,1258008     | 0,05048437    | 0,02060502                   |
| Q6XJ64  |             | 4                             | VEIAHIEALIGLIDHVEK,EYVEALALLSTLVK,LRPFSSLPK,LAALLMENEK                                   | 26S proteasome subunit RPN6a                                | 3,6768            | 1,0236             | 0,96251                   | 0,06347689    | 0,49686901    | 0,05897559                   |
| Q96291  | AT3G11630.1 | 3                             | SFVGLIHDQGIAR,LQALQYIQENPDVCPAGWKGK,SGGLDNLVPLISDVK                                      | 2-Cys peroxiredoxin BAS1                                    | 1,0295            | 1,0699             | 1,022                     | 0,29028546    | 0,18721117    | 0,37115731                   |
| Q95QJ8  | AT3G25860.1 | 6                             | AAGMALAQHPVNVNASC,ITASDVEETAGIAPSK,LDLILSQ,VIYGADLAAFLQTFAK,NMIESLSPVTPFR                | 2-oxoacid dehydrogenases acyltransferase family protein     | 0,82153           | 0,93345            | 1,1517                    | 0,16183983    | 0,38681559    | 0,18121507                   |
| Q9M2T8  |             | 3                             | LLECGVESQDIDR,LAWSTOFENLQYK,HPHSTLQIYHK                                                  | 2-oxoglutarate dehydrogenase, E1 subunit-like protein       | 1,0249            | 1,6447             | 1,6047                    | 0,43991914    | 0,03695908    | 0,06026399                   |
| Q95MU8  | AT3G49120.1 | 5                             | NQCQFIDLR,NVGLDRSPDLVSLGSDTFFGK,ETIVNELR,TVSCADMLTIAQQSVTLVGGPSWR,SALVDFD                | peroxidase 34                                               | 7,3136            | 8,6168             | 1,1782                    | 9,40E-05      | 8,34E-06      | 0,22475865                   |
| Q9ASV6  | AT3G15190.1 | 1                             | LIGEAYSIDK                                                                               | 30S ribosomal protein S20                                   | 1,0322            | 0,95883            | 0,92894                   | 0,4245653     | 0,38748556    | 0,3468915                    |
| Q9XJ27  | AT1G74970.1 | 4                             | VPLVTLGVENSDFIVK,EYLGQNLPLWLQYVK,AHGGLSGQQAQITLQVGR                                      | 30S ribosomal protein S9                                    | 1,0076            | 1,0764             | 1,0682                    | 0,48028519    | 0,32482596    | 0,36005984                   |
| AX9XU2  | AT2G43420.1 | 1                             | LVLVYFSLK                                                                                | 3beta-hydroxysteroid dehydrogenase/decarboxylase isomorph 3 | 1,2878            | 1,3822             | 1,0734                    | 0,15784004    | 0,08954494    | 0,35110449                   |
| Q9C920  | AT1G53000.1 | 1                             | ALQVTPDAVFSTAVTSLKPEDGLDQYK                                                              | 3-deoxy-manno-oxulosonate cyclidyltransferase [CMP-KDO sy   | 0,6064            | 0,73179            | 1,2068                    | 0,05897859    | 0,09424463    | 0,19895015                   |
| Q8VZB2  | AT5G10480.1 | 1                             | YSFYFK                                                                                   | 3-hydroxyacyl-CoA dehydratase PASTICCINO 2                  | 0,78486           | 0,7993             | 1,0184                    | 0,16588096    | 0,14483867    | 0,45282473                   |
| Q9LKJ1  | AT5G65940.1 | 1                             | TVEEISALER                                                                               | 3-hydroxyisobutyryl-CoA hydrolase 1                         | 1,1964            | 1,7598             | 1,4709                    | 0,21738085    | 0,026391      | 0,08506395                   |
| Q9ZU20  | AT2G46720.1 | 1                             | VWQLAFGGSK                                                                               | 3-ketoacyl-CoA synthase 13                                  | 0,87368           | 1,0205             | 1,1681                    | 0,26346102    | 0,44164823    | 0,23397099                   |
| Q56WD9  | AT2G33150.1 | 7                             | GLPVLGVFR,QEQQDQAAVDSHR,TGDEKPTVSVDDGIRPTTLASLQK,DTYPDDLLAPVLR,TNLNPEVGD <sup>1</sup>    | 3-ketoacyl-CoA Thiolase 2                                   | 1,6412            | 1,9819             | 1,3263                    | 0,12161525    | 0,00367439    | 0,02777367                   |
| P33207  | AT1G24360.1 | 6                             | ILGTPILGR,WGTDVNVNNAAGITR,VEPSPVITGASR,VLVNYAR,QIEYGGQAITFGDGVK,IIINISVGLIG <sup>1</sup> | 3-oxoacyl-[acyl-carrier-protein] reductase                  | 1,6022            | 1,8407             | 1,3201                    | 0,22774775    | 0,00787023    | 0,0277367                    |
| P52410  | AT5G4260.1  | 3                             | ALESANLGGDK,AGVLVGTGMGGLTVFSEGVGNLQEK,LLNSESIGSIDR                                       | 3-oxoacyl-[acyl-carrier-protein] synthase I                 | 0,92834           | 0,61783            | 0,92834                   | 0,172787      | 0,03690382    | 0,14132648                   |
| Q9SIE3  | AT2G22230.1 | 2                             | FPAPFTVMINDIQR,VIETPVGSAVAK                                                              | 3R-hydroxymyristoyl ACP dehydrase                           | 1,7672            | 3,0398             | 1,7202                    | 0,04574243    | 0,00249169    | 0,04547361                   |
| Q9LX13  | AT5G10610.1 | 3                             | YEAFTVMINDINK,SFFFFAGIDK,VIETYAGVSAVAK                                                   | 3R-hydroxymyristoyl ACP dehydrase                           | 1,6295            | 2,1996             | 1,3498                    | 0,06099168    | 0,01030389    | 0,12443244                   |
| P16181  | AT3G48930.1 | 2                             | FNVLK,ILAGTCHSAK                                                                         | 40S ribosomal protein S11-1                                 | 1,5438            | 1,4938             | 1,108                     | 0,26346102    | 0,23380176    | 0,13747223                   |
| P42733  | AT5G23740.1 | 1                             | EADGAYIDSK                                                                               | 40S ribosomal protein S11-3                                 | 1,1209            | 2,0109             | 1,794                     | 0,29291621    | 0,0148253     | 0,03772105                   |
| Q959P1  | AT1G15930.1 | 2                             | VAQLVLAEDCNQPDYVK,DFGEETLALSVNK                                                          | 40S ribosomal protein S12-1                                 | 1,2622            | 1,6658             | 1,3513                    | 0,22213442    | 0,01738877    | 0,05552429                   |
| Q9SK23  | AT2G32060.3 | 3                             | VVGCSSLVIK,NAQLCVLAEDCNQPDYVK,DFGEETLALSVNK                                              | 40S ribosomal protein S12-2                                 | 0,6544            | 1,2999             | 1,9864                    | 0,08067319    | 0,12167154    | 0,02666429                   |
| P59224  | AT4G00100.1 | 2                             | GLTPSQGLVLR,LLVLSER                                                                      | 40S ribosomal protein S13-2                                 | 0,80416           | 0,76148            | 1,0026                    | 0,10907499    | 0,10861875    | 0,35101078                   |
| Q95H0   | AT2G36160.1 | 1                             | VDVVTLGPVSR                                                                              | 40S ribosomal protein S14-1                                 | 0,8316            | 1,1061             | 1,3301                    | 0,21328864    | 0,2808519     | 0,13050741                   |
| Q9CAX6  | AT3G11510.1 | 2                             | IEDVTPIDTSTR,VETVTLGPVSR,TPGGAQSALR                                                      | 40S ribosomal protein S14-2                                 | 0,95331           | 1,1762             | 1,2453                    | 0,30754911    | 0,32903377    | 0,21316325                   |
| P42036  | AT3G52580.1 | 1                             | TPGPGAGSALR,VENVTLGPVSR                                                                  | 40S ribosomal protein S14-3                                 | 0,84551           | 1,0769             | 1,3699                    | 0,2218635     | 0,38756356    | 0,17419534                   |
| Q2V4R0  | AT1G04270.2 | 1                             | EAPQGEKPEPFR                                                                             | 40S ribosomal protein S15-1                                 | 0,9208            | 1,2783             | 1,4258                    | 0,29409355    | 0,13077783    | 0,09745137                   |
| Q9F164  | AT5G09510.1 | 1                             | EAPAGEKPEPFR                                                                             | 40S ribosomal protein S15-4                                 | 0,74316           | 1,1065             | 1,4889                    | 0,13337707    | 0,28048336    | 0,08149266                   |
| P42798  | AT5G59850.1 | 2                             | HGYGEEFYVDHRR,ISVLDNALK,EIEGWATAR                                                        | 40S ribosomal protein S15a-1                                | 1,3343            | 1,6244             | 1,6343                    | 0,45831573    | 0,09593216    | 0,11267335                   |
| Q9SK22  | AT2G09990.1 | 1                             | IFEPILLGK                                                                                | 40S ribosomal protein S16-1                                 | 1,096             | 1,2967             | 1,1878                    | 0,31685402    | 0,30839936    | 0,20968388                   |
| Q42340  | AT5G18380.1 | 1                             | IFEPVLLGK                                                                                | 40S ribosomal protein S16-3                                 | 1,0172            | 0,95563            | 0,93951                   | 0,45776795    | 0,38074277    | 0,36664065                   |
| Q9S021  | AT3G10610.1 | 1                             | ILEEVNIPSK                                                                               | 40S ribosomal protein S17-3                                 | 1,332             | 1,8846             | 1,4149                    | 0,13889133    | 0,01923293    | 0,10264234                   |
| Q5PNZ9  | AT4G09800.1 | 4                             | YSQVSNALDMK,IPDWFLNR,IMFALTSIK,AGELSAEIDNLMITVANPR,VLNTNVQDK                             | 40S ribosomal protein S18                                   | 0,88166           | 1,1122             | 1,3068                    | 0,20935831    | 0,26037722    | 0,12230716                   |
| Q9FNP8  | AT5G61170.1 | 1                             | IELPLWTDVTK                                                                              | 40S ribosomal protein S19-3                                 | 0,83479           | 0,93133            | 1,1142                    | 0,21322366    | 0,31921491    | 0,2908149                    |
| Q8H189  |             | 1                             | VIDLFSPPDVVK                                                                             | 40S ribosomal protein S20                                   | 0,76081           | 1,2576             | 1,6529                    | 0,14551713    | 0,14137613    | 0,05407754                   |
| P49200  | AT5G62300.2 | 1                             | VIDLFSPPDVVK                                                                             | 40S ribosomal protein S20-1                                 | 0,9563            | 0,78714            | 0,82311                   | 0,39968787    | 0,13401989    | 0,191671                     |
| P49688  | AT2G41840.1 | 3                             | TYGLTFPEFWK,LSVVPVLR,VLQFAGIDVFTSSR,SPYQEHDFLASK,QIEQIYHLSLPVK,EYQIDMLIGPTLK,            | 40S ribosomal protein S2-3                                  | 0,9914            | 1,2171             | 1,2993                    | 0,32843915    | 0,14192721    | 0,11725341                   |
| P49201  | AT5G02960.1 | 2                             | IGIEAK,VSGVSLALFK                                                                        | 40S ribosomal protein S23-2                                 | 1,0781            | 1,0067             | 0,96229                   | 0,3847187     | 0,36216877    | 0,49515082                   |
| Q95517  | AT3G04920.1 | 2                             | SSFGGLVDTVESAK,DPNAIFVK                                                                  | 40S ribosomal protein S24-1                                 | 0,93255           | 0,98567            | 1,0582                    | 0,29576483    | 0,45807104    | 0,30776669                   |
| P49206  | AT2G40590.1 | 3                             | GHVNPVIR,NIVEQAAR,DVQEAASYEGYTLFK                                                        | 40S ribosomal protein S26-1                                 | 0,89045           | 0,81803            | 1,0308                    | 0,09196159    | 0,13190576    | 0,235938                     |
| Q95R73  | AT5G03850.1 | 1                             | EGDILTLESER                                                                              | 40S ribosomal protein S28-1                                 | 1,1971            | 0,89559            | 0,74811                   | 0,21721359    | 0,26763162    | 0,12852101                   |
| Q95IP7  | AT2G31610.1 | 1                             | TPLDVVIHAPK                                                                              | 40S ribosomal protein S3-1                                  | 0,85458           | 1,5526             | 1,8168                    | 0,23630779    | 0,04945274    | 0,03615671                   |
| Q9M339  | AT3G53870.1 | 2                             | EYDLSAVR,VMLDWDPK                                                                        | 40S ribosomal protein S3-2                                  | 0,85906           | 1,6148             | 1,8797                    | 0,24130467    | 0,04112409    | 0,03225315                   |
| Q9CAV0  | AT3G04840.1 | 2                             | LFCIAFTK,TTDSYTLR                                                                        | 40S ribosomal protein S3a-1                                 | 1,1535            | 1,886              | 1,7186                    | 0,21902323    | 0,0184179     | 0,05965669                   |
| Q42262  | AT4G34670.1 | 1                             | TTDGYTLR                                                                                 | 40S ribosomal protein S3a-2                                 | 1,1393            | 1,6991             | 1,5223                    | 0,19262079    | 0,01878338    | 0,06924373                   |
| P49204  | AT5G07090.1 | 5                             |                                                                                          | 40S ribosomal protein S4-2                                  | 1,0824            | 1,4237             | 1,34                      | 0,29525989    | 0,30557396    | 0,18997493                   |
| Q48549  | AT4G31700.1 | 1                             | ISQEVSGDALGEEFK                                                                          | 40S ribosomal protein S6-1                                  | 0,89676           | 0,94823            | 1,162                     | 0,10212603    | 0,20834825    | 0,17307293                   |
| P51430  | AT5G10360.1 | 1                             | LSQEVSGDALGEEFK                                                                          | 40S ribosomal protein S6-2                                  | 0,89676           | 0,94823            | 1,162                     | 0,10212603    | 0,20834825    | 0,17307293                   |
| Q9M885  | AT3G02560.2 | 4                             | AVVIVVPR,GVAPTFEEQYQALFDLENTNQLK                                                         | 40S ribosomal protein S7-2                                  | 0,92662           | 0,78566            | 0,85919                   | 0,36636313    | 0,24563713    | 0,36723285                   |
| Q93VG5  | AT5G02090.1 | 7                             | VLDVYVNASNNELVR,DGEEGEEAAVAPEEVK,ADGYVLEK,SLDSHIEDQFASGR,LDTGNYSWGSEATTR,                | 40S ribosomal protein S8-1                                  | 1,0484            | 1,3184             | 1,2655                    | 0,34220693    | 0,026391      | 0,05756286                   |
| Q9LXG1  | AT5G15200.1 | 2                             | VQYSLSR,YGLDESONK,IFEFEALLR                                                              | 40S ribosomal protein S9-1                                  | 1,2712            | 1,5036             | 1,2458                    | 0,33405095    | 0,07196559    | 0,1311499                    |
| Q08682  | AT1G72370.1 | 6                             | LLIUTDPR,FAQYTGANAAGR,EGALGNIPHAFCDTSPMR,HISGLFWLLAR,FVDGIPANNK,MMCAAEVI                 | 40S ribosomal protein Sa-1                                  | 0,97172           | 1,2942             | 1,358                     | 0,3146579     | 0,02479861    | 0,02760656                   |
| Q9LF93  |             | 1                             | VFNQDLYFK                                                                                | pyruvate kinase-like protein                                |                   |                    |                           |               |               |                              |

|         |             |    |                                                                               |                                                                |         |         |         |            |            |            |
|---------|-------------|----|-------------------------------------------------------------------------------|----------------------------------------------------------------|---------|---------|---------|------------|------------|------------|
| O50008  | ATS617920.2 | 12 | IPSESEIADR,WFDNTYHYIVPELGVNFVYASHK,ALGVDTVPVLPVGVPSYLLSK,SEFLLSLKP,NIWANDF/   | 5-methyltetrahydropteroylglutamate-homocysteine methyltr       | 1,0596  | 1,4192  | 1,3204  | 0,42619086 | 0,26070743 | 0,2423675  |
| Q42112  | AT3G09200.1 | 4  | VGLVAPIDVVVPPQNTGLDPSQTSFQVLNPIK,ISENTGNTAILNLLQLQGNVGLFTK,NALAIAVATEY/       | 60S acidic ribosomal protein P0-2                              | 1,033   | 0,94602 | 0,9145  | 0,25045    | 0,37566743 | 0,30784206 |
| P57691  | AT3G11250.1 | 3  | NALAIAVATDYTPQAEK,ISENSGNTAILNLLQLQGNVGLFTK,FVVAASADAGGGSQAQAGAAK             | 60S acidic ribosomal protein P0-3                              | 0,96868 | 1,314   | 1,5368  | 0,11399376 | 0,14912661 | 0,04132934 |
| Q8LEQ0  | ATS647700.2 | 2  | AAGVTIYVWMLFAK,NVTDLIMNVAGGGGGPAAAAAAGGGGAAAPAAAEK                            | 60S acidic ribosomal protein P1-3                              | 1,9187  | 2,83    | 2,2499  | 0,05945217 | 0,012231   | 0,15355836 |
| P51407  | AT2G27720.1 | 3  | LASVPSSGGGGVAVASATSGGGGGGAPAAESK,VVAALVLVLSGK                                 | 60S acidic ribosomal protein P2-1                              | 1,1251  | 1,431   | 1,4325  | 0,2962133  | 0,03851025 | 0,08836971 |
| B9DGN3  | AT2G27710.3 | 3  | TILSGVGAETSDSEIQLL,LSVSPSSGGGGVAVASATSGGGGGGASAAESK,VVAALVLVLSGK              | 60S acidic ribosomal protein P2-2                              | 1,4365  | 2,1477  | 1,8225  | 0,24031994 | 0,01057178 | 0,03254768 |
| B3H4N7  | ATS657290.3 | 3  | GVFSFVCK,QHEGDLEASSTYDLQR                                                     | 60S acidic ribosomal protein P3-2                              | 1,2599  | 1,7919  | 1,5467  | 0,2523643  | 0,02366639 | 0,0680739  |
| Q93VT9  | AT1G14320.1 | 2  | ENVSSEALEAAR,DAHGHHAQEAEL,VAIGQVLLSVR                                         | 60S ribosomal protein L10-1                                    | 1,2162  | 1,5361  | 1,339   | 0,09380015 | 0,06538476 | 0,48313394 |
| Q8VZB9  | AT8G8360.1  | 1  | EAITTTGK,NFVETIEIQGLK                                                         | 60S ribosomal protein L10a-1                                   | 1,0014  | 1,1865  | 1,5769  | 0,16588096 | 0,18098215 | 0,07439308 |
| P59230  | AT2G27530.2 | 3  | FPTLVSHQESLEAK,NFVETIEIQGLK                                                   | 60S ribosomal protein L10a-2                                   | 1,332   | 1,8984  | 1,791   | 0,42810099 | 0,01649625 | 0,02474665 |
| Q0WQZ1  | AT2G42740.1 | 4  | VLEQLSGQTPVFSK,AMQLLESGLK,VEGVILNK,IACVTVTR                                   | 60S ribosomal protein L11-1                                    | 1,0878  | 1,4658  | 1,3652  | 0,30758306 | 0,20850578 | 0,14531303 |
| Q0WVW72 | AT3G53430.1 | 4  | EILGTCSVGVCTVDGK,HNGNISFDDVTEIAR,VTVVPSAAALVIK                                | 60S ribosomal protein L12-2                                    | 1,0104  | 1,4276  | 1,5101  | 0,42004279 | 0,17988632 | 0,2413593  |
| P41127  | AT3G49010.3 | 4  | AGDSTPEELANATVQGDYLPVIR,SLEGLQTVNQR,LAPTGIADVHR                               | 60S ribosomal protein L13-1                                    | 0,72696 | 1,0416  | 1,4076  | 0,15727102 | 0,12693655 | 0,05337672 |
| Q9FF90  | ATS623900.1 | 1  | SLEGLQSNVQR                                                                   | 60S ribosomal protein L13-3                                    | 0,7629  | 1,3176  | 1,7271  | 0,1468236  | 0,11312893 | 0,04475628 |
| Q9LXR8  | AT3G24830.1 | 2  | VFEVPPPYDK,ELLNGSVVVVR                                                        | 60S ribosomal protein L13a-2                                   | 0,79247 | 1,5157  | 1,8789  | 0,17788236 | 0,06756386 | 0,03539219 |
| Q9T043  | AT4G27090.1 | 3  | ANLNDFDR,LSLTDVIDNR,LVIVDVVDQNR                                               | 60S ribosomal protein L14-2                                    | 0,80169 | 1,2159  | 1,602   | 0,12978731 | 0,2413764  | 0,07124351 |
| Q8WV1   | AT4G17390.1 | 2  | GIVYKPTNCGVTLK,YEILVDPAHNAVR                                                  | 60S ribosomal protein L15-2                                    | 0,95126 | 2,0374  | 2,0569  | 0,33667925 | 0,05089621 | 0,04997613 |
| Q93VJ3  | AT1G27400.1 | 2  | YSQEPNITK,SAQFVLDLKK                                                          | 60S ribosomal protein L17-1                                    | 1,077   | 1,1787  | 1,1553  | 0,49571374 | 0,21781433 | 0,23990571 |
| Q0WRE5  | AT1G67430.1 | 1  | SAQFVLDLKK                                                                    | 60S ribosomal protein L17-2                                    | 0,677   | 0,89836 | 1,4102  | 0,06347689 | 0,33540753 | 0,07814445 |
| P42791  | AT3G05590.1 | 1  | IAVLVETTDQLR,HFGPAPGVPHSHSKPYVR                                               | 60S ribosomal protein L18-2                                    | 1,111   | 1,3849  | 1,3785  | 0,40976466 | 0,08227413 | 0,08836791 |
| Q940B0  | ATS627850.1 | 3  | IAVLVETTDQLR,HFGPAPGVPHSHSKPYVR,APLQGVTLR,APLSLR,SNSFNNAVILK                  | 60S ribosomal protein L18-3                                    | 1,1043  | 1,5313  | 1,4169  | 0,49925283 | 0,12988833 | 0,15236678 |
| P51418  | AT2G34480.1 | 2  | FWYFLR,LJWATEVQR                                                              | 60S ribosomal protein L18a-2                                   | 1,4713  | 1,4713  | 1,6102  | 0,48554397 | 0,02420318 | 0,03633011 |
| Q95RX2  | AT1G02780.1 | 2  | PGGDDVPAAPAAPAAPAAVAPK                                                        | 60S ribosomal protein L19-1                                    | 0,51946 | 0,9298  | 1,7899  | 0,03506043 | 0,32630692 | 0,03801615 |
| Q0WV50  | AT1G57860.1 | 2  | VGDDYDVK,GYRILSTYLR                                                           | 60S ribosomal protein L21-2                                    | 0,74089 | 1,0413  | 1,4055  | 0,13264411 | 0,38984503 | 0,10547876 |
| Q9M9W1  | AT3G05560.3 | 1  | AGALGSDVITTR                                                                  | 60S ribosomal protein L22-2                                    | 0,57848 | 0,89212 | 1,5422  | 0,04823352 | 0,26260914 | 0,07155399 |
| Q8LD46  | AT2G39460.2 | 3  | LTPDYDALDVANK,VNTRUPDGTK,LDHYQILK                                             | 60S ribosomal protein L23a-1                                   | 0,88828 | 1,4961  | 1,6737  | 0,29525989 | 0,05151081 | 0,04504245 |
| Q94F49  | ATS627670.1 | 1  | LLHGVTIASGGVLPNINPVLLK                                                        | histone H2A 7                                                  | 0,21652 | 0,23759 | 1,0973  | 0,00119159 | 0,0005183  | 0,31412586 |
| P51414  | AT3G49910.1 | 5  | VNGTTVNVIQPSK,VVQVVR,VLMSSPLSTDLR,AHFTASSER,DDEVQIVR                          | 60S ribosomal protein L26-1                                    | 1,1595  | 2,228   | 1,9508  | 0,24242069 | 0,06237995 | 0,15355936 |
| P51419  | AT4G15000.1 | 1  | EVATLDALQSK                                                                   | 60S ribosomal protein L27-3                                    | 1,0671  | 1,2207  | 1,2172  | 0,41311163 | 0,0746239  | 0,08183355 |
| Q9LR33  | AT1G23290.1 | 2  | FFCPVNLDK,LWLSVPEDVK                                                          | 60S ribosomal protein L27a-2                                   | 0,89221 | 1,0814  | 1,2825  | 0,21876223 | 0,31921491 | 0,14661987 |
| P49637  | AT1G70600.1 | 1  | LWLSVPEDVK                                                                    | 60S ribosomal protein L27a-3                                   | 1,0565  | 1,5135  | 1,4326  | 0,3814661  | 0,05630528 | 0,09745137 |
| Q0W5A0  | AT1G77940.1 | 1  | LILISTNCPPLR                                                                  | 60S ribosomal protein L30-2                                    | 1,0738  | 1,5146  | 1,4704  | 0,45504834 | 0,03843823 | 0,06026399 |
| Q9LSA3  | AT3G18740.1 | 1  | YNGNVDLGTACGK,LIUSSNCPPLR                                                     | 60S ribosomal protein L30-3                                    | 0,99749 | 1,6172  | 1,6983  | 0,48362139 | 0,07912739 | 0,10547876 |
| P17094  | AT1G43170.9 | 2  | VDFAVSFEK,GIAQLEK                                                             | 60S ribosomal protein L31-3                                    | 1,5427  | 1,4803  | 0,95951 | 0,07772805 | 0,0631033  | 0,40701926 |
| Q80626  | AT2G39390.1 | 1  | SIAQVTVISQK                                                                   | 60S ribosomal protein L35-2                                    | 1,1753  | 1,4314  | 1,2432  | 0,24220458 | 0,07226174 | 0,17307293 |
| Q9FZHO  | AT1G41880.1 | 1  | SNQYPTNSLIQIEVNTQEEVNWYK                                                      | 60S ribosomal protein L35a-2                                   | 1,0194  | 1,6883  | 1,6562  | 0,45267591 | 0,03224572 | 0,05362229 |
| Q9M352  | AT3G53740.4 | 1  | EVAGQAPYEK                                                                    | 60S ribosomal protein L36-2                                    | 0,90412 | 1,8892  | 2,0896  | 0,31054298 | 0,01973783 | 0,02145069 |
| Q8LEM8  | AT3G16080.1 | 1  | CSACAYPAAR                                                                    | 60S ribosomal protein L37-3                                    | 1,8453  | 1,3789  | 0,74724 | 0,0390965  | 0,09056879 | 0,12852101 |
| Q8RXU5  | AT3G60245.1 | 2  | YFCECGK,AGGAYTMTASAVTVR                                                       | 60S ribosomal protein L37a-2                                   | 1,0411  | 1,0213  | 0,98094 | 0,40832398 | 0,43978357 | 0,45165109 |
| Q22860  | AT3G59540.1 | 1  | LYTLVCFDQEK                                                                   | 60S ribosomal protein L38                                      | 1,0669  | 1,2062  | 1,1306  | 0,36464091 | 0,17467063 | 0,27044118 |
| Q9SFA0  | AT3G09630.1 | 1  | IINSDEIQSVNPK                                                                 | 60S ribosomal protein L4-1                                     | 0,45316 | 0,71534 | 1,5786  | 0,02012287 | 0,08425049 | 0,06536678 |
| P49691  | ATS602870.1 | 1  | IINSDEIQSVNPK                                                                 | 60S ribosomal protein L4-2                                     | 0,62445 | 0,74342 | 1,2813  | 0,03241734 | 0,13279871 | 0,07040057 |
| Q8LBI1  | AT3G25520.1 | 3  | SNAYFK,ALLDVGILR,DIVAQIVSASIAGDIVK                                            | 60S ribosomal protein L5-1                                     | 0,88884 | 1,0555  | 1,2087  | 0,19367066 | 0,4125894  | 0,21268144 |
| P49227  | ATS639740.2 | 2  | DIVAQIVSASIAGDIVK                                                             | 60S ribosomal protein L5-2                                     | 1,213   | 1,0465  | 0,86272 | 0,20541826 | 0,38074277 | 0,2413593  |
| Q9FZ76  | AT1G18540.1 | 1  | QLSSGLLLVGFPK                                                                 | 60S ribosomal protein L6-1                                     | 1,1814  | 1,2841  | 1,0869  | 0,22702952 | 0,12836822 | 0,32998295 |
| Q9C9C6  | AT1G74060.1 | 3  | QLASGLLLVGFPK,VDAPVEKPK,VDISGVTLDK                                            | 60S ribosomal protein L6-2                                     | 1,0917  | 0,97028 | 0,88875 | 0,32814661 | 0,4146112  | 0,27726892 |
| Q9C9C5  | AT1G74050.1 | 1  | QLASGLLLVGFPK                                                                 | 60S ribosomal protein L6-3                                     | 0,84318 | 1,5699  | 1,8619  | 0,22317613 | 0,04687855 | 0,03345105 |
| P60040  | AT2G01250.1 | 2  | IALTDSNVEQALGK,HGIICETDIHELIVGPHFK                                            | 60S ribosomal protein L7-2                                     | 0,95362 | 1,4775  | 1,7717  | 0,14287184 | 0,0428636  | 0,02071524 |
| Q3E8G6  | AT2G44120.2 | 1  | IALTDSNVEQALGK                                                                | 60S ribosomal protein L7-3                                     | 1,178   | 1,4388  | 1,3823  | 0,43206157 | 0,09311739 | 0,12974288 |
| P9K9Z2  | AT2G47610.1 | 2  | VSNPFFER,LGVAHVHVK,TASCLCLTVK                                                 | 60S ribosomal protein L7a-1                                    | 0,79152 | 1,5622  | 1,9819  | 0,13995266 | 0,04388296 | 0,02060502 |
| Q9L2H9  | AT3G62870.1 | 1  | TAAALCLTVK                                                                    | 60S ribosomal protein L7a-2                                    | 1,1102  | 1,6379  | 1,5806  | 0,4368568  | 0,02481085 | 0,03543749 |
| P46286  | AT2G18020.1 | 3  | AMIGQVAGGR,SIPGAVCAVNEVHVGDR,ASGDYVIAVHPHSDSTR                                | 60S ribosomal protein L8-1                                     | 1,0071  | 1,2807  | 1,3741  | 0,28627108 | 0,0615253  | 0,04995052 |
| P49209  | AT1G33140.1 | 6  | VIEVEGPR,HLNDFQLK,I,DSVWFGTR,VYAAHFVFNASIGDQK,TALSHVNDLISGVTR,SCALINQK        | 60S ribosomal protein L9-1                                     | 0,984   | 1,3176  | 1,4452  | 0,18877558 | 0,42312681 | 0,20220205 |
| Q9CSJ7  | ATS656630.1 | 1  | VAVVGIK                                                                       | 6-phosphofruktokinase 7                                        | 1,3041  | 2,7363  | 2,0981  | 0,14974463 | 0,00354507 | 0,02145069 |
| Q9FWA3  | AT3G02360.2 | 1  | DSGPCVTYIGK,AGSPVVDQTK                                                        | 6-phosphogluconate dehydrogenase                               | 0,87767 | 1,3445  | 1,5372  | 0,27014962 | 0,26404347 | 0,15390372 |
| A8M534  | AT1G50430.2 | 1  | IVASYTSGTETK                                                                  | 7-dehydrocholesterol reductase                                 | 0,94106 | 1,2976  | 1,323   | 0,42165346 | 0,16898384 | 0,16356589 |
| Q9SRY5  | AT1G02920.1 | 1  | FTVLDLHTPIVQVLLGTPTK                                                          | glutathione S-transferase 11                                   | 4,6163  | 7,3786  | 1,5984  | 0,00119159 | 2,40E-05   | 0,0615125  |
| Q8LPO6  | AT4G25450.1 | 4  | IELGTHSELVAKQ,VELGTLTSDLGALNSVINDNISR,NAPILLDEATSALDAVSEI,LVQSALNR,STIVQLA    | ABC transporter B family member 28                             | 1,0177  | 1,5783  | 1,4602  | 0,44615942 | 0,41028807 | 0,37921453 |
| Q23482  | AT4G16370.1 | 2  | ISTVHALSFLADLK,ILTPQFDLDIGAYNNYK                                              | Oligopeptide transporter 3                                     | 0,29141 | 0,55966 | 1,7647  | 0,00119159 | 0,00271908 | 0,07476504 |
| Q9C8G9  | AT1G30400.2 | 4  | LEEVLSSTEER,LASLAENSLSNVER,VLGIIPQAPVLFSGTVR,LLIDCEDIGR                       | ABC transporter C family member 1                              | 1,2903  | 1,9655  | 1,5977  | 0,36944641 | 0,02064468 | 0,04132934 |
| Q9SX00  |             | 1  | SSLNALFR                                                                      | ABC transporter C family member 13                             | 0,99957 | 1,9426  | 1,9074  | 0,46447374 | 0,0179601  | 0,03119634 |
| Q94FB9  | AT4G39850.1 | 1  | DLALVATVFR                                                                    | ABC transporter D family member 1                              | 1,5884  | 1,061   | 0,99434 | 0,06099168 | 0,29797719 | 0,03801615 |
| Q9FH6   | ATS660790.1 | 3  | LPPPVLFQEVFSFGYPTDYLIK,AAEILGLGDK,VIFAWLXYK                                   | ABC transporter F family member 1                              | 1,3866  | 1,6754  | 1,2083  | 0,11932159 | 0,03350051 | 0,19779495 |
| Q7PC88  | AT2G29940.1 | 1  | LNLIK                                                                         | ABC transporter F family member 31                             | 0,69493 | 1,0034  | 1,4439  | 0,10545331 | 0,48948178 | 0,09313267 |
| Q7PC87  | AT2G36380.1 | 1  | LVEYFAIEGVK                                                                   | ABC transporter G family member 34                             | 1,2242  | 0,89492 | 0,731   | 0,19718068 | 0,2670029  | 0,11838808 |
| Q9XIE2  | AT1G59870.1 | 13 | SLPTLLNVVR,YEHLTIK,NSLVDYTLK,VQETFAR,DISGVIKPGR,NAFFVVK,LSVDFALYNSQSAHQOR,MSI | ABC transporter G family member 36                             | 1,2522  | 1,2868  | 1,0413  | 0,13264411 | 0,13401989 | 0,36854968 |
| Q7PC84  | AT1G66950.1 | 1  | IQILK                                                                         | ABC transporter G family member 39                             | 1,2219  | 1,4094  | 1,1781  | 0,14224503 | 0,09018468 | 0,40507275 |
| A0NAA8  | AT2G01320.2 | 3  | QFLLLK,TLLNVLQGLLSLPR                                                         | ABC transporter G family member 7                              | 0,91247 | 1,3754  | 1,5073  | 0,32194046 | 0,09131721 | 0,07809191 |
| Q8W496  | AT4G25650.2 | 1  | LSLIFICIPVSPGR                                                                | ACD1-like protein                                              | 1,0537  | 1,1736  | 1,1139  | 0,3847187  | 0,20271416 | 0,2908149  |
| Q38971  | AT1G36160.2 | 2  | DLFEGILOAGSTVENLR                                                             | acetyl-CoA carboxylase 1                                       | 0,74916 | 0,89041 | 1,2052  | 0,15424716 | 0,27514969 | 0,23559881 |
| Q2HIV2  | AT3G25760.1 | 2  | ALKPSSGVSNFTN,GLANDLPLELGIPTVPPSK,FGLGDVPPFTNK                                | allene oxide cyclase 1                                         | 3,8866  | 4,6524  | 1,3975  | 0,00119159 | 0,00033184 | 0,36345423 |
| P56765  |             | 2  | ISSVLCDYQSSK,GLLDIVPR                                                         | Acetyl-coenzyme A carboxylase carboxyl transferase subunit bet | 0,68371 | 0,71569 | 1,0372  | 0,10907499 | 0,15491052 | 0,24459912 |
| Q9FJE8  | ATS659870.1 | 2  | HLLLAIR,LLSGVTIAHGGVLPNINSVLLPK                                               | histone H2A 6                                                  | 0,23441 | 0,27302 | 1,1647  | 0,00119159 | 0,00104436 | 0,23682267 |
| Q9SIB9  | AT2G05710.1 | 1  | SGEDADTLGLTGHDR                                                               | aconitate hydratase 2                                          | 1,6289  | 2,7985  | 1,718   | 0,06099168 | 0,00325483 | 0,04559256 |
| Q3E6W5  | AT2G31810.2 | 1  | VEDISSEPVQR                                                                   | ACT domain-containing small subunit of acetoacetate synthase p | 1,1183  | 1,155   | 1,0328  | 0,29525989 | 0,22191953 | 0,42536905 |
| Q9SRQ7  | AT3G03530.1 | 5  | LPNVVVEQR,SNVSSSDTNSLR,LLLEGFQK,QDCPELSTPIK,LVYHSATSHGATSNDK                  | phospholipase C                                                | 3,2845  | 2,0092  | 0,60677 |            |            |            |

|        |              |                                                                                 |                                                                  |         |         |         |            |            |            |
|--------|--------------|---------------------------------------------------------------------------------|------------------------------------------------------------------|---------|---------|---------|------------|------------|------------|
| B3LFB3 | AT3G09820.1  | 1 AGCYASNVIQR                                                                   | adenosine kinase 1                                               | 1,3425  | 0,84806 | 0,6317  | 0,13416284 | 0,19802596 | 0,06464314 |
| 082514 | AT5G63400.1  | 5 AVLTNIOAEK,APQEVSTVK,TPGVK,TPGVDDITGEPLIQR,LAAFHSQTPQVVIDYAK,VLNFAIDDAILEER   | adenylate kinase 1                                               | 1,2245  | 1,3169  | 1,161   | 0,14901598 | 0,24705869 | 0,08325311 |
| Q2V2W1 | AT5G63400.2  | 1 VLNFAIDDAILEER                                                                | adenylate kinase 1                                               | 0,9878  | 0,93108 | 0,94258 | 0,46816001 | 0,32795148 | 0,37098288 |
| Q8VYL1 | AT5G35170.1  | 4 AEVSSGDIGTK,YVLLATYAERTPEQIDDAFSQK,LVTRPDDTEEK,RPVVLLNVR                      | adenylate kinase family protein                                  | 1,0224  | 0,82805 | 0,80987 | 0,44591736 | 0,17392991 | 0,17667834 |
| Q0WVD8 | AT1G30850.0  | 5 TDGIAGLYR,GFNISCYGIIVYR,GFNTFALDRLMGVSVAAVSK,QFDGLVDVYR                       | ADP,ATP carrier protein 1                                        | 1,1053  | 1,2739  | 1,1802  | 0,18646308 | 0,11452519 | 0,37086758 |
| Q0WV68 | AT1G80300.1  | 2 LLTTLGPR,IFGVEVATLK                                                           | ADP,ATP carrier protein 1                                        | 0,96836 | 0,87294 | 0,91374 | 0,44298988 | 0,15233262 | 0,19551153 |
| P40941 | AT5G13490.2  | 3 LLIQNDQEMLK,GFNISCAGIIVYR,SDGIAGLYR                                           | ADP,ATP carrier protein 2                                        | 1,0562  | 3,4331  | 3,5799  | 0,42165346 | 0,05301688 | 0,08303118 |
| P92935 | AT1G15500.1  | 3 IFGVEVTTLK,LLATLGP,IPVVSQEDAPSGEITSQLEK                                       | ADP,ATP carrier protein 2                                        | 0,54633 | 0,81468 | 1,4912  | 0,04040215 | 0,15959709 | 0,08075935 |
| Q9LQC8 | AT1G70490.3  | 6 MLNEDELR,ILMVGLDAAGK,LGVEITTIPTGFINVETVEYK,QDLPNAMNAAEITDK,NISFTVWVDVGQDK,C   | ADP-ribosylation factor 2                                        | 0,69804 | 0,89463 | 1,2816  | 0,10766085 | 0,26660992 | 0,15212316 |
| Q6I097 | AT1G10630.1  | 5 MLNEDELR,ILMVGLDAAGK,LGVEITTIPTGFINVETVEYK,QDLPNAMNAAEITDK,NISFTVWVDVGQDK,C   | ADP-ribosylation factor A1F                                      | 1,128   | 1,1416  | 1,0277  | 0,274315   | 0,28375281 | 0,43420114 |
| Q8V570 | AT1G349870.1 | 1 AVSAIYYVDAADPNLSVSK                                                           | ADP-ribosylation factor-like A1C                                 | 0,84779 | 0,61578 | 0,72634 | 0,22830814 | 0,03966131 | 0,11535213 |
| Q06327 | AT1G55020.1  | 1 LPTSSLDIYVPR                                                                  | lipoxygenase 1                                                   | 4,1369  | 3,0705  | 0,74223 | 0,00121527 | 0,00243954 | 0,12540988 |
| Q2V412 | AT2G41100.3  | 1 LTDDQITEYR                                                                    | calmodulin-like protein 12                                       | 3,679   | 3,6934  | 0,99799 | 0,00240024 | 0,00134791 | 0,39452092 |
| Q56YU0 | AT3G24503.1  | 1 EAGIPDGLNIVTGGFAGGAAIASHMDVDK                                                 | aldehyde dehydrogenase 2C4                                       | 1,9349  | 3,6348  | 1,8786  | 0,03424101 | 0,0010594  | 0,03225315 |
| Q70E96 | AT4G36250.1  | 5 LPLFLYPAK,SFGENPK,TATVAINCLDK,CPTVVDHHTSK,IIMAAAAQHLPVTLLELGGK                | aldehyde dehydrogenase 3F1                                       | 1,1082  | 1,1628  | 1,0718  | 0,39151124 | 0,19802596 | 0,27971321 |
| Q70UD8 | AT1G44170.2  | 5 LLEQYLDPSAVR,DDLKGPPESSVYEVSLR,SPVWVSDSDTLK,ALVDNSINFDLK,VVEGAVTETSALLEQK     | aldehyde dehydrogenase 3H1                                       | 1,7896  | 2,1368  | 1,1566  | 0,08337039 | 0,0448421  | 0,40070282 |
| Q95T13 | AT3G47800.1  | 4 YGGLCLETQGFPPSNVHK,IHELPGGVDIMYVIGDKP,GFSDVWSVQK,LIPTGEITSITGTPYDFLEPR        | aldose 1-epimerase                                               | 0,80321 | 0,63953 | 0,7888  | 0,09929699 | 0,0194921  | 0,14396051 |
| Q94G05 | AT4G25900.1  | 2 VITFNACLDR,FVTVESAARVKNP                                                      | aldose 1-epimerase family protein                                | 1,1906  | 2,0017  | 1,6813  | 0,22069077 | 0,01516721 | 0,04946517 |
| BLGV36 | AT3G28660.1  | 1 NEIDTVLGPVQVTEFDLHK                                                           | cinnamate 4-hydroxylase                                          | 3,5288  | 2,5677  | 0,72763 | 0,00287954 | 0,00489045 | 0,11591242 |
| Q9LXK0 | AT5G19510.1  | 1 NPVTYLLDDEATSAIDKESICYLQEALEER                                                | ABC transporter B family member 19                               | 0,79547 | 0,34809 | 1,1781  | 0,00342053 | 0,00286739 | 0,22475865 |
| Q95CX3 | AT5G25780.1  | 4 GVMENGLFVWASK,YVAAVVPKSDAFPNASK,SVEEHLGK,AVTFSDLTHEEGVK                       | Elongation factor 1-beta 2                                       | 3,4476  | 3,6971  | 1,1344  | 0,00444978 | 0,00096352 | 0,247568   |
| Q9L501 | AT3G25780.1  | 1 IQELNLYELEGDR                                                                 | allene oxide cyclase 3                                           | 1,1347  | 1,2649  | 1,1147  | 0,2749585  | 0,13666172 | 0,29002757 |
| Q96242 | AT5G42650.1  | 20 SNGGELTGAIEK,DFVVLV,LLR,LLFFLLK,SVVYECR,ADFGSSSDGTAFNFLR,LFVIEFR,AFYGTNPADT  | allene oxide synthase                                            | 0,87966 | 3,4924  | 3,3957  | 0,48920473 | 0,01120702 | 0,02006469 |
| Q95J17 | AT2G42690.1  | 1 NWDITLDPDQSLR                                                                 | alpha/beta-hydrolase domain-containing protein                   | 2,4595  | 1,2936  | 0,52678 | 0,01523118 | 0,14483867 | 0,03184562 |
| Q8VZ57 | AT1G52510.1  | 2 IPIFGFETCCNALIAER,LAILNSPLTVSSVPPGLFK                                         | alpha/beta-hydrolase domain-containing protein                   | 1,1143  | 1,386   | 1,2221  | 0,31578971 | 0,13614272 | 0,24929874 |
| Q93Z70 | AT2G19940.2  | 1 AIHSVDNLVK                                                                    | alpha/beta-hydrolase domain-containing protein                   | 1,0157  | 1,3948  | 1,3732  | 0,4602126  | 0,08520734 | 0,11641753 |
| AI4U41 | AT3G10840.1  | 1 FLGNAGFGSQDDVDLK                                                              | alpha/beta-hydrolase domain-containing protein                   | 0,9476  | 1,0905  | 1,1508  | 0,38323589 | 0,30327825 | 0,24929874 |
| Q9FFW9 | AT5G38520.1  | 3 LLPWLQAQSLT,LIPETKPVLLVWGDQGLTLPDGPVQK,GIASALFNR                              | alpha/beta-hydrolase-like protein                                | 1,4072  | 1,5043  | 1,069   | 0,11445402 | 0,05810662 | 0,35838427 |
| Q95GH6 | AT3G01420.1  | 15 FLLVILVHGDK,LPVFLGLTYLEVR,RPDPMVATK,IHTDVTQQLK,GLEWVNTTESLK,LVTSAAVAK,TPW1   | alpha-dioxygenase                                                | 1,636   | 0,95316 | 0,6217  | 0,0385024  | 0,2804106  | 0,02339742 |
| Q8VXZ7 | AT3G56310.1  | 1 EIAVANDPDLGVQGR                                                               | alpha-galactosidase                                              | 1,2146  | 1,1024  | 0,90761 | 0,20402177 | 0,28570603 | 0,30776669 |
| Q9L502 | AT3G25770.1  | 2 GLANDLPLETGTVPVPSK,VQELSYEINELDR,NAFSLMFGDLGLVPFTNK                           | allene oxide cyclase 2                                           | 2,961   | 2,5132  | 0,9533  | 0,00514795 | 0,00976953 | 0,10262434 |
| Q95PE6 | AT3G56190.1  | 12 AVNIFCEIGR,VDTNEAASCLR,HSLNINLKL,QYDLPFTTGR,ADVVSITNALEK,FLADLASAIDEIAKH     | alpha-soluble NSF attachment protein 2                           | 1,0243  | 0,96785 | 1,0614  | 0,28236567 | 0,24575719 | 0,48940992 |
| Q95Y77 | AT1G68560.1  | 12 EYDASHYSGFSETHIK,QELYQWDTVADSAR,DFTLNVPVAYPR,PLDVIWDDDDHMDGHK,QCPSGEGPG      | alpha-xyloridase 1                                               | 1,0517  | 0,72992 | 0,71877 | 0,39110214 | 0,27850583 | 0,38080967 |
| Q2V367 | AT5G19140.2  | 2 DEIFCLFGSLDNLGSLK                                                             | aluminum induced protein with YGL and LRDR motifs                | 1,1191  | 1,4104  | 1,2602  | 0,29497091 | 0,08050429 | 0,16012956 |
| Q41931 | AT1G62380.1  | 2 DSEYPSFVDYMK,HLQPSLNNDISVSDYER                                                | aminocyclopropane carboxylate oxidase                            | 1,2031  | 1,047   | 0,87032 | 0,21322366 | 0,37990607 | 0,25155844 |
| Q65396 | AT1G11860.3  | 11 TGYTGEDGFEISVPDEHADVAK,GGADSDVTSK,VITDEHYLVVNAAGR,LLALQGLPAAPVLIQHLTK,VGFF   | aminomethyltransferase                                           | 1,1299  | 1,0562  | 0,97581 | 0,31684455 | 0,32358376 | 0,4497903  |
| P38418 | AT3G45140.1  | 3 GYITAEQEEFLGITWGR,GLDDIADIR,YGGEFVYPR,LPGSGITTCESVWVAPK,LTIPIYFANGDGLWDAIK,A  | lipoxigenase 2                                                   | 2,8506  | 3,2054  | 1,1384  | 0,00594029 | 0,00332527 | 0,31160325 |
| Q95Y70 | AT1G35720.1  | 12 STIQLTRPELYFVDFVLR,VSDSVPAQSDAEQRLR,TAFEGWGTNEDLISILAHK,ALLWTLPEGER,TSTQLLH  | annexin D1                                                       | 1,9527  | 0,99534 | 0,52273 | 0,03514917 | 0,30101402 | 0,04132694 |
| Q9XCE2 | AT5G65020.1  | 14 VPSNVLPEDDAEQLHK,YEGDDVMNMLAR,SVYAATYVYEDLK,ELSSDFER,LLLPLVSTFR,AFSGWGTNE    | annexin D2                                                       | 2,4095  | 1,2226  | 0,50782 | 0,01446762 | 0,0980089  | 0,04033278 |
| Q9SE45 | AT3G8760.1   | 6 VPNEVPSAQDSETLK,LLVTLASTFR,VAIFCDIPEK,DLIDVLSSELSGDMFK,DSIEFGTDEDSLTR,DFIITLU | annexin D3                                                       | 1,5622  | 0,67963 | 0,48706 | 0,32110536 | 0,04938623 | 0,0467166  |
| Q9ZVJ6 | AT2G38750.1  | 3 HFNEIK,LLVGLVSAYR,DFLLTLLSK,SSLNLEALICLKPALYSK                                | annexin D4                                                       | 0,81904 | 0,68008 | 0,88517 | 0,36464091 | 0,09018468 | 0,15411065 |
| Q9LD43 | AT2G38040.2  | 1 IEALEQKIK                                                                     | acetyl-coenzyme A carboxylase carboxyl transferase subunit alpha | 0,33612 | 0,39591 | 1,1779  | 0,00630893 | 0,00536658 | 0,22488197 |
| Q8L7A9 | AT1G31730.1  | 2 DLVSSVSIKL,LSAVESYQLISEPK                                                     | AP-4 complex subunit epsilon                                     | 0,75327 | 0,94089 | 1,2491  | 0,14059531 | 0,34770623 | 0,16725231 |
| Q94E12 |              | 7 IVEGDAEDLPFTDYADR,EEYIEWFK,FFSDVWMLFPK,VYSAGSIEYWPDPQR,VVDVGGGTGTTGLVYK,      | APG1                                                             | 1,1483  | 1,1557  | 1,0154  | 0,20274946 | 0,16604258 | 0,49362608 |
| P61837 | AT3G61430.2  | 3 QYQALGGGANTIAHYGTYK,EPMPAPFFPEGLSSWSFWR                                       | aquaporin PIP1-1                                                 | 1,1359  | 0,60508 | 0,51733 | 0,41328858 | 0,00354507 | 0,00652833 |
| ABMRW1 | AT2G45960.3  | 3 QYQALGGGANTIAHYGTYK,EPMPAPFFPEGLSSWSFWR,SLGAAIFNK                             | aquaporin PIP1-2                                                 | 0,90336 | 0,48445 | 0,63273 | 0,06713121 | 0,00667631 | 0,07809191 |
| B9DFR9 | AT2G45960.2  | 1 QYQALGGGANTIAHYGTYK                                                           | aquaporin PIP1-2                                                 | 0,53146 | 0,75493 | 1,4205  | 0,0374089  | 0,11058961 | 0,100525   |
| Q08733 | AT1G01620.1  | 3 QPIGTSAQTDK,EPMPAPFFPEGLSSWSFWR                                               | aquaporin PIP1-3                                                 | 0,84199 | 0,25775 | 0,30612 | 0,2218635  | 0,00078311 | 0,00351289 |
| P43286 | AT3G53420.2  | 3 DVEAVPGEFQTR,DYQDPPPAAPHIDGAEIK,ALLYHQAICGAICGVGVFK                           | aquaporin PIP2-1                                                 | 0,71276 | 0,6127  | 0,95468 | 0,08351316 | 0,01007099 | 0,08876987 |
| P43287 | AT2G37170.1  | 3 AFQSSYWR,DVIEGPEFQTR,DYEDPPPTFFDAELTK                                         | aquaporin PIP2-2                                                 | 1,9601  | 0,82066 | 0,43324 | 0,35207156 | 0,00488204 | 0,01392798 |
| Q05VL5 | AT4G35100.2  | 2 DYVDPPAPLDDMGELK,DSHPIYLRPIGFAFMVHLVATPIPTGTGINPAR                            | aquaporin PIP2-2                                                 | 0,62361 | 0,46622 | 0,74117 | 0,06440019 | 0,01107518 | 0,12465876 |
| P25818 | AT2G36830.1  | 2 AALAEFISTVLPVACSGSGMAFNK,NIAGRPDEATRPDAK                                      | aquaporin TIP1-1                                                 | 0,75368 | 0,44179 | 0,55934 | 0,21902323 | 0,04119178 | 0,12396967 |
| Q41963 | AT2G6520.1   | 2 NIAIGVGQEEVYHFNALR,AALAEFISTVLPVACSGSGMAFNK                                   | aquaporin TIP1-2                                                 | 0,58958 | 0,41026 | 0,69996 | 0,16741981 | 0,02878188 | 0,12164239 |
| Q41951 | AT3G16240.1  | 3 GSLGTIARPLAGLVANILAGPFGSGMNPARR,AGVAFSGFDDSDSFLASLR                           | aquaporin TIP2-1                                                 | 0,80974 | 0,37563 | 0,4378  | 0,35896271 | 0,00296739 | 0,00839134 |
| Q56WK6 | AT1G72150.1  | 11 IDELVSEGEVSEFEK,EGHVYVSSYGEFQNK,SADVAAPVYK,AIDFSNPEAK,QFEDNYPEFAAK,IVITDQK   | patellin-1                                                       | 0,58578 | 0,40104 | 1,7006  | 0,00630893 | 0,00931231 | 0,13614308 |
| Q95Z3X | AT4G24830.1  | 2 GVYETPGTILFAVQLESLETLDR,ALSPATLLAELNTGIGK                                     | argininosuccinate synthase                                       | 0,71952 | 1,1589  | 1,5595  | 0,11207126 | 0,43888698 | 0,0916192  |
| Q23247 | AT4G26300.1  | 1 VIRLEGDPIPLMVK                                                                | Arginyl-tRNA synthetase, class Ic                                | 0,69052 | 0,69052 | 0,95951 | 0,11932159 | 0,07113495 | 0,40701926 |
| Q93V58 | AT5G19820.1  | 6 EGGFFWIDQVAPTLVPLK,ILVFAEVLTKG,LLNVVQLPNAR,JAALNAVISFVQLANSTER                | armadillo/beta-catenin-like repeat-containing protein            | 0,61712 | 0,91799 | 1,5415  | 0,09843317 | 0,17420063 | 0,19256419 |
| Q9FJD4 | AT5G53480.1  | 3 QFQEQNLGFLLSLAGELANDEKPVDSR,SVKPPIFCFDGIALAIGEDFDK,QALPGLVPLLETLK             | armadillo/beta-catenin-like repeat-containing protein            | 0,56849 | 0,71742 | 1,262   | 0,04635602 | 0,08538335 | 0,15090481 |
| Q9FX95 | AT1G49670.1  | 4 IYAGVNASDVFNSGR,FHQGLSFPFAIFVK,LPDFAFGFVGLAAVGSVK                             | ARP protein                                                      | 1,23    | 1,9185  | 1,5597  | 0,19251025 | 0,01843986 | 0,06904298 |
| Q04947 |              | 2 LPSPSPVPTPR,LIILNTQNLIDGYTK                                                   | ascorbate oxidase                                                | 1,4347  | 2,2293  | 1,5538  | 0,10667054 | 0,00968629 | 0,06932445 |
| P82281 | AT4G09010.1  | 12 QAVMSAFLGPDQAAATEQLATDPQVAPVWVK,FTYLAISDR,DATEADPEGR,FIAGVLGPR,ETSQTDYE      | ascorbate peroxidase 4                                           | 1,4606  | 1,3908  | 1,0285  | 0,13462476 | 0,0791647  | 0,38151565 |
| P46644 | AT5G11520.1  | 1 IFTLAGLVTK,ILIGDASPAIR                                                        | aspartate aminotransferase 4                                     | 1,7898  | 1,3783  | 0,77004 | 0,04306948 | 0,09060668 | 0,14369822 |
| Q94AF6 | AT5G20160.1  | 1 AYPALDSQLSITLDLVQQAQNYK                                                       | U4/U6 small nuclear ribonucleoprotein SNU13                      | 2,9457  | 4,2155  | 1,4311  | 0,00630893 | 0,0005183  | 0,09745137 |
| P46248 | AT4G31990.2  | 1 ISLAGLSLAK                                                                    | aspartate aminotransferase                                       | 1,6086  | 1,0878  | 0,67628 | 0,06347689 | 0,30606248 | 0,08325311 |
| Q38934 |              | 5 AARPVWNMLK,FTVVDFTGSSNLWVSPSK,TVVDQYQTLDLLLSTQPK,CYFSLACLHPK,FDGILGLGFK       | aspartic peptidase                                               | 1,2215  | 1,4964  | 1,236   | 0,32141383 | 0,09223695 | 0,16545095 |
| Q9L173 | AT3G25700.1  | 1 LFFTLLTNPLSPTFYVVK                                                            | aspartyl protease family protein                                 | 1,1651  | 0,86832 | 0,7453  | 0,24063742 | 0,22601448 | 0,12730146 |
| Q9M2U7 | AT3G54400.1  | 2 GPLSLISQSQNLVQSTFSYCLPNSK,AIVQSPTYVYR                                         | aspartyl protease family protein                                 | 0,86992 | 0,79575 | 0,91474 | 0,25804393 | 0,14149413 | 0,32009677 |
| Q04496 | AT1G09750.1  | 1 QNANAVLNVIANLQQQNLK                                                           | aspartyl protease-like protein                                   | 1,1658  | 0,96012 | 0,85155 | 0,23050855 | 0,39651228 | 0,18571584 |
| Q9M356 | AT3G61820.1  | 3 VAYDLVGR,LDSDSECVTR,LTQAPVALR                                                 | aspartyl protease-like protein                                   | 0,95196 | 0,90592 | 0,95163 | 0,39110214 | 0,28375281 | 0,38863231 |
| Q9ZV55 | AT1G03230.1  | 4 ISSVNPYTVLESSYK,IPNLIFSGSGLLTK,PLNPTGTTVEFSK,EFWVDCDQYVSTYTR                  | aspartyl protease-like protein                                   | 0,73461 | 0,93552 | 1,2821  | 0,0390965  | 0,0779512  | 0,14132648 |
| Q8VZ78 |              | 1 GGDNQSEVSK                                                                    | At1g02120/77123_26                                               | 0,80275 | 0,7667  | 0,95509 | 0,18321838 | 0,11958975 | 0,39714947 |
| B0FV99 |              | 1 EPAQGEKPEVPR                                                                  | At1g04270                                                        | 0,49762 | 2,1827  | 4,3862  | 0,02976225 | 0,01051718 | 0,00054729 |
| Q94KD4 |              | 1 LLTSASDDVR                                                                    | At1g09270/712M4_2                                                | 0,74608 | 0,81671 | 1,0947  | 0,13472408 | 0,16177995 | 0,31762474 |
| B9DGT0 |              | 4 IVSFLDDPGWK,IVNQLGGK,GGGSVIAVFK,DPDQYFELIQR                                   | AT1G11840                                                        | 1,7168  | 1,2688  | 0,7629  | 0,0753558  | 0,099675   | 0,25156677 |
| B9D6Z4 |              | 7 SDLDVNSASCITNCLAPLAK,AAFNIPSSGAAK,FGVIEGLTMT                                  |                                                                  |         |         |         |            |            |            |

|        |             |    |                                                                                  |                                                                    |         |         |         |            |            |            |
|--------|-------------|----|----------------------------------------------------------------------------------|--------------------------------------------------------------------|---------|---------|---------|------------|------------|------------|
| COZ3G4 |             | 1  | VVAAYLAVLSGK                                                                     | AT2G27710                                                          | 1,4248  | 1,2534  | 0,8909  | 0,18321838 | 0,24306048 | 0,31493804 |
| B9DHR0 |             | 3  | ETIGGDEFRR,GVLVIGPPGTGK,SLVAYEHVGHAVCGTLPGHDAVQK,LVEVLEK,VPSSTTTTPASAPTPAAV      | AT2G30950                                                          | 1,8849  | 1,5537  | 1,0508  | 0,07214592 | 0,07412095 | 0,32052402 |
| COZ300 |             | 1  | ALFTQVTK                                                                         | AT2G37660                                                          | 1,1086  | 1,0335  | 0,93225 | 0,30758306 | 0,40910075 | 0,35218597 |
| Q8VZG8 | AT4G08850.1 | 1  | LLTNLELDLSSNR                                                                    | Leucine-rich repeat-containing protein                             | 2,9398  | 2,4104  | 0,81992 | 0,00630893 | 0,00647983 | 0,18816785 |
| Q9ASV4 |             | 1  | FVFEFLTR                                                                         | AT3g06720/F3E22_14                                                 | 0,84143 | 1,2699  | 1,5092  | 0,2218635  | 0,13401989 | 0,07799316 |
| COZ3A0 |             | 2  | FGSLLNLPVAVIALGR                                                                 | AT3G06850                                                          | 1,0003  | 1,7936  | 1,7931  | 0,49925283 | 0,02441009 | 0,03772105 |
| B9DHP6 |             | 1  | CTGLLLAR                                                                         | AT3G25520                                                          | 0,91659 | 1,587   | 1,7137  | 0,42165346 | 0,02438436 | 0,03345105 |
| B9DQG8 |             | 1  | FEQEISSR                                                                         | AT3G27570                                                          | 1,3881  | 2,3239  | 1,6742  | 0,11932159 | 0,00779529 | 0,05008108 |
| COZ391 |             | 1  | LGALGCTFFPEILSK                                                                  | AT3G27690                                                          | 0,84556 | 0,7938  | 0,88106 | 0,4029344  | 0,28402752 | 0,37737857 |
| B9DHN8 |             | 8  | VIVADLK,AGNAVIGNGIDDVLLK,LINHENAEVTK,SSFVQADGVK,GPVIAISCLSLLK,LPHDESLANEDTYEFP   | AT3g42050/F4M19_10                                                 | 0,92624 | 1,696   | 2,2553  | 0,45396265 | 0,13669608 | 0,17307293 |
| Q94C38 |             | 5  | VIVADLK,VVILTFR,LINHENAEVTK,SSFVQADGVK,ENVTFCEENDFOQLR                           | AT3g46970/F13I12_20                                                | 0,75129 | 0,76181 | 1,014   | 0,13922032 | 0,11536542 | 0,46466908 |
| Q93ZL3 |             | 3  | QQFFELCSASLQDIISR,FSPWEYFR,QLMNLIGVYVR                                           | AT3g52500/F22O6_120                                                | 0,94847 | 1,3805  | 1,4555  | 0,3847187  | 0,09018468 | 0,08876987 |
| Q93Z77 |             | 7  | GDVTVPELIFEFK,TPLGYTPFR,GPVSLPSQMNLLK,YLCSGCDGFDGLDPTLIPR,AFLEYEYLLNLR,LDFPDLTVP | AT4g10060/TS19_190                                                 | 1,4817  | 1,0342  | 0,698   | 0,09361953 | 0,4075447  | 0,09745137 |
| Q8LPR0 |             | 4  | ESSLPVSVFEFTMSNLGK,FVLQVYR,LVAGDEEESNLLLR,GFQTASGIEAIWSDR                        | AT4G11010                                                          | 1,3403  | 0,92062 | 0,68687 | 0,13472408 | 0,30839936 | 0,08876987 |
| B9DHH1 |             | 2  | GDLATVYGR,GLUIEISR,LIGATDPQK                                                     | AT4g13930                                                          | 1,3014  | 2,1383  | 1,6698  | 0,16168813 | 0,01183842 | 0,05337672 |
| Q9FPJ3 |             | 3  | ISATSIFYFSLPYK,LLICGGSAYPR,NAVFGDSSALAPGGVR                                      | AT4g29690                                                          | 1,0025  | 0,82247 | 0,82858 | 0,42303608 | 0,27470657 | 0,34816126 |
| Q84WJ3 |             | 1  | VIVIDLADWIK                                                                      | AT4g32520/F8B4_220                                                 | 0,36739 | 0,74161 | 2,0186  | 0,0076488  | 0,10051964 | 0,02511127 |
| Q84JQ3 |             | 1  | DFWVADFIK                                                                        | AT4G33030                                                          | 0,92906 | 1,6982  | 1,8279  | 0,35150194 | 0,03113571 | 0,0355902  |
| B9D06  |             | 1  | ATDILNQGVYGVK                                                                    | AT4g3790/F4B14_60                                                  | 1,0586  | 1,3011  | 1,2291  | 0,3767835  | 0,12137488 | 0,18070565 |
| Q8L891 |             | 1  | VLLLVNDQK                                                                        | A5g07030                                                           | 0,48326 | 1,2533  | 2,5976  | 0,02590559 | 0,14196313 | 0,00995155 |
| Q9FL43 |             | 4  | VPTITFMFK,LAKPVEAYFR,VKPTAVTSLGFGDTQSYGQV,KLPTSQSPQR                             | histone H2B                                                        | 1,066   | 0,78262 | 0,75725 | 0,37451204 | 0,09725565 | 0,15236679 |
| Q8LQO4 | AT1G07790.1 | 1  | TAERPVEENK                                                                       | AT5g13390/T22N19_40                                                | 0,34323 | 0,37037 | 1,0791  | 0,00641506 | 0,00367439 | 0,34243418 |
| Q8L749 |             | 1  | VLGVIGVYSAQGVISR                                                                 | AT5g17920/MP17_60                                                  | 0,54039 | 1,0955  | 2,0273  | 0,0390965  | 0,29593287 | 0,02474635 |
| Q93ZK3 |             | 5  | IPSESEIADR,ALGVDTPVVLVGPVSVLLSK,SELLSLLPK,NIWANDFAASLTLQALEGIVGK                 | ATMRK1                                                             | 0,57071 | 0,70011 | 1,2171  | 0,04274392 | 0,05863512 | 0,20220305 |
| B9DGL9 |             | 1  | GLSLEIESK                                                                        | ATMRK1                                                             | 1,2938  | 1,129   | 0,87262 | 0,15508788 | 0,25211857 | 0,25387857 |
| Q8LCP3 |             | 1  | DVIQLALDLAR                                                                      | ATMRK1                                                             | 0,76016 | 0,48804 | 0,64202 | 0,14481507 | 0,01377556 | 0,06904298 |
| P56758 | ATCG00150.1 | 2  | LIQLPQGLAAPTNDINTVALLTSSVAYFYAGLSK,NPQTIPTDGGFFEFVLEFR,IYQIPTPILLINLEDFTKI       | ATP synthase CF0 A subunit                                         | 0,6612  | 1,531   | 2,3164  | 0,08503666 | 0,10185261 | 0,02474635 |
| P56759 | ATCG00130.1 | 6  | LNITRI,EGAIQLENAR,GVINDLLNR,NETILFEQOR,VNGYSEIER,VFQALQGAIGTINLSCLSNEHLR         | ATP synthase CF0 B subunit                                         | 1,199   | 1,1682  | 1,0045  | 0,2218635  | 0,04781749 | 0,13576487 |
| P56757 | ATCG00120.1 | 15 | EVITVNTGTVLQVGDGJAR,IAQIPSEAYLGR,TLTAEAFSLK,SVYEQIATGLAIDSMPIGR,FLVQLR,QSQS      | ATP synthase CF1 alpha subunit                                     | 0,99271 | 1,2348  | 1,2009  | 0,49417787 | 0,13388272 | 0,1545229  |
| P19366 | ATCG00480.1 | 30 | VGLTALTMAEYFR,GNLUSLGEFDSLPEQAFYLVGNIDEATAK,ELQDIHALGLDESEDR,EGNDLYMMEK,F        | ATP synthase CF1 beta subunit                                      | 1,007   | 1,3243  | 1,259   | 0,36165493 | 0,07071045 | 0,12344714 |
| P09468 | ATCG00470.1 | 2  | IGNNETILNDAEK,NSDIDPQEAQQLTLEIAENLR                                              | ATP synthase CF1 epsilon subunit                                   | 1,1258  | 1,3959  | 1,1987  | 0,15102512 | 0,02701153 | 0,12724561 |
| Q9SU19 |             | 11 | VALVVTGDR,RPIVPDK,YLEAGTLPTAK,FVSLVK,ALQESLASELAAR,GEICDINGTCVDAEDEFRR,GSNY      | ATP synthase gamma chain, chloroplast precursor                    | 0,99889 | 1,2343  | 1,1685  | 0,30758306 | 0,09424463 | 0,17803691 |
| A7KN15 |             | 1  | LATLNAISSR,ESLVLRL                                                               | ATP synthase protein M125                                          | 1,5346  | 2,8419  | 1,8519  | 0,21818685 | 0          | 0          |
| P93303 | ATMG00480.1 | 3  | AVDLLGK,NQLLSHR,ITLUSCFGEISGR,DPNSLEDLLR                                         | ATP synthase protein YMF19                                         | 0,93219 | 2,1891  | 2,7259  | 0,23747711 | 0,02479861 | 0,07421815 |
| P60112 |             | 1  | LIGAGAATIALAGAAIGINVFSSHLSVAR                                                    | ATP synthase subunit 9, mitochondrial                              | 0,39106 | 2,7759  | 0,70984 | 0,0106699  | 0,00332527 | 3,20E-05   |
| P92549 |             | 3  | AILNSVKPELLQAK,MELDAFLK                                                          | ATP synthase subunit alpha, mitochondrial                          | 0,86321 | 1,6196  | 1,8151  | 0,27014962 | 0,04476232 | 0,03640683 |
| P83484 | AT5G08690.1 | 18 | YDLSLSEQSFYMGVGDIEVAAK,EGNDLYR,TEHYLPIHR,QISELGIYPVADPLDSTR,VLNTGAPITVPVGR,IPS   | ATP synthase subunit beta-2                                        | 1,143   | 2,5589  | 2,2387  | 0,26501876 | 0,004953   | 0,01740826 |
| Q9C5A9 | AT5G08680.1 | 14 | YDLSLSEQSFYMGVGDIEVAAK,TEHYLPIHR,QISELGIYPVADPLDSTR,IPSAVGYQPTLASDLGALQER,VLN    | ATP synthase subunit beta-3                                        | 0,90886 | 1,3444  | 1,4753  | 0,22421051 | 0,1140068  | 0,06904298 |
| Q9F252 | AT3G52300.1 | 5  | EAYDSIEPK,FSQPEEPIDWDYR,AFDEVNTQLQTK,EIADVQKIEK,FDALLVELK                        | ATP synthase subunit d                                             | 1,0596  | 1,3528  | 1,2758  | 0,18663468 | 0,04520429 | 0,15355836 |
| Q96252 | AT5G47030.1 | 3  | LASATTDLEK,LTNVFVLPYTSLETGK,GLAEFQK                                              | ATP synthase subunit delta'                                        | 0,96184 | 1,5641  | 1,6288  | 0,40683029 | 0,03931545 | 0,04767472 |
| Q96251 | AT5G13450.1 | 11 | IDPSYVGLVFEQDK,DPSVVR,ELTQLEIGAGK,NFLSLAENKG,VLDMSIR,IETDSEMIEMAK,VLVTTVI        | ATP synthase subunit O                                             | 0,94862 | 1,07    | 1,129   | 0,44832611 | 0,2372411  | 0,28053259 |
| Q3ZVE1 |             | 1  | TAVATDTIINQQGNVICVVAEQK                                                          | ATPase alpha subunit                                               | 1,1015  | 1,1591  | 1,0523  | 0,31540618 | 0,21714644 | 0,38556112 |
| Q9C522 | AT3G06650.1 | 2  | EVTPPQIPDELSSAIK,DLVLSVSGLLTIGPR                                                 | ATP-citrate lyase B-1                                              | 1,3284  | 1,0635  | 0,86347 | 0,38437408 | 0,40708656 | 0,45165109 |
| Q9P156 | AT5G50920.1 | 5  | VPEPTVEDTIQIK,VVQILGR,VITLMDGLVAGTK,YTDESIVAAAQLSYQYISDR,IIGQDEAK,EIADILKK,M'    | ATP-dependent Clp protease ATP-binding subunit ClpC                | 0,73126 | 0,96222 | 1,2916  | 0,08941395 | 0,088429   | 0,34243189 |
| P56772 |             | 1  | SPGEGDTSWVDIYR                                                                   | ATP-dependent Clp protease proteolytic subunit 1                   | 0,66695 | 0,62144 | 0,93176 | 0,08819529 | 0,04179326 | 0,35110449 |
| Q94B60 | AT5G45390.1 | 2  | ADVSTIALGIAASTASILGAGTK                                                          | ATP-dependent Clp protease proteolytic subunit 4                   | 1,1317  | 0,98692 | 0,93    | 0,14408762 | 0,05865764 | 0,26061733 |
| Q95834 | AT1G02560.1 | 1  | FQSIISQLFQYR                                                                     | ATP-dependent Clp protease, protease subunit                       | 0,81046 | 0,86129 | 0,99857 | 0,11940032 | 0,03089351 | 0,17890785 |
| Q94B72 |             | 1  | LAFDFWNLK                                                                        | Auxin-induced in root cultures protein 12                          | 0,40817 | 1,4602  | 3,6468  | 0,01347706 | 0,08709742 | 0,00279604 |
| Q9LVA0 | AT5G62390.1 | 4  | SMVDLEFAMLDVVDQPPQDK,LDLDDYPTCTLPIR,SYNWTTEVK,ENGEVSHYTIK                        | BCL-2-associated athanogene 7                                      | 0,58528 | 0,83615 | 1,4286  | 0,04967535 | 0,18306382 | 0,09812982 |
| Q94CF4 | AT1G70410.2 | 3  | ADLGNVAAAK,HSVGVAAYEYAVHLK,ELDSSNSDAIER,VCPSHLNFQPEAFVYR,NSTLNFHLAK              | beta carbonic anhydrase 4                                          | 0,65818 | 0,65818 | 0,68336 | 0,21184587 | 0,01050728 | 0,0362066  |
| Q9SFE0 | AT1G52400.3 | 10 | YYQR,GSYDYGVMNMYYSFAK,DLNTOAFR,SPSWTTSLDVSDWSK,HWITFNEPWFVSR,VLDFILGWHL          | beta-glucosidase 18                                                | 0,76993 | 0,95244 | 1,2492  | 0,29525989 | 0,31597334 | 0,19615166 |
| Q9FIW4 | AT5G36890.1 | 1  | FGVLVNDYK                                                                        | beta-glucosidase 42                                                | 1,0067  | 0,79263 | 0,79116 | 0,47480938 | 0,14294724 | 0,15782318 |
| Q9M649 | AT4G23460.1 | 1  | GLEALK                                                                           | beta-adaptin-like protein C                                        | 0,9081  | 0,96427 | 1,0619  | 0,3155282  | 0,40046469 | 0,36998444 |
| Q43866 | AT3G13790.1 | 3  | ISLDDTK,SGLGPPFLMVLASK,QLIQWIPVR,GWSGIQTPNR,NQQVQNAIEPK                          | beta-fructofuranosidase                                            | 1,5131  | 2,1804  | 1,474   | 0,11932159 | 0,01158974 | 0,07150049 |
| Q9FN08 | AT5G63810.1 | 3  | CLTGGEPSQR,IWTENWPGWFK,HYMEFSFTYVNLNK                                            | beta-galactosidase 10                                              | 0,74278 | 0,6933  | 0,9334  | 0,13337707 | 0,07231508 | 0,35485881 |
| Q9C525 | AT1G66270.1 | 10 | DSNDAPTVSR,EAYLVSHLLNHAHAEEVFR,DFLAQGVRRPSALK,QDLSVSWEPK,LGTTDSVDVGTADHN         | beta-glucosidase 21                                                | 1,0051  | 2,3147  | 2,342   | 0,3146579  | 0,00697307 | 0,02006469 |
| Q98Y89 | AT1G66280.1 | 7  | QDLSVAWVEPK,DFLGGQVRRPSALK,GPALWDFDK,CSGNHNDVAVDVFR,NVDHSAIGSQPLTALPVYAK         | beta-glucosidase 22                                                | 0,89849 | 1,8684  | 2,0865  | 0,34411499 | 0,01255004 | 0,01684929 |
| Q95R37 | AT3G09260.1 | 25 | DFLQSGVRRPSALK,HWITFNEPWFVSHAGVDYK,YANPEMIMEMNGVEGLGASDVAVGTADHN,SGYE            | beta-glucosidase 23                                                | 0,87152 | 0,84118 | 0,96606 | 0,26113057 | 0,2397083  | 0,48558152 |
| Q9LV33 | AT3G18080.1 | 7  | DFADYAEFCYK,DFHIGWFIHPLVYGEYK,LNFDFYDR,DLGQQDQWNVVEFGAK,GFVGTATSAYQVEGETH        | beta-glucosidase 44                                                | 1,0448  | 0,84237 | 0,83035 | 0,41535462 | 0,20112602 | 0,18846418 |
| Q93Y07 | AT3G06510.1 | 3  | LVETDESEYGR,FGLVAVDR,TLIWLPMIK                                                   | beta-glucosidase-like SFR2                                         | 1,2403  | 1,6809  | 1,3154  | 0,11932159 | 0,01354858 | 0,0830313  |
| Q8L756 | AT1G65590.1 | 2  | VIELMTPWNIDQPR,LSHVISGDR                                                         | beta-hexosaminidase 3                                              | 0,57    | 0,70622 | 1,239   | 0,04661118 | 0,07885575 | 0,17416837 |
| Q8L9C4 | AT1G67730.1 | 6  | GLNLLVAR,AFAPQLAQK,ASFLVASPEGYAK,YFHEVDEELINLTK,YGSVAITGPTDGIK                   | beta-ketocetyl reductase 1                                         | 0,96486 | 0,93551 | 0,98511 | 0,2218635  | 0,44357684 | 0,19459657 |
| Q9FGY1 | AT5G49360.1 | 1  | LIGGGYEWSEALHGSDVGPQK                                                            | beta-xylosidase 1                                                  | 0,53568 | 0,2499  | 0,4665  | 0,03827781 | 0,00069138 | 0,02006469 |
| Q9SK10 | AT2G10940.2 | 4  | ALDNLVYVPALQLLTCGK,LGACVDLGGVLK,IGLGDPAVVK                                       | bifunctional inhibitor/lipid-transfer protein/seed storage 25 albu | 0,73488 | 0,49141 | 0,68195 | 0,14959475 | 0,012231   | 0,05963097 |
| Q1JPL7 | AT1G11580.1 | 4  | ITASSDLAPVK,EAQFTVAK,DATITIGSLNVIDGSTFR,VYANVYVAAK                               | bifunctional pectinesterase 18/RNA N-glycosylase                   | 0,87615 | 2,0185  | 2,3038  | 0,26767321 | 0,01461739 | 0,01568383 |
| Q9L282 | AT5G04430.1 | 3  | FLVNSAAGSIVGK,NQEFFGTDR,LVVPNSSCGGIK                                             | binding to TOMV RNA 1L (long form) protein                         | 0,77046 | 1,3583  | 1,763   | 0,15250811 | 0,09725565 | 0,04052356 |
| Q8H765 |             | 1  | VLGTDENAVYLNK                                                                    | Casein kinase II subunit alpha-2                                   | 2,8638  | 2,1468  | 0,74962 | 0,00649404 | 0,01140342 | 0,12919191 |
| Q94A77 | AT4G32300.1 | 5  | VLFDEGDGPR,DLVATLAPLQTK,VTPEVSVYSGTVLDDLSGK,FSTEEATVVELASQCLQYEPK,SLVCLYCD       | BR-signaling kinase 1                                              | 0,99275 | 0,81621 | 0,84032 | 0,34524541 | 0,13401989 | 0,11720508 |
| Q95ZR1 | AT4G29900.1 | 3  | SDIILDDNFESVVK,NEQGGPFGIGK,SESEIGIQVSGSPTR                                       | Ca2+-transporting ATPase                                           | 1,3537  | 1,5247  | 1,095   | 0,23630779 | 0,14691503 | 0,36629974 |
| Q22218 | AT2G41560.1 | 2  | ITSIDIEHGFASEALR,INVFK,NIAGQSVYVQLGILNFAGK                                       | Ca2+-transporting ATPase                                           | 1,0593  | 0,80419 | 0,75447 | 0,3767835  | 0,13272107 | 0,1252794  |
| Q9M2L4 | AT3G57330.1 | 3  | VVDNSGVSPLSEK,IASJSDVIEGFASEALR                                                  | Ca2+-transporting ATPase                                           | 0,96406 | 1,1949  | 1,2461  | 0,36922949 | 0,16711671 | 0,14437568 |
| Q8LEM7 | AT4G26570.1 | 1  | ETVFSVEIEALYELFK                                                                 | calceineurin B-like 3                                              | 0,91798 | 0,78295 | 0,8529  | 0,33099788 | 0,1316135  | 0,2293484  |
| Q9FN48 | AT5G23600.1 | 6  | NCVITDGFSGGR,VISIPLELPNK,TVTVEAQQTK,LGTDSYNFSFAQLVSPSR,GDLQPTLDLCTK,VFQ'         | calcium sensing receptor                                           | 0,9916  | 1,4411  | 1,495   | 0,46816001 | 0,10533992 | 0,12344714 |
| Q9XIR0 | AT1G64850.1 | 1  | ANLTFEELYAVLLVYNDIK                                                              | calcium-binding EF-hand-containing protein                         | 11,368  | 1,9263  | 0,16944 | 1,06E-05   | 0,01800598 | 9,25E-05   |
| Q23050 | AT1G05150.1 | 1  | LIALLDSSGSR                                                                      | Calcium-binding tetrapeptide family protein                        | 0,66759 | 0,86331 | 1,2932  | 0,08839531 | 0,21781    |            |

|        |             |    |                                                                                |                                                              |         |         |         |            |            |            |
|--------|-------------|----|--------------------------------------------------------------------------------|--------------------------------------------------------------|---------|---------|---------|------------|------------|------------|
| Q95FU6 | AT3G07160.1 | 2  | LELVQWPLFLSSK,VLGSVLEQLAK                                                      | callose synthase                                             | 0,62121 | 1,0036  | 1,6361  | 0,04823352 | 0,38370679 | 0,05476911 |
| Q95JM0 | AT2G36850.1 | 2  | ALIEVLELVSR,IDENAVNEVFLK                                                       | callose synthase 10                                          | 0,85454 | 1,1252  | 1,3273  | 0,21721359 | 0,2395332  | 0,11896564 |
| Q92782 | AT4G03550.1 | 1  | VVVNLQSLYEIATR                                                                 | callose synthase 12                                          | 1,2132  | 1,4219  | 1,1721  | 0,20541826 | 0,077212   | 0,2297029  |
| Q95TW1 | AT4G24330.1 | 4  | NFSSLGVEGEDSPLLK,LIALIIPYYIDLGR,ENENLALWASK,FALPDK                             | uncharacterized protein                                      | 0,35208 | 0,31726 | 0,90109 | 0,00649404 | 0,00229085 | 0,29503313 |
| P29402 | AT5G61790.1 | 11 | SEGHEYGLLVSEK,ELDEPLNLK,YLRPQEAQWTPGQFDSFSPYMSIFGPDK,AEFEAAGSADGL,IETELIK,N    | calnexin 1                                                   | 1,9041  | 2,7192  | 1,3059  | 0,12801913 | 0,10453019 | 0,45590666 |
| Q38798 | AT5G07340.1 | 2  | VFDLLYK,GNLSAEDFPELIPSK                                                        | calnexin2                                                    | 1,1985  | 1,0493  | 0,87552 | 0,21662245 | 0,37511822 | 0,2580432  |
| O04151 | AT1G56340.1 | 4  | YVGVLEWQVK,QTGSLSDWDLPLAK,LLSDDVDQTK,EAETDAAHDEL,SGSLFDNVLSDDPYAK              | calreticulin-1                                               | 1,2027  | 1,2806  | 1,1102  | 0,36417609 | 0,1318416  | 0,20888524 |
| O04153 | AT1G08450.1 | 2  | IEQDIECGGAYIK,AGSFONILICDDPAYAR                                                | calreticulin-3                                               | 1,7971  | 2,1114  | 1,2817  | 0,17788236 | 0,02004869 | 0,07873399 |
| Q9LZQ4 | AT3G62360.1 | 8  | IGSANNQIER,ISFVQDSR,SSIDVNVGTEDIK,VLGVAGGVECLIK,VALLSQGPQGEVAIEAR,TVLTVDESSQF  | carbohydrate-binding-like fold-containing protein            | 1,0282  | 1,3017  | 1,2594  | 0,35896271 | 0,09255401 | 0,15245963 |
| P27140 | AT3G01500.2 | 6  | VISELGDFAFEDQCGR,DVATILHWK,GGYDVFVK,AFDPVETIK,VCPSHVLDFQPGDAFVVR,YGVGAAIEY     | carbonic anhydrase 1                                         | 0,99926 | 0,77796 | 0,82159 | 0,21520133 | 0,09060668 | 0,25175877 |
| Q3E9H5 | AT5G14740.1 | 5  | VLAESSAFEDQCGR,YAGVAAIEYAVLHK,VCPSHVLDFQPGDAFVVR,ITAELOQAASSSDSK               | carbonic anhydrase 2                                         | 0,84275 | 0,65196 | 0,7736  | 0,22262747 | 0,05301425 | 0,14531065 |
| P42737 | AT5G14740.2 | 4  | VLAESSAFEDQCGR,YAGVAAIEYAVLHK,ITAELOQAASSSDSK                                  | carbonic anhydrase 2                                         | 0,78156 | 0,56745 | 0,76332 | 0,09951543 | 0,01688601 | 0,12730146 |
| P32826 | AT3G10410.1 | 1  | FLNLQSVR                                                                       | carboxypeptidase                                             | 0,64127 | 0,88586 | 1,3814  | 0,07413148 | 0,25211857 | 0,11381838 |
| Q27G18 | AT5G23210.2 | 1  | DSYNFLVNWFK                                                                    | carboxypeptidase D                                           | 0,95937 | 0,88461 | 0,92207 | 0,40683029 | 0,25032609 | 0,3339265  |
| Q0WPR4 | AT5G23210.1 | 1  | GLMIGNALLDDETDK                                                                | carboxypeptidase D                                           | 0,88953 | 0,59419 | 0,66798 | 0,28952208 | 0,0325878  | 0,07927577 |
| O65572 | AT3G63520.1 | 9  | FYVLPFR,GYDLEGGR,LLDILLER,DELMIR,LSASAVDFPR,INCEYTKG,VPYGFHALFVTEEQLEQQLI,MLEV | carotenoid cleavage dioxygenase 1                            | 1,1154  | 0,94168 | 0,84429 | 0,29841028 | 0,34935543 | 0,21796349 |
| Q42267 | AT5G17020.1 | 1  | LIQNDQEMIK                                                                     | Carrier protein                                              | 1,0231  | 5,5722  | 6,3463  | 0,49709532 | 0,05872587 | 0,07871651 |
| Q95MV6 | AT5G17020.1 | 1  | NYSEVIVLSSNEASFRR                                                              | exportin 1A                                                  | 0,35214 | 0,47649 | 1,3531  | 0,00649404 | 0,01223283 | 0,12375524 |
| Q9LFF3 | AT5G15450.1 | 1  | AIDLVDDEAAK,WNLQIQOQR                                                          | casein lytic protease B3                                     | 0,87636 | 1,5869  | 1,9179  | 0,3383915  | 0,0693958  | 0,06387722 |
| P25519 | AT4G35090.1 | 4  | YPTTPAVCGSK,GRILLDEPHYLVK,ITHER,EGNFDLGNNVFPFVIR,TWPEIDLPLDPVGR                | catalase 2                                                   | 1,3015  | 1,0249  | 0,80224 | 0,17677818 | 0,4485652  | 0,17667834 |
| Q42547 | AT3G20620.1 | 10 | VANFR,DEENIYPSK,TNIQYWR,WVEISEPR,LTHER,HMEGFGVHTYLLAK,DGIQFPDVVHALKPNPK        | catalase 3                                                   | 1,7492  | 1,0835  | 0,60221 | 0,03918435 | 0,25069453 | 0,0571781  |
| Q9C5D6 | AT1G05940.1 | 2  | SLASAVALLEFPALK                                                                | cationic amino acid transporter 9                            | 0,53185 | 1,7047  | 3,2053  | 0,0374089  | 0,03085824 | 0,00380368 |
| Q9S185 | AT1G62630.1 | 1  | VATVEDIITLFR                                                                   | CC-NBS-LRR class disease resistance protein                  | 0,53964 | 1,0573  | 1,9593  | 0,0390965  | 0,35819229 | 0,0277267  |
| Q8LBA6 | AT1G68000.1 | 1  | DSTSWLFR                                                                       | CDP-diacylglycerol-inositol 3-phosphatidytransferase         | 0,98436 | 1,1785  | 1,1972  | 0,45993579 | 0,1985399  | 0,20692895 |
| B9D155 | AT3G09840.1 | 1  | DFSTAILER                                                                      | cell division control protein 48-A                           | 1,0655  | 1,9464  | 1,8268  | 0,36754088 | 0,01738877 | 0,0355902  |
| Q9FGM0 | AT5G53170.1 | 1  | LVSDETVSELETNDR                                                                | cell division protease ftsH-11                               | 0,87713 | 1,6911  | 1,928   | 0,26938059 | 0,03205345 | 0,03006281 |
| Q84WU8 | AT2G29080.1 | 2  | FAPTLMLLTGLUYGR                                                                | cell division protease ftsH-3                                | 0,79778 | 2,0318  | 2,7142  | 0,13560953 | 0,01421162 | 0,0079484  |
| Q9FH02 | AT5G42270.1 | 2  | DGSLVLQTAVDNR,GGQGGAGGPGGLGPMDFGR                                              | cell division protease ftsH-5                                | 1,1769  | 1,112   | 0,93925 | 0,24243794 | 0,32151554 | 0,34438321 |
| Q8W585 | AT1G06430.1 | 1  | AYEIALSQIR                                                                     | cell division protease ftsH-8                                | 1,0708  | 1,6857  | 1,5743  | 0,36149069 | 0,03240953 | 0,0659499  |
| Q0WVU4 | AT3G19820.3 | 12 | TWVDVYFK,CLYWEGK,GAITFMSVYK,GOIPEFGEYENR,YLWGMLMPK,LILPFGDQFWR,VGDALEV         | cell elongation protein DIMINUTO                             | 0,85823 | 0,87345 | 1,0346  | 0,36257523 | 0,30424444 | 0,45316148 |
| O48946 | AT4G32410.1 | 1  | INALVAK                                                                        | cellulose synthase A catalytic subunit 1 [UDP-forming]       | 1,2318  | 1,5215  | 1,2365  | 0,19348061 | 0,0543413  | 0,17307293 |
| B8ZK9  | AT1G55850.1 | 3  | ALASCTYEENTQWKG,EGNTAIPTLVLSR,ANCLDSSAAEEAVK,EIAFVQFPQCDNVTR                   | cellulose synthase-like protein E1                           | 0,86635 | 1,2656  | 1,464   | 0,21738085 | 0,16177995 | 0,08680609 |
| P41088 | AT3G55120.1 | 1  | LLEAEVLSIGK                                                                    | chalcone-flavanone isomerase 1                               | 1,2456  | 5,1023  | 4,0962  | 0,18321838 | 0,00024074 | 0,0008235  |
| Q84VQ4 | AT5G21430.1 | 1  | NCSYDQVTIGYK                                                                   | chaperone DnaJ-domain containing protein                     | 1,1643  | 1,095   | 0,94044 | 0,2412962  | 0,29657824 | 0,36785181 |
| Q7XAR9 | AT5G42480.1 | 1  | ILAAAGVIGLSFSQK                                                                | chaperone DnaJ-domain containing protein                     | 0,98186 | 0,3395  | 0,34577 | 0,45449884 | 0,00271908 | 0,00626206 |
| Q39079 | AT2G35720.1 | 1  | AQQLQTVATR                                                                     | chaperone protein dna1 13                                    | 1,0873  | 1,5643  | 1,4386  | 0,33405095 | 0,04778386 | 0,09532433 |
| Q3EQA4 | AT3G44110.2 | 1  | SNPGEVVKPDSYK,VSLDEDVLTGMK                                                     | chaperone protein dna1 3                                     | 1,3247  | 1,497   | 1,282   | 0,20006354 | 0,07284323 | 0,22202096 |
| Q94AW8 | AT3G44110.1 | 1  | SNPGEVVKPDSYK                                                                  | chaperone protein dna1 3                                     | 0,93521 | 0,96805 | 1,0351  | 0,36304362 | 0,40965488 | 0,42018922 |
| Q9S187 | AT2G38000.1 | 1  | ETQVLVNSPSTVEK                                                                 | chaperone protein dna1-like protein                          | 0,58047 | 0,74156 | 1,2775  | 0,04823352 | 0,10051964 | 0,15355836 |
| Q9S1F2 | AT2G04030.1 | 2  | GVVSDSDLPLNVSRR,NYSQFVGFPIYTWQEK                                               | Chaperone protein htpG family protein                        | 0,83827 | 0,8447  | 1,0077  | 0,21912883 | 0,19358982 | 0,48115087 |
| O65282 | AT5G20720.3 | 4  | TAGGLLTTTETK,YAGTEVEFNDVK,ITPLPVGSTGVLSYK,EDDVGILETEDI                         | chaperonin 20                                                | 1,4349  | 1,4188  | 0,98879 | 0,10667054 | 0,0779512  | 0,40768998 |
| P29197 | AT3G23990.1 | 6  | IGGSAEAEVGEK,NVWIEGWSGAPK,CELDPLILIEHK,TALVDAASVSLTTTAAVVLDLPK,GYTSFYFITNQI    | chaperonin CPN60                                             | 1,6382  | 1,6303  | 1,1373  | 0,18321838 | 0,0118808  | 0,04699989 |
| Q8L7M5 | AT2G33210.1 | 4  | TALVDAASVSLTTTAAVVTEIPTK,CELDPLILIEHK,AAVEIGVPGGGVALLVASK,LSANFDQK             | chaperonin CPN60-like 1                                      | 1,9602  | 3,4675  | 1,8746  | 0,06099168 | 0,00087078 | 0,01546244 |
| Q93ZM7 | AT3G13860.1 | 3  | AAMLQGVSEVAEAVK,VDALNATR,ALDNLQETENEDQR                                        | chaperonin CPN60-like 2                                      | 1,0403  | 1,8426  | 1,7712  | 0,40976466 | 0,02168291 | 0,03974886 |
| P21238 | AT2G28000.1 | 15 | HGLLSIVSGANVPSLK,LADCVGLTLGR,VGAATELEDR,AAHQAGIDK,AVASISAGNDDLLIGSMIADAIDK     | chaperonin 60alpha                                           | 1,1778  | 0,94399 | 0,7666  | 0,13996266 | 0,07596297 | 0,35059684 |
| O96282 | AT5G49890.1 | 1  | APVGGVLFALAEASWWR                                                              | chloride channel protein CLC-c                               | 0,25646 | 0,881   | 3,4353  | 0,00177495 | 0,24489993 | 0,00266607 |
| Q7M1L1 | AT2G07200.3 | 1  | LGALCVFPELLAR                                                                  | Chlorophyll a/b-binding protein type I                       | 0,8256  | 0,93899 | 1,1696  | 0,36417609 | 0,39518157 | 0,4365101  |
| P04777 | AT1G29920.1 | 5  | YLGPFSGSPSYLTGEFFPGDVGWDTAGLSADPETFAR,GPENLADHLADPVNNNAWAFATNVPVKG,VAGN        | chlorophyll a-b binding protein 2/3                          | 0,82214 | 0,84068 | 1,0223  | 0,22731052 | 0,20911579 | 0,46793219 |
| P27521 | AT3G47470.1 | 9  | WVQAEVLNRR,IGINNPEVYDAGK,LAMLAFLGFVQVHNVTKG,GEVYVGGIFNPLNFAPQDEAK,WAM          | chlorophyll a-b binding protein 4                            | 1,312   | 1,3559  | 0,99988 | 0,17134952 | 0,11764001 | 0,42312141 |
| Q9K9F9 | AT4G10340.1 | 18 | YGANKCFEAVWFK,SEFPEYLNGEVAGDYVDFPGLK,WAMLGAAGFIPEALNK,HLSDFGNNLLTVIAGT         | chlorophyll a-b binding protein CP26                         | 2,2263  | 2,7796  | 1,0642  | 0,36225386 | 0,27777756 | 0,41886769 |
| Q07473 | AT5G01530.1 | 6  | STFPGPYSEVQDR,TACLQLAIEIK,LAMVAFGLFVAVAAATGK,NLAGDVGTR,FDPLLAADPEK             | chlorophyll a-b binding protein CP29.1                       | 1,231   | 1,1711  | 0,92647 | 0,41872923 | 0,3657488  | 0,45590666 |
| Q9K788 | AT2G08940.2 | 5  | AQLQLAIEIK,FDPLGLASDPYK,TVSDRPLVWFKAK,NLYGEVIGTR,LAMVGFGLFAVQAAATGK            | chlorophyll a-b binding protein CP29.2                       | 1,0306  | 1,0165  | 0,93528 | 0,29763493 | 0,09798439 | 0,19116842 |
| Q95W11 | AT2G40100.1 | 2  | YPPGCVDFPLGLAADPEK,GPVSLFTFN,N,GDFPGLGKPAEYLQYDFDGLDQNLAK                      | chlorophyll a-b binding protein CP29.3                       | 1,2247  | 1,5401  | 1,2216  | 0,23646531 | 0,10801739 | 0,26095203 |
| Q38833 | AT3G51820.1 | 2  | YQASAPFLV,GIQVETALASGH,ALGLQSLPVAFGTETAK                                       | chlorophyll synthase                                         | 1,1594  | 1,2013  | 1,0362  | 0,245877   | 0,17847855 | 0,41886759 |
| Q22527 | AT1G19670.1 | 2  | LLPPGGOVEVDAGSVINWASENLK,SVFGVIVVAFLK                                          | chlorophyllase 1                                             | 1,0869  | 0,95428 | 0,94794 | 0,08482301 | 0,19026959 | 0,15627224 |
| Q95TW6 | AT4G24280.1 | 1  | VVDWLAEFK                                                                      | chloroplast heat shock protein 70-1                          | 1,1808  | 1,2699  | 1,0719  | 0,24318492 | 0,23708007 | 0,45982422 |
| Q93WG3 | AT1G08640.1 | 1  | SFEAPSSPYNEEGEESGR                                                             | Chloroplast J-like domain 1-containing protein               | 1,4074  | 1,7242  | 1,2251  | 0,11445402 | 0,02912464 | 0,18361577 |
| O80565 | AT2G43950.1 | 2  | HVSLVYVEEK,VTSEFDSDSLFLNK                                                      | chloroplast outer envelope protein 37                        | 0,99442 | 0,94141 | 0,94669 | 0,48619109 | 0,34889454 | 0,37789765 |
| Q91Y49 | AT3G63140.1 | 10 | ELLSAGHAVITLTYGDESEK,ILEALK,DLSSMLTSAVANPEAASGNFNCVSDR,DLDTVRPVVDWAK,DLG       | chloroplast stem-loop binding protein-41                     | 1,1033  | 0,96815 | 0,8775  | 0,31373782 | 0,40972098 | 0,26059071 |
| Q95RH6 | AT3G01290.1 | 11 | LNDDVFEQK,LQQLDQCETK,ASDAFVR,DVLDMMVMVTQYFDTMR,VLNPLGFQVVPVWGDVYAGTLLT         | Hypersensitive-induced response protein 3                    | 2,7526  | 2,0264  | 0,83725 | 0,00688603 | 0,00741687 | 0,20692895 |
| O49340 | AT5G01530.1 | 1  | ICRGINLALGLVEVTANLVGR                                                          | Cytochrome P450 71A12                                        | 2,7992  | 4,0257  | 1,4382  | 0,00688603 | 0,00068018 | 0,09537584 |
| P48523 | AT3G19450.1 | 2  | LADSLDIHYDVPVHFPLDYPVLAACK,GLTSTIETVK                                          | cinnamyl alcohol dehydrogenase 4                             | 1,2203  | 1,1496  | 0,94212 | 0,20006354 | 0,22817556 | 0,37046625 |
| Q0WUX6 | AT2G42790.1 | 1  | NLADEVFSIVK                                                                    | citrate synthase 3                                           | 1,24    | 1,5055  | 1,2081  | 0,18561901 | 0,06361783 | 0,21316325 |
| P20115 | AT2G44350.2 | 2  | VPVVAAYVVR,VLPTAQSGAEPLEGLWLLTKG                                               | citrate synthase 4                                           | 0,86999 | 1,4051  | 1,6859  | 0,18877558 | 0,09297249 | 0,04773426 |
| Q9FPF0 | AT3G14990.1 | 4  | ATTHPVSDK,LVAEVLDEVAEK,LAATCATAVESR,TVLPIAHGTEPLEAVAMITVLR                     | class I glutamine amidotransferase domain-containing protein | 0,96163 | 0,81947 | 0,88916 | 0,3847187  | 0,30839936 | 0,43108996 |
| P10798 | AT5G38410.1 | 1  | QVQCISFIAYKPPSFEA                                                              | ribulose biphosphate carboxylase small chain 3B              | 0,35817 | 0,35232 | 0,98367 | 0,00688603 | 0,00310132 | 0,45820061 |
| Q0WLB5 | AT3G08530.1 | 1  | WLVLLGIAPGSPER                                                                 | Clathrin, heavy chain                                        | 1,1051  | 1,9267  | 1,7435  | 0,31147744 | 0,01800598 | 0,04246453 |
| Q0WV16 | AT3G11330.1 | 5  | VEEDAVVQAVK,IYAFISNNAK,ADDDTQFLEVIR,ASEDNTVYDDLVR,WLVLLGIAPGSPERPLVK           | Clathrin, heavy chain                                        | 1,0252  | 1,2509  | 1,2582  | 0,3155282  | 0,08821698 | 0,16132595 |
| Q94A40 | AT1G62020.1 | 2  | VVDIGALR,TLGQTR                                                                | coatomer subunit alpha-1                                     | 0,62578 | 0,80797 | 1,2911  | 0,06532174 | 0,15341453 | 0,14567479 |
| Q9S179 | AT2G21390.1 | 6  | PPALVDFDSQLEAK,GIQGTFR,LAIELGDNVPSPELQK,SLDNTPTIESQAR,VFSLIQITPLVVESER         | coatomer subunit alpha-2                                     | 0,9735  | 1,0041  | 1,0604  | 0,15102512 | 0,30146007 | 0,21194888 |
| Q9CAA0 | AT1G79990.3 | 1  | SFDVTELPVR                                                                     | coatomer subunit beta-1                                      | 1,2276  | 1,6121  | 1,3132  | 0,19432574 | 0,04138367 | 0,13614308 |
| Q9S172 | AT4G31480.2 | 3  | NAILAIMSYK,LLDFTYQIR,AVNVLNSVDK                                                | coatomer subunit beta-2                                      | 1,6288  | 1,866   | 1,1456  | 0,06099168 | 0,02063113 | 0,25418836 |
| B9DGK9 | AT5G05010.2 | 2  | QSNILEDLATTLLSK                                                                | coatomer subunit delta                                       | 1,2609  | 2,2945  | 1,6539  | 0,11207126 | 0,35095504 | 0,12852101 |
| B9DHT9 | AT4G34450.1 | 10 | QITNFMDSIADFEK,VEATEVFSVTK,ELTPAIQTLFLSSPPRVL,IDGTLTQIER,GAVLQEAR,AIVDSIVTI    | coatomer subunit gamma                                       | 0,8538  | 1,1965  | 1,3766  | 0,15302081 | 0          |            |

|        |             |    |                                                                              |                                                                  |         |         |         |            |            |            |
|--------|-------------|----|------------------------------------------------------------------------------|------------------------------------------------------------------|---------|---------|---------|------------|------------|------------|
| Q9LEW2 |             | 2  | LSFPSQTATAYNKLPISPTVFSTPGALIDSGTVTR                                          | nucleoid DNA-binding protein cnd41-like protein                  | 0,36835 | 0,48857 | 1,3264  | 0,00766485 | 0,01383439 | 0,13180052 |
| P38605 | AT2G07050.1 | 9  | IAEFGSPWLR,NSQVLEDCPDGDLNYYWR,TAIEHHIYEDNTR,QQPSGGWGESYLSQDK,VYSNLDGNR,F     | cycloartenol synthase                                            | 1,0481  | 1,1124  | 1,0613  | 0,39433221 | 0,27314825 | 0,37046625 |
| Q9LM02 | AT5G13710.2 | 2  | EIFTPMYFLAR,YSNLFLEQAAGLVGDR,VLVDGCGGILTR                                    | cycloartenol-c-2-methyltransferase                               | 1,1673  | 2,4011  | 2,0892  | 0,21184587 | 0,00759839 | 0,02908101 |
| P55217 | AT3G01120.1 | 1  | ADILQALEAI                                                                   | cystathionine gamma-synthase                                     | 1,1664  | 1,5948  | 1,3673  | 0,23936463 | 0,04359913 | 0,11842417 |
| Q0WWF3 | AT4G39090.1 | 1  | APILPTEINLEPFDWR                                                             | cysteine proteinase RD19a                                        | 0,76638 | 1,2617  | 1,6464  | 0,14959475 | 0,13839266 | 0,05485971 |
| P43297 | AT1G47128.1 | 5  | SWEGSGYLR,CGAIEPSPVK,AVAHQPSIAIEAGGR,GVDGTCDQIR,VVTIDSYEDVPTYSEESLK          | cysteine proteinase RD21a                                        | 1,096   | 1,0959  | 0,98491 | 0,21902323 | 0,16408394 | 0,44368492 |
| P47999 | AT2G43750.2 | 1  | YLSQLFQSR                                                                    | cysteine synthase                                                | 0,82736 | 0,77727 | 0,93946 | 0,20935831 | 0,12693655 | 0,36664065 |
| Q95757 | AT3G61440.1 | 3  | YLSVDFDEL,TPLVFLNK,SFGAELVTDPAK,YTEGCEAYAAK                                  | cysteine synthase C1                                             | 1,4384  | 1,351   | 0,92966 | 0,11816398 | 0,16136326 | 0,2610145  |
| Q8GYA4 | AT4G23180.1 | 1  | YSNQNLSTLTTGGVLLNTR                                                          | cysteine-rich receptor-like protein kinase 10                    | 1,4499  | 1,3333  | 0,91958 | 0,1020706  | 0,10726857 | 0,32893826 |
| Q9LR19 | AT3G22060.1 | 2  | CSDIEGFSFK,SCLETAIFELR                                                       | cysteine-rich repeat secretory protein 38                        | 1,1952  | 1,4565  | 1,2187  | 0,21818685 | 0,06889857 | 0,1886216  |
| Q9LV60 | AT5G48540.1 | 1  | VYGLAQR                                                                      | cysteine-rich repeat secretory protein 55                        | 1,4889  | 3,7318  | 2,5064  | 0,09180655 | 0,0009503  | 0,01166119 |
| P42792 |             | 3  | DVEGGWLLR,IAFYPPYVVK,GIPNSYTDDETHT                                           | Cytochrome b                                                     | 1,0194  | 1,3228  | 1,2976  | 0,45267591 | 0,11129187 | 0,1439429  |
| Q42342 | AT5G53560.1 | 4  | YFGEIDSSVPATR,TYVAPOQPAYNQDK,VLSEFEVSK,DATNDFEDVGHSDTR                       | cytochrome b5 isoform 1                                          | 1,6709  | 1,7218  | 1,1567  | 0,32343528 | 0,20024699 | 0,14773663 |
| Q9FDW8 | AT1G26340.1 | 1  | YFGEIDSSLPPELKK                                                              | cytochrome b5 isoform A                                          | 0,65433 | 0,85683 | 1,3095  | 0,08067319 | 0,20850578 | 0,13799311 |
| Q9ZWT2 | AT5G48810.1 | 2  | DCWIIDGK,FLDDHPGGDEVILTSGK,AMLDEYVGGIDTATVPVK                                | cytochrome b5 isoform D                                          | 0,72579 | 0,89547 | 1,1844  | 0,11399376 | 0,14149413 | 0,28053259 |
| P56779 |             | 3  | SFADITSIR,QGILPTIGR,FDSLQLEDFSR                                              | Cytochrome b559 subunit alpha                                    | 1,4599  | 1,9388  | 1,3269  | 0,23075357 | 0,15817724 | 0,40213088 |
| Q9SWS1 | AT5G38630.1 | 1  | VTFLOVNVQVTR                                                                 | cytochrome b-561                                                 | 1,5101  | 1,7073  | 1,1306  | 0,08466166 | 0,0307626  | 0,27044118 |
| Q96303 | AT2G38940.1 | 2  | EQLQVNLALDVAK,VLQVIEPEQK                                                     | inorganic phosphate transporter 1-4                              | 2,6498  | 1,8514  | 0,6987  | 0,00902119 | 0,02133519 | 0,09745137 |
| P56773 | ATCG00720.1 | 6  | IYTGVPDAIPVIGSIPVLELR,ESASVGSQSTLTR,YVDWFEER,LEIQAAIDITTS                    | cytochrome b6                                                    | 1,9376  | 1,8822  | 1,0316  | 0,14577531 | 0,07488229 | 0,32505166 |
| Q80725 | AT2G47000.1 | 5  | FPYDPSGEITLDQVEIK,FPDQAGDVLIDGINK,QQTGLVSGEIPFNCTIR,LSADAATIR,DVYFTYPARDEC   | ABC transporter 8 family member 4                                | 2,5087  | 2,7649  | 1,102   | 0,01009523 | 0,00286739 | 0,30638073 |
| Q9Z803 | AT4G03280.1 | 4  | FLFCHGSGVNAAGGR,DALGDNDVAALWIK,GPAPLSLALAHADIDEAGK                           | cytochrome b6-f complex iron-sulfur subunit                      | 1,5362  | 1,541   | 1,0278  | 0,05998686 | 0,03587438 | 0,48027602 |
| Q957L9 | AT1G22450.1 | 2  | FPTTNTQR,IVAFVEPTQAEVVK,QDTSAKPVEVK                                          | cytochrome C oxidase 6B                                          | 1,0485  | 2,082   | 2,0798  | 0,36464091 | 0,01738877 | 0,0355902  |
| P93285 |             | 2  | IIVTADLVHSAVPSLVK                                                            | Cytochrome c oxidase subunit 2                                   | 1,1546  | 2,0697  | 1,6491  | 0,33500193 | 0,0807164  | 0,05625382 |
| Q9SS88 | AT1G80230.1 | 1  | SFECPVCTQYFK                                                                 | cytochrome c oxidase subunit Vb                                  | 1,078   | 2,6622  | 2,4697  | 0,34845914 | 0,00395658 | 0,01197314 |
| Q9FKT8 | AT5G56090.1 | 1  | LALPVLINGITASGAFVAGNDAGR                                                     | cytochrome c oxidase subunit XV assembly protein                 | 0,79222 | 2,0156  | 2,5442  | 0,172787   | 0,01471271 | 0,01090936 |
| Q23138 | AT1G22840.1 | 1  | ADLIAYLK                                                                     | cytochrome C-1                                                   | 2,0458  | 4,6709  | 2,2831  | 0,02734734 | 0,00033184 | 0,01625845 |
| Q8LSZ1 | AT1G33811.1 | 2  | AYTPIQIQLANL,TYVDALAQILGFR                                                   | GDSL esterase/lipase                                             | 2,5715  | 1,5595  | 0,60646 | 0,0106699  | 0,04862524 | 0,05476911 |
| P56771 | ATCG00540.1 | 10 | GGEYITVDASNGR,LDQPLTSPNPNVGGFGQGDVAELQDLPR,YSEITFPILAPDPATNK,IGNLSFQNYRPNK,I | cytochrome f                                                     | 2,068   | 2,0736  | 0,94297 | 0,09425809 | 0,10833354 | 0,29315211 |
| Q9F19  | AT5G47990.1 | 7  | LFVNYVYAIR,FFNFPIVLSASTAYEIK,LIGISLFAK,LVQETDLPNLPQAVIK,GLVTIESFLTK          | cytochrome P450 705A5                                            | 1,7128  | 0,92139 | 0,54372 | 0,04306948 | 0,15790714 | 0,01867507 |
| Q8L7D5 | AT5G48005.5 | 3  | ESTSSVTSIAIK,APLPYFK,IJNLSKPEQATVDNDIMLGSSEWFSQPK                            | cytochrome P450 708A2                                            | 1,7396  | 1,0125  | 0,58204 | 0,04741018 | 0,46269536 | 0,04559256 |
| Q9FYC2 | AT3G44880.1 | 3  | VESSPGWFGQGDNDSPR,GAYNSFOILK,VLVGLSLSAASAYALHEQEK                            | phosphoribide a oxygenase                                        | 2,5419  | 2,5875  | 1,0179  | 0,01098118 | 0,00470436 | 0,45500202 |
| Q9M817 | AT1G52190.1 | 1  | SLFTGLAQIAVAAYK                                                              | putative peptide transporter                                     | 0,39512 | 0,28481 | 0,7208  | 0,0117442  | 0,00128936 | 0,11195408 |
| Q9LP6  | AT3G26300.1 | 1  | IDILLTGLQR                                                                   | cytochrome P450 71834                                            | 1,3168  | 1,0153  | 0,77104 | 0,14437791 | 0,45545505 | 0,14396051 |
| Q9LP3  | AT3G26330.1 | 1  | EGVEDFVDDLK                                                                  | cytochrome P450 71837                                            | 0,78839 | 1,0912  | 1,354   | 0,10367477 | 0,30606248 | 0,13180052 |
| Q8L6Z6 |             | 1  | LTFNFELVDDHLK                                                                | cytochrome P450 7185                                             | 0,65413 | 0,38127 | 0,58286 | 0,08067319 | 0,00431771 | 0,04560558 |
| P56774 | ATCG00730.1 | 2  | KPDLNDPVLRL,LLGVLLMVSVPAGLLTVPFLENVVK                                        | cytochrome b6/f complex subunit IV                               | 0,39674 | 0,49732 | 1,2535  | 0,01135077 | 0,0148253  | 0,1644441  |
| Q96514 | AT1G13110.1 | 6  | FGFVNLHFGFVPPVVISK,QVSENPVVDVMDLMLK,IQGVDPVVK,TQDLECCSRPETVATR,TLFTLVAS      | cytochrome P450 7187                                             | 1,0196  | 1,6744  | 1,5331  | 0,2339919  | 0,34358374 | 0,30776669 |
| Q9T076 | AT4G27520.1 | 2  | GADSVLEVNK,VDDGSEISLDR                                                       | early nodulin-like protein 2                                     | 0,41046 | 0,47787 | 1,1642  | 0,01347706 | 0,01244755 | 0,236846   |
| Q22203 | AT2G40890.1 | 3  | VQEEFDR,LGASLSIAEHPWLR,DCNLPENR                                              | cytochrome P450 98A3                                             | 0,78558 | 1,0676  | 1,3591  | 0,16645652 | 0,33973072 | 0,12190558 |
| O49650 |             | 4  | IFINVWAIHR,FDQGLVK,EGSPVNLGEQIQLSIFNVFVLR,FGLVK                              | cytochrome P450 like protein                                     | 1,4126  | 1,0654  | 0,75422 | 0,11371281 | 0,34358374 | 0,13180052 |
| Q9S149 | AT2G14100.1 | 1  | IIVHEEK                                                                      | cytochrome P450, family 705, subfamily A, polypeptide 13         | 1,1705  | 1,2152  | 1,0381  | 0,23630779 | 0,16863695 | 0,11453009 |
| Q23391 | AT4G15350.1 | 1  | ILGPOALER                                                                    | cytochrome P450, family 705, subfamily A, polypeptide 2          | 0,73834 | 1,0148  | 1,3745  | 0,13072322 | 0,4568332  | 0,41591242 |
| O49652 | AT4G22710.1 | 1  | EGSPVNLGEQIQLSIFNVVTR                                                        | cytochrome P450, family 706, subfamily A, polypeptide 2          | 0,83679 | 0,97377 | 1,1637  | 0,21818685 | 0,42440272 | 0,23725372 |
| Q9S11  | AT4G12300.1 | 3  | LISEPNVSDFFPWLAR,IPLVALPIPR,LTIVVNSPSLAR                                     | cytochrome P450, family 706, subfamily A, polypeptide 4          | 0,82907 | 1,7559  | 2,1179  | 0,21184587 | 0,02663721 | 0,02060502 |
| Q9S10  | AT4G12310.1 | 2  | LTVVWNSPSLASEILK,TPVALPIPR                                                   | cytochrome P450, family 706, subfamily A, polypeptide 5          | 0,74601 | 0,85455 | 1,1455  | 0,13472408 | 0,20570812 | 0,25418836 |
| Q9LUC9 | AT3G14650.1 | 1  | IFELQAEALQIQITVR                                                             | cytochrome P450, family 72, subfamily A, polypeptide 11          | 0,63641 | 1,3635  | 2,23    | 0,07543942 | 0,49740325 | 0,06968708 |
| Q9ZNT1 | AT5G17770.1 | 8  | FVELPITSVSLGLPIGQHSICR,DGQEGDVIKPYPTTLDSDVGR,FELVIK,EMIQTHCPAPASDIQLR,AFGMI  | cytochrome-b5 reductase                                          | 1,2647  | 1,6615  | 1,232   | 0,18353589 | 0,12620998 | 0,42018922 |
| Q0WLF5 |             | 1  | LFVAIFPSFGR                                                                  | cytosolic O-acetylserine(thiol)lyase                             | 1,562   | 0,85582 | 0,5479  | 0,07358752 | 0,20779961 | 0,0355902  |
| O49485 | AT4G34200.1 | 7  | AHAIGVDLVSFDEALATADIFSLHMLPTPTSK,NVAQADASVK,VLLDGPSPLETTIVQLSNVSK,ALDAGI     | D-3-phosphoglycerate dehydrogenase                               | 1,018   | 1,7115  | 1,5404  | 0,12985308 | 0,11009919 | 0,44382762 |
| Q94130 | AT5G17745.1 | 2  | LAVQLASSGR,EAQEGVAIEAEAVAGALK                                                | D-3-phosphoglycerate dehydrogenase                               | 0,57294 | 1,0078  | 1,759   | 0,04700634 | 0,47673687 | 0,04077339 |
| ASMR4  | AT3G10230.2 | 1  | WYNHALLR                                                                     | elongation factor 1-delta 1                                      | 2,435   | 2,213   | 0,91057 | 0,01347706 | 0,00854441 | 0,31242979 |
| Q93Z27 | AT3G53110.1 | 2  | FTGITAEALVPDSTR,VNLVWVNYLPTK                                                 | DEAD-box ATP-dependent RNA helicase 38                           | 1,0605  | 1,0041  | 0,9468  | 0,37451204 | 0,48770663 | 0,37791345 |
| Q9M2F9 | AT3G58570.1 | 1  | TRLVATDVAAR                                                                  | DEAD-box ATP-dependent RNA helicase 52                           | 0,94954 | 0,70973 | 0,74745 | 0,38583106 | 0,08084458 | 0,12852101 |
| Q56VG6 | AT5G11200.1 | 1  | ILVATDLVR                                                                    | DEAD-box ATP-dependent RNA helicase 56                           | 0,69513 | 1,7252  | 2,4819  | 0,10545331 | 0,02907051 | 0,01197314 |
| Q8LEG8 |             | 4  | YGDYIGR,CSYQSFDFEQVGLASDTPSYELSAVR,NEALWGLMGPVNYVNR,GNLDIFSGK                | dehydration stress-induced protein                               | 1,8203  | 1,1761  | 1,0031  | 0,41634694 | 0,16954179 | 0,230691   |
| P42759 | AT1G20450.1 | 1  | TVEEENQGVMDR                                                                 | dehydrin ERD10                                                   | 0,96415 | 0,6616  | 0,6862  | 0,41535556 | 0,05670342 | 0,08876987 |
| P42763 | AT1G76180.2 | 4  | HVISEPEVVK,HELSLEK,DETKPEETPIASEFEQK,KPEDGSAVAAPVVPVPPVEEAHPVEK              | dehydrin ERD14                                                   | 0,92392 | 0,39418 | 0,42451 | 0,33123166 | 0,00445771 | 0,01390553 |
| Q9S1J  | AT1G54410.1 | 1  | IGDALHIGGGNK                                                                 | dehydrin family protein                                          | 1,6579  | 0,83158 | 0,5016  | 0,05725506 | 0,17733666 | 0,02638708 |
| Q9S9W2 | AT4G05530.1 | 1  | FLEGGASVVSRR                                                                 | dehydrogenase/reductase SDR family member 4                      | 1,4099  | 3,4528  | 2,449   | 0,11399376 | 0,00136455 | 0,01225561 |
| Q9SFH9 | AT1G69740.2 | 1  | HGLVQEVAK                                                                    | delta-aminolevulinic acid dehydratase                            | 1,3356  | 1,0898  | 0,81596 | 0,13687527 | 0,30424444 | 0,1833606  |
| Q9ZS88 | AT4G04860.1 | 1  | LVTNLFYFR                                                                    | derlin-2.2                                                       | 1,0591  | 0,91847 | 0,86724 | 0,37688256 | 0,30531068 | 0,2471388  |
| Q94BV7 | AT4G05020.1 | 3  | VMEVSAIFSK,NLNSQYEQIISPR,VLLGTGWAGTFSFK                                      | NAD(P)H dehydrogenase B2                                         | 2,4173  | 2,968   | 1,2278  | 0,01404151 | 0,00269651 | 0,18165562 |
| A8MQE0 | AT1G80380.3 | 1  | TLTVFALDYFK                                                                  | D-glycerate 3-kinase                                             | 0,2682  | 0,63284 | 2,3595  | 0,00210428 | 0,04546667 | 0,01400428 |
| P50700 | AT4G11650.1 | 1  | TNCNFDSSGR                                                                   | osmotin-like protein OSM34                                       | 2,4094  | 3,9173  | 1,6258  | 0,01413533 | 0,00074766 | 0,05779597 |
| Q39077 |             | 1  | VVSNFVAQALR                                                                  | diamide resistance gene                                          | 1,0905  | 1,266   | 1,1609  | 0,3299506  | 0,13614272 | 0,23990571 |
| Q9FMF7 | AT5G64290.1 | 6  | SLSLSAGSKPNDSRR,LGSYLQSQFCAGNSSALFLTAAQNLLCLK,AASLPAILSLCTPLIYK,DTPEAPGIA    | dicarboxylate transport 2.1                                      | 1,2304  | 1,8351  | 1,2697  | 0,40683029 | 0,17392991 | 0,2413593  |
| Q9LVX3 | AT5G12860.1 | 3  | QTIGWTDWAK,YGLIEWFSQTVVK,AGGIFLPVK,SLCVACGSNVGDGTEHR                         | dicarboxylate transporter 1                                      | 2,1292  | 2,8743  | 1,3093  | 0,07507334 | 0,01662694 | 0,15858849 |
| Q9LUA6 |             | 5  | AAGMALAQHPVNASCK,VGYVNVTDALDALYEK,ITASDVEAAGIAPSK,IVYGDAALFQTKAF,NMIESL      | dihydroliipoamide S-acyltransferase                              | 1,2483  | 0,81106 | 0,65618 | 0,16884263 | 0,175255   | 0,07417003 |
| Q9M5K3 | AT1G48030.2 | 2  | HSFANHGIK                                                                    | dihydroliipoal dehydrogenase 1                                   | 1,3538  | 2,4416  | 1,8035  | 0,13092819 | 0,00626693 | 0,0366822  |
| Q9LZR9 | AT5G03690.2 | 1  | YAVICQENGLVPIEPELVDGSHDK                                                     | fructose-bisphosphate aldolase, class I                          | 2,4066  | 1,6038  | 0,66643 | 0,01413533 | 0,04253299 | 0,07873399 |
| Q9ZRQ1 | AT5G5070.1  | 2  | ISTSADAVSHVAPSEK,DAFLK                                                       | dihydroliipoalysine-residue succinyltransferase component of 2-  | 1,4438  | 1,6076  | 1,2098  | 0,31371371 | 0,04917429 | 0,10386097 |
| Q9SZ31 | AT4G26910.1 | 1  | SEDTASQVTPSQK                                                                | dihydroliipoalysine-residue succinyltransferase component of 2-  | 1,426   | 1,8071  | 1,2673  | 0,10942681 | 0,02365712 | 0,15741367 |
| Q0WRX8 | AT5G23300.1 | 2  | LAVSAAAR,RPDPAILGLEVWGR                                                      | dihydroorotate dehydrogenase                                     | 1,5625  | 3,0791  | 1,9707  | 0,07358752 | 0,00243954 | 0,02760656 |
| Q5XPY9 |             | 2  | LAFNLNDYSQFGTQK,LTSTELSYASTK                                                 | DING protein                                                     | 1,1933  | 1,2296  | 1,0305  | 0,21902323 | 0,15817724 | 0,43180996 |
| Q9LS84 | AT3G15950.1 | 4  | EASQAYEYEAHVHK,QLNLDFSEGGDSAESAR,FTSLLSLELLK,EFEAAHAGFEQK                    | DNA topoisomerase-like protein                                   | 1,0022  | 1,0836  | 1,0772  | 0,42754007 | 0,41077942 | 0,36785181 |
| Q0S212 | AT3G04880.1 | 1  | TSPETALEIFDAWK                                                               | DNA-damage-repair/tolerance protein DRT102                       | 1,0292  | 1,3007  | 1,2638  | 0,42903391 | 0,12138972 | 0,15818238 |
| Q93ZH5 | AT1G21080.2 | 1  | VCEQVLQDPTAK                                                                 | DNAI heat shock N-terminal domain-containing protein             | 1,087   | 1,2762  | 1,1741  | 0,33443041 | 0,1318416  | 0,22896149 |
| Q93Z39 | AT5G19690.1 | 2  | SLSLDPTYASK,AAWEIFNSLDVK,GSGAGLAAAALLMVPYSYR,DGLHVDFDDR                      | dolichyl-diphosphooligosaccharide-protein glycosyltransferase    | 1,3478  | 1,4288  | 1,141   | 0,15606633 | 0,06908048 | 0,27348737 |
| Q9LVR2 |             | 1  | VPDVGVFQFK,VLVLLDLSLK                                                        | dolichyl-di-phosphooligosaccharide-protein glycotransferase (oil | 1,0644  | 1,7482  | 1,6424  | 0,36922949 | 0,02701153 | 0,05550763 |
| Q8LDT6 |             | 9  | YGQYLDGILFAPSTR,GFDFLKF,DILSADTAASDLR,VPDVGVFQFK,VLVLLDLSLK,LSSPQLTSSIS      | dolichyl-di-phosphooligosaccharide-protein glycotransferase (oil | 0,96622 | 1,1847  | 1,1987  | 0,42588881 | 0,09573237 | 0,13380921 |
| Q9S4U2 | AT5G61410.2 | 1  | GVNPNWIEVDGGVTPANAYK                                                         | D-ribulose-5-phosphate-3-epimerase                               | 0,59215 | 0,4356  | 0,73563 | 0,05198142 | 0,00826368 | 0,12188209 |
| Q9M4W0 | AT5G17010.3 | 2  | GLTLEIAK,VSLIGLKK                                                            | D-xylose-proton symporter-like 2                                 | 1,0261  | 2,5281  | 2,2198  | 0,121836   | 0,0711179  | 0          |

|        |             |    |                                                                                         |                                                                  |         |         |         |            |            |            |
|--------|-------------|----|-----------------------------------------------------------------------------------------|------------------------------------------------------------------|---------|---------|---------|------------|------------|------------|
| P42697 | AT5G42080.1 | 8  | GTDAVEILEGR, LGKPIAADAGGK, YNDSLYR, IPGIQSLINK, LDFQIFK, VYVNVQNLPAALK, LIESSIVSR, SIV1 | dynamin-related protein 1A                                       | 1,2678  | 1,2418  | 0.99819 | 0.42619086 | 0.43978357 | 0.38489721 |
| Q8LF21 | AT1G14830.1 | 6  | IPSIVALINK, LDGSIYSYFK, SIDENAEILDR, SLNFFYQAQGR, FPTLASIAAAAANALER                     | dynamin-related protein 1C                                       | 1,2167  | 1,3811  | 1,1022  | 0.31567926 | 0.29123244 | 0.49362608 |
| Q9FNX5 | AT3G60190.1 | 3  | LALLNFFYSQSK, IPSILSLINK, LIEGALGYFR                                                    | dynamin-related protein 1E                                       | 1,5274  | 1,2857  | 0.84269 | 0.1468236  | 0.27906516 | 0.22026775 |
| Q8S944 | AT4G33650.1 | 1  | FIFEEELK                                                                                | dynamin-related protein 3A                                       | 1,1556  | 1,7957  | 1,5551  | 0.29684583 | 0.02802609 | 0.06910349 |
| Q8LFT2 | AT2G14120.1 | 1  | FIFDELVK                                                                                | dynamin-related protein 3B                                       | 1,4402  | 2,9325  | 2,0361  | 0.10523429 | 0.00271908 | 0.0244815  |
| Q9SRU2 | AT3G02260.1 | 1  | VLNFLVLLDLSVAQSPDLR                                                                     | E3 ubiquitin-protein ligase UBR4                                 | 0,73448 | 1,8148  | 2,4709  | 0.12853533 | 0.02343683 | 0.01197314 |
| Q8LCO9 |             | 1  | LASGEVFGDPQPIALK                                                                        | NADP-dependent malate dehydrogenase                              | 0,41902 | 0,27408 | 0.65408 | 0.01466101 | 0.00105177 | 0.07421815 |
| Q9C8G5 | AT1G30360.1 | 15 | GTFLDCLNLSMANITK, AEALAAATNRPNTK, GLEPWEGTSLTR, SLVATENSX, EIYPTFYR, LDMIINLATS         | Early-responsive to dehydration stress protein (ERD4)            | 0,6549  | 0,68714 | 1,0125  | 0.11940032 | 0.02686113 | 0.15775323 |
| Q8LF70 |             | 6  | IPNLIFFDCGATFLK, DQSTLQLTQYVLR, LGYAPPEIELVLSK, ISSVNPYTFLESIYNATSEFVK, GYVSSTYC        | EDGP precursor                                                   | 1,0282  | 1,1931  | 1,0963  | 0.12948732 | 0.21392055 | 0.23176422 |
| Q9LS47 | AT3G18430.2 | 1  | DFVAFLSFAFK                                                                             | EF-hand, calcium binding motif-containing protein                | 0,75617 | 0,73748 | 0.97527 | 0.14224503 | 0.09801687 | 0.44098082 |
| Q9M477 |             | 6  | HLVFFIFEFLOER, WIVNVLIR, LNLNVEAER, SLEEAAPVLSFLNPNVAQLER, YQIGPDQIEALYQAK, YLATA       | eIF3e                                                            | 0,58586 | 1,0652  | 1,8182  | 0.04967535 | 0.34358374 | 0.03610505 |
| Q8VYP0 | AT3G08950.1 | 1  | AAIGPFPSLR                                                                              | electron transport SCO1/SenC-like protein                        | 1,6392  | 4,1141  | 2,5098  | 0.06009101 | 0.00059583 | 0.01166119 |
| Q9M5P3 | AT5G54290.1 | 1  | VSAWNIPISGALLGGGLYFLDR                                                                  | cytochrome c-type biogenesis ccdA-like chloroplastic protein     | 2,3778  | 1,5874  | 0.66761 | 0.01470554 | 0.04460158 | 0.07919991 |
| Q94A18 |             | 1  | IDFVNPDLR                                                                               | putative beta-1,3-glucanase                                      | 2,3775  | 3,4004  | 1,4302  | 0.01470554 | 0.00146374 | 0.09769307 |
| Q9FV72 | AT1G57720.2 | 3  | ALIAAEYAGVK, AAPVAEAPKPEEEAEPKPK, QTEAVPPVPTK                                           | elongation factor EF-1 gamma subunit                             | 2,0131  | 2,3243  | 1,4115  | 0.01553351 | 0.00385866 | 0.25907467 |
| Q04487 | AT1G09640.1 | 5  | EAPVAEAPK, LAEEEAEPKPK, TPAFLK, QTEAVPPIASK, VPVLETPGSEVFESNAIAR                        | elongation factor EF-1 gamma subunit                             | 1,888   | 2,0763  | 1,1781  | 0.06347689 | 0.02159247 | 0.25759092 |
| Q95GT4 |             | 18 | IRPVLTVNK, GVQVLENEK, FGVVLESK, NMSVIAHDHGK, FTADELR, LLEPVYVMEIQAPEGALGGIYSVNLQK       | elongation factor EF-2                                           | 1,006   | 1,2333  | 1,2515  | 0.31381465 | 0.10082244 | 0.18681848 |
| Q95V75 | AT1G62750.1 | 2  | VALTGDHIALAGLK, VVDSLVPLAEFMFQVSTLR                                                     | elongation factor EF-G                                           | 0,75371 | 0,8029  | 1,0639  | 0.17134952 | 0.19576087 | 0.35550787 |
| Q9QWV8 | AT4G02930.1 | 3  | FPQDQIPIIR, VGEVEELIGLR, GSALSLOGTNDIEGR                                                | Elongation factor Tu                                             | 1,3398  | 2,0394  | 1,5546  | 0.11399376 | 0.04359913 | 0.27044118 |
| P37745 | AT4G20360.1 | 13 | EDCVQDAELLELVELEVR, FEAIIYVVK, QTELFFLLAVEDVFSITGR, IVVELIVPACQGMGR, EHILLAK, TITLTA    | Elongation factor Tu                                             | 1,1079  | 0,68169 | 0.63845 | 0.42314706 | 0.04684104 | 0.07543622 |
| Q8VYV1 |             | 1  | AGLLSLAEK                                                                               | AT5G9050/F13G24_250                                              | 2,3485  | 1,6306  | 0.69431 | 0.01553351 | 0.03862535 | 0.09470631 |
| Q8LCP6 | AT1G75680.1 | 3  | LALOFFDIQK, ENPMQNEPTTYNNALLVGLLSLVTSSLOSJK, IDVDTPGTEVAETAAMASASLVFK                   | endoglucanase 10                                                 | 0,84419 | 0,65328 | 0.78739 | 0.22452411 | 0.03690382 | 0.1112510  |
| Q38890 | AT5G49720.1 | 2  | LAGAQLLSLR, FLFSPGYPEELR                                                                | endoglucanase 25                                                 | 1,1239  | 1,3849  | 1,2264  | 0.36417609 | 0.12693655 | 0.20110453 |
| Q9CSN2 | AT5G25100.1 | 2  | EAQMCNVLGR, HEYEGQWSEK                                                                  | endomembrane family protein 70                                   | 0,8976  | 1,0263  | 1,0953  | 0.3931149  | 0.17096144 | 0.24444701 |
| Q9FYQ8 | AT5G35160.2 | 1  | YEEAANVAR                                                                               | endomembrane family protein 70                                   | 0,84352 | 0,9468  | 1,1224  | 0.22317613 | 0.36083543 | 0.28034618 |
| Q8LDH5 |             | 5  | YLEELVK, AVSEASSFGAGYVAGPVTFIEK, VSVFLPEEVK, VVETYEATSAEVK                              | endomembrane-associated protein                                  | 1,6007  | 0,92566 | 0.58216 | 0.07833955 | 0.27470657 | 0.04618817 |
| Q9L1M6 | AT1G22200.1 | 1  | LAFGDFFPGVYNPLDQVQWQNGK                                                                 | Endoplasmic reticulum vesicle transporter protein                | 0,94083 | 0,88932 | 0.94525 | 0.37157152 | 0.25889002 | 0.37589989 |
| Q9V7X5 | AT4G24190.1 | 5  | LADTPCVVTSK, ETYVEWELLNVDK, GLVDSDTPLNVSR, APHDLVSEYNSNKK, DEAGEYLEESK, ELISNASE        | endoplasmin-like protein                                         | 1,1242  | 1,1424  | 1,1843  | 0.33405095 | 0.13826204 | 0.23990571 |
| Q9M2U2 | AT3G5360.1  | 3  | DLAGQDSVYR, DKPVVLSNK, DPGSAGGVQPIR, LETFFVHR                                           | enoyl reductase                                                  | 0,77385 | 0,72492 | 0.93263 | 0.2218635  | 0.1553022  | 0.41363758 |
| Q9ZPI6 | AT4G29010.1 | 5  | FSGGFDNFVQVHK, SPMTELLK, VAVIGGMLGSGIATALLSNIR, ASDLDIASVLGMSFSPYR                      | enoyl-CoA hydratase/3-hydroxyacyl-CoA dehydrogenase              | 1,642   | 1,5284  | 0.93787 | 0.09856805 | 0.02777531 | 0.21238307 |
| Q9ZPI5 | AT3G06860.1 | 9  | FLEAGIR, VAIIGGMLGSGIATALLSNIR, VMDVMEIAVENISLK, GHLIHFVFSQR, LCDLVFGVGAIAA             | enoyl-CoA hydratase/3-hydroxyacyl-CoA dehydrogenase              | 1,2991  | 2,1638  | 1,7794  | 0.13996266 | 0.00938781 | 0.04854766 |
| Q8L860 | AT4G32760.1 | 1  | AQLLALTLEITVK                                                                           | ENTH/VHS/GAT family protein                                      | 1,0825  | 0,95462 | 0.9773  | 0.34220693 | 0.34357193 | 0.46344543 |
| Q9LUG3 | AT3G14210.1 | 14 | IGPMLNEFAK, ISTSPYGFQVTFDFYNAVLR, ANPNADASAQAFVTVNVR, TGNCEYELLNDLAK, GVSVFA            | epithiospecifier modifier 1                                      | 2,1273  | 1,2371  | 0.59507 | 0.02976225 | 0.074121   | 0.1072668  |
| P42762 | AT5G51070.1 | 1  | TAAEGLAISIAEASAPGFLTK                                                                   | ERD1 protein                                                     | 1,3595  | 1,2557  | 0.92365 | 0.12948732 | 0.14192721 | 0.33655818 |
| Q94I1  |             | 2  | FSSLPGEVILASLDGFNK, IVQGENVVAVLSVDEIQWPLTK                                              | ERD7 protein                                                     | 1,2577  | 1,4824  | 1,2184  | 0.36317676 | 0.18669993 | 0.1545229  |
| Q9ASW5 | AT2G18360.1 | 2  | AELLEALVSNK, SSADLLPTSVK                                                                | esterase/lipase domain-containing protein                        | 2,1034  | 1,1142  | 0.5297  | 0.0246647  | 0.27108039 | 0.03184562 |
| Q9ZV19 | AT3G38670.1 | 2  | IVANHEAYQK, IVGSGCVGAFAAGASFLFLFK, TEGVSSDIDVGR                                         | ethanolamine-phosphate cytidyltransferase                        | 3,281   | 0,95543 | 0.89287 | 0.00119159 | 0.05865764 | 6.11E-05   |
| Q3E9K8 | AT5G05740.2 | 3  | LVGPFVPSWQIGSGGATIR, LFLMTPEDDKPVAAVYR                                                  | ethylene-dependent gravitropism-deficient and yellow-green-like1 | 0,72229 | 0,82346 | 1,1241  | 0.13041656 | 0.20536785 | 0.24165941 |
| Q8L9C2 |             | 2  | QPETTAEAPSLTK, TETLVLEGEAK                                                              | ethylene-responsive protein, putative                            | 1,0946  | 1,0719  | 1,2615  | 0.15554632 | 0.29733638 | 0.10264234 |
| Q9S1Z2 | AT2G40290.1 | 3  | VSEEDIQTCER, ILVTDPSVGLPLTR, EVGPDQGEVTK, NAAEAGNEDCPVK                                 | Eukaryotic translation initiation factor 2 subunit 1             | 0,92666 | 1,2371  | 1,3094  | 0.49571374 | 0.0631033  | 0.08325311 |
| Q8RVQ5 | AT5G12370.2 | 1  | AIFTLQDQSVYITEGLER                                                                      | exocyst complex component 5                                      | 2,7292  | 0,80673 | 0.29559 | 0.00763307 | 0.1521335  | 0.00279604 |
| P38666 | AT3G53020.1 | 1  | SIVGATLEVIQK                                                                            | 60S ribosomal protein L24-2                                      | 0,42956 | 0,59232 | 1,3789  | 0.01630164 | 0.03224572 | 0.11454667 |
| Q9ZPY7 | AT2G46520.1 | 1  | YCLDNFAAPLTFELK                                                                         | exportin-2                                                       | 0,68077 | 0,757   | 1,112   | 0.09731746 | 0.11197347 | 0.29277568 |
| Q8L7C3 |             | 1  | DLNVVFGGLIGLWLPSPIPAINGK                                                                | expressed protein                                                | 3,3713  | 1,7651  | 0.52355 | 0.00342053 | 0.02611824 | 0.03075562 |
| Q48702 |             | 3  | SQLGTALTALDLSLQTPVSPQVLDK, AVAQYASDDGFSK, SASEEDAGSDLESSEIK                             | expressed protein                                                | 1,4877  | 2,3533  | 1,6299  | 0.08503666 | 0.01894149 | 0.15812838 |
| Q9MAH9 |             | 8  | LLDEEGOPDEHVR, FLDNFHVQTK, DSIAVNNQDKT, HVISGLIR, TLDEQVDEEFPVR, QWLQIOMGGAPSG          | F12M16.12                                                        | 1,0453  | 1,0617  | 1,0381  | 0.32416414 | 0.43085806 | 0.28089052 |
| Q9LN36 |             | 1  | IPSGEVWGNPAR                                                                            | F18O14.34                                                        | 1,0463  | 1,1122  | 1,063   | 0.3986578  | 0.27332023 | 0.36814976 |
| Q9LNS1 |             | 1  | GFGRV5FR                                                                                | F1L3.2                                                           | 0,59394 | 1,5314  | 2,5784  | 0.0523846  | 0.05301688 | 0.01034931 |
| Q94BX1 |             | 4  | SWGEGSVLR, CGAIEPSYIK, VVTIDSYEDVPTYSEESLK, GVDGTCDQIR                                  | F2G19.31/F2G19.31                                                | 1,1858  | 0,76128 | 0.642   | 0.22317613 | 0.11488251 | 0.06904298 |
| Q95F45 | AT3G09580.1 | 1  | LFDVFR                                                                                  | FAD/NAD(P)-binding oxidoreductase domain-containing protein      | 1,4636  | 1,2886  | 0.88044 | 0.09856805 | 0.12620998 | 0.26397186 |
| Q9KFC4 | AT4G04460.1 | 1  | FDCILGIFK                                                                               | phytepsin                                                        | 0,4244  | 0,46383 | 1,0964  | 0.01746757 | 0.01183842 | 0.34321568 |
| Q9S485 | AT1G30700.1 | 2  | ISSVTFPPYRILPDELIR                                                                      | FAD-binding and BBE domain-containing protein                    | 0,93945 | 1,7742  | 1,8885  | 0.36922949 | 0.02569306 | 0.03184562 |
| Q9FKV0 | AT5G44380.1 | 2  | VTMTYTGGLGFEK, EPIPVGLK                                                                 | FAD-binding and BBE domain-containing protein                    | 0,66738 | 1,2075  | 1,8093  | 0.08839531 | 0.17392991 | 0.03633011 |
| Q38924 | AT2G27190.1 | 5  | FWFIFPK, NQDNGNAVAADSVLLNLR, QAEATVNTYR, EASFHGGLLEIK, TVQYWCENEK                       | Fe(3+)-Zn(2+) purple acid phosphatase 12                         | 2,2812  | 2,0361  | 0.89256 | 0.01779099 | 0.01416146 | 0.28221319 |
| Q9L2X4 | AT3G60900.1 | 1  | TFANLLVSSGVK                                                                            | fascilin-like arabinogalactan protein 10                         | 1,4503  | 1,76031 | 0.31029 | 0.01340805 | 0.1142361  | 0.00376622 |
| Q9FFH6 | AT5G44130.1 | 3  | GGQFVTLIR, FYTLEDLLSVNPNVR                                                              | fascilin-like arabinogalactan protein 13                         | 1,3488  | 0,86816 | 0.72379 | 0.42221674 | 0.28606641 | 0.26059071 |
| Q9S1U3 | AT4G12730.1 | 3  | VAFVQDDDSK, SGNAGVNTLATEGNNK, NILSHLVLYDYGTK, TFQDVTVDGGLVFCPSDVAVK                     | fascilin-like arabinogalactan protein 2                          | 1,3271  | 0,98278 | 0.7797  | 0.49684902 | 0.41256047 | 0.42500305 |
| Q9S1L7 | AT2G20520.2 | 2  | QOQPLAVVYVDSVLPPEELFK, YSLSLDDLLASNPVR                                                  | fascilin-like arabinogalactan protein 6                          | 0,6975  | 0,61647 | 0.87448 | 0.11399376 | 0.0428636  | 0.26466223 |
| Q9S1R1 | AT2G04780.2 | 2  | VSSVSTDPVAVYQVNR, FTDVSGTVR                                                             | fascilin-like arabinogalactan protein 9                          | 0,60293 | 0,7852  | 1,2978  | 0.04661118 | 0.13025477 | 0.1183661  |
| Q9S1R7 | AT3G02230.1 | 1  | GIFWQDIIPFQSAK                                                                          | reversibly glycosylated polypeptide 1                            | 2,2652  | 1,6689  | 0.73675 | 0.01854757 | 0.03426426 | 0.12230716 |
| B3LF88 | AT1G03870.1 | 2  | YYSMDLLSVNPNVR, QQRPLAVYVDMVLLPGEFMGEHK                                                 | fascilin-like arabinogalactan protein 9                          | 0,82205 | 0,68613 | 0.87566 | 0.17831287 | 0.06174874 | 0.12547333 |
| Q7XJ7  | AT5G64440.1 | 13 | LVNVLLEAPLIGSLIVDYK, VVVEIVPELEEMR, IISIIIEFGYKPPFPFLIR, KPAFYDILNTN, TSAIFR, AAHVSI    | fatty acid amide hydrolase                                       | 1,4672  | 1,4897  | 1,0154  | 0.09779852 | 0.06123844 | 0.46175807 |
| Q9LVM3 | AT5G58250.1 | 2  | VLYDSFEATSDALASNPPTLLEFDKPK, YEPGWDDTFLPK                                               | uncharacterized protein                                          | 2,2543  | 1,8875  | 0.8373  | 0.01870364 | 0.01981269 | 0.20945838 |
| Q9ZNV2 | AT5G04140.2 | 4  | ISGLTFDELAR, VTAAPAGLQK, VEPAAIVQR, FPGVPGDLVNFYVAEVR, IPTVYEQAQK, SGSQVLLS             | ferredoxin-dependent glutamate synthase 1                        | 0,66153 | 1,0624  | 1,4523  | 0.04901431 | 0.06404894 | 0.23926079 |
| Q9FKW6 | AT5G66190.1 | 11 | MAEYAEELWELK, GIDIMVLSLAK, LVYTNDDGGEIVK, DGIDWLEYK, LYSIASAIGDFGDSK, MFFEEHEDY         | ferredoxin-NADP+ reductase                                       | 1,2376  | 1,2374  | 1,0407  | 0.2164228  | 0.07394455 | 0.2064367  |
| Q8W493 | AT1G20020.1 | 8  | LYSIASAGDLGNSETVSLCVK, APENFR, ITADDPAGTWHMVFSHQGEIPIR, DPNATVIMLATGTGIAPFR             | ferredoxin-NADP+ reductase                                       | 1,1975  | 1,256   | 1,0663  | 0.23142653 | 0.12329048 | 0.30776669 |
| Q39161 | AT2G15620.1 | 2  | VTELPLVAELIK                                                                            | Ferredoxin-nitrite reductase                                     | 1,4542  | 1,1978  | 0.82364 | 0.10072273 | 0.18127293 | 0.19205589 |
| Q9C4Z9 |             | 2  | LVSETADLQNSK, VQOELAEVGLDR                                                              | ferulate-5-hydroxylase                                           | 1,1411  | 1,443   | 1,2646  | 0.26790162 | 0.07230791 | 0.15800496 |
| Q9LSQ5 | AT5G54500.1 | 4  | SESPITPNLEAEDGFVFPTR, QPTELELQAFHQGQYIASITK, GAASVEGVKAEK                               | flavodoxin-like quinone reductase 1                              | 1,3822  | 1,4108  | 1,0396  | 0.11940032 | 0.10019382 | 0.44115476 |
| P52839 | AT2G03760.1 | 1  | ALVFAALLNR                                                                              | flavonol sulfotransferase-like protein                           | 4,2366  | 10,244  | 2,418   | 0.00119159 | 2.88E-06   | 0.01330089 |
| Q9S7E4 | AT5G14780.1 | 2  | NPNFLGCVENALGIR, IILIMR                                                                 | Formate dehydrogenase                                            | 1,4383  | 1,062   | 0.74803 | 0.18621086 | 0.45242566 | 0.16012956 |
| Q9SPK5 | AT1G50480.1 | 11 | FLYPLDIGIK, SFSDOMIFR, SYGASGVEYSQAEK, IFHETSQSDK, LVPGPFGVTFEAGFGSDIGTEK, STTVTGLC     | Formate-tetrahydrofolate ligase                                  | 1,1095  | 2,378   | 2,1433  | 0.30717238 | 0.00692025 | 0.02006469 |
| P25851 | AT3G54050.2 | 1  | SGVELQTLTGWLLR                                                                          | fructose-1,6-bisphosphatase                                      | 1,1136  | 1,0133  | 0.90989 | 0.30079473 | 0.46084219 | 0.31160325 |
| P29512 | AT5G62700.1 | 1  | YTGDSDLQLER                                                                             | tubulin beta-2/beta-3 chain                                      | 0,43921 | 0,67194 | 1,5186  | 0.01870364 | 0.03089351 | 0.13380921 |
| O      |             |    |                                                                                         |                                                                  |         |         |         |            |            |            |

|          |             |    |                                                                              |                                                                 |         |         |         |            |            |            |
|----------|-------------|----|------------------------------------------------------------------------------|-----------------------------------------------------------------|---------|---------|---------|------------|------------|------------|
| Q9C6B3   | AT1G47260.1 | 5  | GDVNNISVSGTNIQDNLVHAK,NYINLAQIHASENSK,SEFQEJEVER,VLQSGLSGR,H,IEEHLR          | gamma carbonic anhydrase 2                                      | 0,77765 | 0,79717 | 1,0251  | 0,15926174 | 0,14254923 | 0,44115476 |
| Q9A4U7   | AT5G66510.1 | 2  | DTEYDVSDDLTPENVPK,VFFSSSAVESYNSLAQAHATENAK                                   | gamma carbonic anhydrase 3                                      | 0,71617 | 0,69674 | 0,97287 | 0,11793516 | 0,07412095 | 0,43547164 |
| Q9SMN1   | AT3G48680.1 | 1  | SQVTFPSDR                                                                    | gamma carbonic anhydrase-like 2                                 | 1,3225  | 1,3337  | 1,0084  | 0,14224503 | 0,10717064 | 0,47972522 |
| Q9SPF5   | AT4G20410.1 | 2  | AYLSAILLYLAHDLQAEK,LSIWNVADVFR                                               | Gamma-soluble NSF attachment protein                            | 1,398   | 1,6364  | 1,1963  | 0,11399376 | 0,04240089 | 0,26059071 |
| Q8VZB4   |             | 1  | VSGVTEGETAK                                                                  | GDP dissociation inhibitor                                      | 1,6493  | 3,591   | 2,1773  | 0,05897859 | 0,00113564 | 0,0192438  |
| Q8LBY8   |             | 5  | VSGVTEGETAK,VLHITDVTK,AVDGSYVFVQK,VFEDEEGK,SPLMGIFEK,VVCDPSYLTNK,THDGMDLR    | GDP dissociation inhibitor                                      | 1,0878  | 1,4683  | 1,378   | 0,3146579  | 0,15521562 | 0,12117762 |
| O81816   | AT4G38540.1 | 2  | YRPPWELLWSNITK,VLVCGDGVSYVVK                                                 | FAD/NAD(P)-binding oxidoreductase family protein                | 2,2396  | 2,9323  | 1,3093  | 0,01909825 | 0,00271908 | 0,13799311 |
| Q9C7N4   | AT1G29670.1 | 12 | SNYFPGIDFGPPTGR,SYNAQASADAYPMDISR,YSTQLNALNYNGAR,NAQGITCLPQGR,PCRLQISVNGY    | GDSL esterase/lipase                                            | 1,4577  | 1,1983  | 0,81256 | 0,14266898 | 0,47687266 | 0,13699913 |
| Q7X7A4   | AT1G54030.1 | 7  | QASGNVQECVK,NVCAKPEEYFFDGK,LLQLVLVLSR,VDA5PFGYVTGQATGR,FAFQNLAPLGLPAVK,      | GDSL esterase/lipase                                            | 0,96082 | 1,2768  | 1,3317  | 0,39793891 | 0,10864464 | 0,11102598 |
| Q8W4H8   | AT1G54010.1 | 18 | NDISLVSQSGAK,TAPASAPFQTFVDYFNALR,QEFTNMGDQCEY,TLPQTFWYPIK,GASFAVADATL        | GDSL esterase/lipase                                            | 0,89641 | 0,98918 | 1,1231  | 0,2138852  | 0,16604258 | 0,08680409 |
| O9L1P2   | AT3G14220.1 | 7  | LLVAITVLLYR,NAYGCGYSNVHAK,WSGDHVPDFVGR,FAVQNLGLGLCLPIVR,EPIPPVLDPK,INEPSLHG  | GDSL esterase/lipase                                            | 0,85432 | 1,4592  | 1,677   | 0,21322366 | 0,13656973 | 0,07518436 |
| Q1H583   | AT1G54000.1 | 13 | GASFAVAGATLLGAPVESMTLNQQVK,QEYNTMGDQCEY,TLVAQGFWYPIK,IGPMLNEMAR,FSDDLIT      | GDSL esterase/lipase                                            | 0,62792 | 0,87604 | 1,4169  | 0,07846703 | 0,36514363 | 0,05824542 |
| O9F1A1   | AT5G55050.1 | 2  | YGHPTAAAR                                                                    | GDSL esterase/lipase                                            | 0,5278  | 1,129   | 2,1391  | 0,03655796 | 0,25211857 | 0,02008934 |
| O9S2W7   | AT4G30140.1 | 3  | IYLTQLYVLGAR,NVALFGGK,VNLYPIGDIYFQGTGR                                       | GDSL esterase/lipase                                            | 0,43786 | 1,0954  | 2,5194  | 0,03514917 | 0,08577227 | 0,00847069 |
| O65787   | AT2G24180.1 | 4  | FVDSNVEIK,FAADIPFGFWILDR,SFFYDGLGLGFTK,YGPVITVYLSGR,GIVTYDDEALVYMK           | cytochrome P450 71B6                                            | 2,0196  | 3,58    | 1,745   | 0,02011774 | 0,00183813 | 0,08303118 |
| O9CA67   | AT1G74470.1 | 10 | MIDEGLDR,VEAHPIEPRPR,VAVIGGGPAGGAATAELAQGGIETLIER,SIDAGDYDIAIAFQER,FQLATR,   | geranylgeranyl diphosphate reductase                            | 1,8628  | 1,2978  | 0,71195 | 0,01909825 | 0,07348877 | 0,06910349 |
| O9FMA8   | AT5G38940.1 | 3  | APAVAFALSQNPQVTIANTVFGANPAINPILAK,IDIYAVNGQNPPTHTPR                          | germin-like protein subfamily 1 member 11                       | 1,1394  | 0,82984 | 0,75652 | 0,34845914 | 0,14624026 | 0,24216816 |
| P94072   | AT5G20630.1 | 4  | GPQSPSYGSK,GDSMVFPQGLLHFQNSKG,AAVPAFAFAYAGINGLVSLAR                          | germin-like protein subfamily 3 member 3                        | 0,80519 | 0,65081 | 0,87772 | 0,13416284 | 0,04414617 | 0,21796349 |
| P55229   | AT5G19220.1 | 1  | EILNLRL                                                                      | glucose-1-phosphatase adenyllyltransferase large subunit 1      | 1,1038  | 0,85384 | 0,73358 | 0,31342308 | 0,30480329 | 0,14531065 |
| P55228   | AT5G48300.1 | 1  | DVMLDLR                                                                      | glucose-1-phosphatase adenyllyltransferase small subunit        | 0,9766  | 1,3933  | 1,4055  | 0,44740793 | 0,12630998 | 0,13376487 |
| O9M5A9   | AT5G54800.1 | 3  | SEPHHIGDDAAAEATK,TPVQPNVALGAIAAILGTLTYSQAK,TDPDFWK                           | glucose-6-phosphate/phosphate translocator 1                    | 1,5285  | 3,733   | 2,2571  | 0,1468236  | 0,01651631 | 0,07848598 |
| Q8L804   | AT5G46110.1 | 6  | FISDLFWGPMFYHLNQLANTLRL,LLNHGFADAIK,VGFLAK,VAPLTHAVGNVLK,APIDSNLK,ISTQTG     | Glucose-6-phosphate/phosphate translocator-like protein         | 0,77964 | 1,0728  | 1,3244  | 0,18561901 | 0,26738732 | 0,29277568 |
| Q42521   | AT5G17330.1 | 1  | ELELPSR                                                                      | glutamate decarboxylase 1                                       | 0,92183 | 1,0421  | 1,1304  | 0,33667925 | 0,38883617 | 0,27044118 |
| Q38946   | AT5G07440.2 | 4  | TMCHTSCNLR,TAVADIPYGGAK,FIVEAANHTDPDADELSK,GVVVFATEALLAEYK                   | glutamate dehydrogenase 2                                       | 0,67733 | 0,60603 | 0,92321 | 0,17681787 | 0,12530114 | 0,43513114 |
| Q9L830   | AT1G23310.1 | 3  | NVVCNFTGEGAMYSFQIR,ALDVTDLNENVK,QVVALCQAPFLDDPNVGMFLPADAIAR                  | glutamate:glyoxylate aminotransferase                           | 0,62441 | 0,60725 | 0,85227 | 0,08686679 | 0,02346359 | 0,19895015 |
| Q42522   | AT3G48730.1 | 1  | DNGALLFDEVMYFGR                                                              | glutamate-1-semialdehyde 2,1-aminomutase 2                      | 1,4579  | 1,7692  | 1,2135  | 0,09951543 | 0,02592086 | 0,19256419 |
| P42799   | AT5G63570.1 | 1  | SVGGQPLDVSVK                                                                 | glutamate-1-semialdehyde-2,1-aminomutase                        | 2,1919  | 1,4838  | 0,67694 | 0,02094976 | 0,06237995 | 0,08325311 |
| B9DGD1   | AT5G35630.1 | 17 | HETASIDQFSWGVANR,VSGEVPPWGEIQEYTLTQQNVK,WPLGWVPGAFPGQPGYCGVGADK,GGNN         | glutamine synthetase                                            | 0,71733 | 0,51192 | 0,71924 | 0,24130467 | 0,05301425 | 0,13576487 |
| Q9SUR3   | AT4G23630.1 | 1  | AMIEK                                                                        | reticulon-like protein B1                                       | 0,45225 | 0,40301 | 0,89111 | 0,02012287 | 0,00593853 | 0,28053259 |
| Q9WVW2   |             | 2  | HAAAEIFANPDVIAEVPVYGEQYTLQK                                                  | glutamine synthetase like protein                               | 1,15    | 2,1374  | 1,8586  | 0,25753301 | 0,01162354 | 0,03345105 |
| P48641   | AT3G24170.3 | 1  | VISSHEEFDVAVLAFGR                                                            | glutathione reductase, cytosolic                                | 0,80612 | 0,91953 | 1,1407  | 0,18621086 | 0,30624202 | 0,25907467 |
| Q9L153   | AT3G23820.1 | 1  | NPQSYIASNIAGVNLLEVAK                                                         | UDP-D-glucuronate 4-epimerase 6                                 | 0,45798 | 0,644   | 1,4062  | 0,02122885 | 0,04945274 | 0,10547518 |
| Q948Y2   | AT1G65820.1 | 3  | YNYVPTLYIAESENK,LFNCVQR,AAITEFLK                                             | glutathione S-transferase                                       | 1,2126  | 1,4734  | 1,2311  | 0,23630779 | 0,24156639 | 0,43368879 |
| Q9L7B7   |             | 1  | TDWDSVIVSEAK                                                                 | LI3 protein                                                     | 2,1824  | 1,88    | 0,86141 | 0,02122885 | 0,02016917 | 0,23990571 |
| Q9FWR4   | AT1G19570.1 | 3  | TPAEFASVNGIFGTGFLK,VVTDSDVIVGILEEK,VSADVLSLAK                                | glutathione S-transferase DHAR1                                 | 1,4996  | 1,3318  | 0,96805 | 0,17134952 | 0,05252261 | 0,19116842 |
| P42761   | AT2G30870.1 | 5  | HVSAAWWDK,IPVLVDGQYK,VLTIYAFASSK,NEYLADGFSVSLADLAHLPTFEYLVGPIK,LAELVDVYEAQL  | glutathione S-transferase ERD13                                 | 1,3414  | 1,4387  | 1,0387  | 0,05241001 | 0,02515116 | 0,37267206 |
| Q9FHX0   | AT5G42150.1 | 1  | AALYDAEYVVDVAK                                                               | Glutathione S-transferase family protein                        | 1,5464  | 2,8547  | 1,846   | 0,07677157 | 0,00303049 | 0,03423451 |
| P46422   | AT4G02520.1 | 3  | LAFEQIKF,ETNQNLMLTQDTS,SIYGLTDEAVVAAEEAK                                     | glutathione S-transferase PM24                                  | 2,6651  | 1,183   | 0,427   | 0,00603378 | 0,15817724 | 0,01197314 |
| Q9M9F4   | AT1G78370.1 | 3  |                                                                              | glutathione S-transferase TAU 20                                | 1,3829  | 1,5704  | 1,1356  | 0,11940032 | 0,04684104 | 0,26397186 |
| Q9LPW0   | AT1G12900.1 | 2  | YDSTLGFADVPKSGDSALVDGK,VLITAPGK                                              | glyceraldehyde-3-phosphate dehydrogenase (NADP+)- (phospho      | 0,85003 | 0,8691  | 1,0194  | 0,2378156  | 0,32795148 | 0,16416895 |
| P25856   | AT1G26570.1 | 6  | DSPLDIANDTGGVK,NPSLPLWK,ILQVYSNR,VITAPGK,YDSTLGFADVPKPSGETAISVDGK            | glyceraldehyde-3-phosphate dehydrogenase A                      | 0,67593 | 0,52109 | 0,69647 | 0,15240911 | 0,04253299 | 0,1763451  |
| P25857   | AT3G69010.1 | 11 | AVSLVLPQLK,VITAPAK,NYDMLGTFK,IGDVCADPLVSDVDFR,DSPLVVLNDSGGVK,VVDLAHLVASK,I   | glyceraldehyde-3-phosphate dehydrogenase B                      | 0,65349 | 0,52935 | 0,72352 | 0,1258008  | 0,02686113 | 0,15236678 |
| P25858   | AT3G04120.1 | 10 | AASNPIISSTGAAK,FGVIEGLMTVTHSATQTK,YDSVHGQWK,IGINGFR,DAPMFFVGVNHEHYK,TLFEC    | glyceraldehyde-3-phosphate dehydrogenase, cytosolic             | 1,4285  | 0,90749 | 0,5735  | 0,10942681 | 0,1080633  | 0,03164068 |
| Q9LMM0   | AT1G01610.1 | 1  | TALDPIHAIAGR,VIGVGLGFCTELTR                                                  | glycerol-3-phosphate acyltransferase                            | 0,68428 | 0,57311 | 0,80433 | 0,11399376 | 0,02592086 | 0,16365698 |
| Q8CGW0   | AT5G60620.1 | 3  | IFVDAPWNSR,DLDISPTLEAAGAVDDSFTR                                              | glycerol-3-phosphate acyltransferase 9                          | 1,3927  | 1,9083  | 1,3703  | 0,11867247 | 0,01888222 | 0,11731952 |
| O9S548   | AT3G10370.1 | 6  | LHGGVVR,SMADAVDAIAK,LDGPTASVPSR,VVEISELSEK,VVFMPLWLR,LNVGLACTAALAGAAVLNH     | glycerol-3-phosphate dehydrogenase SDP6                         | 1,0493  | 1,4952  | 1,4249  | 0,3931149  | 0,05998603 | 0,09913303 |
| Q9M1J1   | AT3G57090.1 | 2  | GIAMLESLESSAPPLEDR,LYLLAVGYRR                                                | protein BIGYIN1                                                 | 2,1494  | 2,4187  | 1,1253  | 0,02311352 | 0,00639157 | 0,27728696 |
| O9SLV3   | AT1G58270.1 | 8  | FLSFADIK,YQISQETEQR,TRPPNSYCVK,NWALK,DVYAEITFLAYK,VIDQIQSNFEK,DPFEWR,FLDYSYS | TRAF-like protein                                               | 0,53874 | 0,42752 | 0,80081 | 0,02311352 | 0,00354507 | 0,15554888 |
| Q3E8X0   | AT2G21660.2 | 1  | GFGRVTFK                                                                     | glycine-rich RNA-binding protein 7                              | 1,2684  | 2,3498  | 1,8526  | 0,16916149 | 0,00738458 | 0,03363603 |
| Q22797   | AT2G3470.2  | 1  | AMDFLFR                                                                      | glycolipid transfer protein 1                                   | 0,78776 | 1,2912  | 1,6391  | 0,16885097 | 0,12530114 | 0,0555293  |
| O8VX0    | AT1G54860.1 | 1  | LTYNQDISECK                                                                  | Glycoprotein membrane precursor GPI-anchored                    | 0,34698 | 0,87906 | 2,5335  | 0,00649404 | 0,24236245 | 0,01108888 |
| Q8W112   | AT5G20950.2 | 10 | GFVSDWQIGDR,IGQMVQIER,NTVAPPTQVYVSNQPDANFVK,ELVTGFK,FTMGLFEEPLADLSFANQLG     | Glycosyl hydrolase family protein                               | 0,6219  | 0,92197 | 1,5215  | 0,09951543 | 0,22648565 | 0,15741367 |
| Q8C7F7   | AT1G27950.1 | 1  | VTLCDFATGK                                                                   | glycosylphosphatidylinositol-anchored lipid protein transfer 1  | 0,46123 | 0,74006 | 1,6045  | 0,02208201 | 0,099675   | 0,06026299 |
| Q9L7R9   | AT5G57020.1 | 1  | SALKPAELGLVLLD,IGDTSLPEGPIEPTATPLSEVK                                        | glycyl-peptide N-tetradecanoyltransferase 1                     | 0,8491  | 1,1607  | 1,3914  | 0,18917409 | 0,17874159 | 0,08303118 |
| Q9WVW1   |             | 2  | LEFLMFR,LFYPSFK                                                              | glycyl-tRNA synthetase                                          | 0,91153 | 1,1132  | 1,2212  | 0,32084694 | 0,27199465 | 0,18698463 |
| Q23627   | AT1G29880.1 | 2  | AGDEQLNLR,LFYPSFK                                                            | glycyl-tRNA synthetase 1                                        | 1,1839  | 1,418   | 1,1978  | 0,22469517 | 0,07812003 | 0,20655705 |
| Q84L08   | AT5G19980.1 | 1  | SLTPLVAIADTVFR                                                               | golgi nucleotide sugar transporter 4                            | 1,6212  | 4,6559  | 2,5732  | 0,13337707 | 0,00243954 | 0,01568383 |
| Q9FMH8   | AT5G43060.1 | 3  | WGSEGYIK,VTVDISEYEDPENSEASK,NGGIDTEADYPYK                                    | Granulin repeat cysteine protease family protein                | 0,95676 | 1,2166  | 1,2716  | 0,40082814 | 0,16763753 | 0,15599286 |
| Q9L778   | AT3G19390.1 | 2  | VVTIDGYEDVPQNDK,ALANQPISVIAEAGGR                                             | Granulin repeat cysteine protease family protein                | 0,87942 | 0,96799 | 1,1007  | 0,27231812 | 0,40965488 | 0,30883009 |
| Q9LXK6   | AT3G15090.1 | 3  | FGGPEVFLR,VGQEVFGALHPTALR,IGINFRL,YGFVVGLPLATLSLLMK                          | GroE-like zinc-binding alcohol dehydrogenase family protein     | 0,78626 | 1,3722  | 1,7731  | 0,13996266 | 0,10013982 | 0,03772105 |
| Q9LX24   | AT3G56460.1 | 4  | ELLSWLSR,LGDPPTATNPGSPVPEVSK,YQEKPPPIFGSDYSGVDAIGPAVTK,VIATSLNYANLQILQK      | GroE-like zinc-binding alcohol dehydrogenase-like protein       | 1,2411  | 1,5367  | 1,2382  | 0,18615349 | 0,05241017 | 0,17419534 |
| Q9ZR12   | AT4G03190.1 | 1  | LNPAVTLDGLVSLR                                                               | GRR1-like protein 1                                             | 0,71555 | 1,1208  | 1,5663  | 0,11756599 | 0,26260914 | 0,0680051  |
| Q8H156   | AT5G51590.1 | 4  | LNVGDGGTK,VCEINPVLGCKN,SNYFKEPKELYLR,NLQYYEISAK                              | GTP-binding nuclear protein Ran-3                               | 1,1582  | 1,1225  | 0,98126 | 0,30314377 | 0,13614272 | 0,26061733 |
| Q9SA73   | AT1G30580.1 | 3  | TGFSAINLYFFTAGPDEVK,TVYVQDGDIFFK                                             | GTP-binding protein                                             | 1,3184  | 2,1388  | 1,6223  | 0,14408762 | 0,01161912 | 0,05824542 |
| Q42067   |             | 1  | ILFLGIDNAGK                                                                  | GTP-binding protein (Fragment)                                  | 1,0678  | 1,1138  | 1,0431  | 0,36417609 | 0,27146028 | 0,40522387 |
| Q9FM55   | AT5G08650.1 | 1  | EGIGTEILDAVQR                                                                | GTP-binding protein LepA                                        | 0,6245  | 0,95416 | 1,5279  | 0,06470951 | 0,37805955 | 0,07434431 |
| O24456   | AT1G18080.1 | 13 | LWDLAAGVSTR,DGVVLLWDLAEG,AYGVAQR,AHTMDVTAIATPDINDIIVSASR,SLAGHTGYVSTVA       | guanine nucleotide-binding protein subunit beta-like protein    | 1,1627  | 1,3417  | 1,1867  | 0,45852089 | 0,04414617 | 0,05864327 |
| Q9LXK4   |             | 3  | GEIGFFPIVLR,NPASVAQFLR,YAFLTSLVR                                             | guanine nucleotide-exchange-like protein                        | 0,87662 | 1,1571  | 1,3236  | 0,11810843 | 0,38397552 | 0,12852101 |
| P20649   | AT2G18960.1 | 8  | AWASLFDNR,EDVNIPEFK,ESPGGPWEVGLLPLDFDPPR,TALTYDSDGNWHR,GAPEQLDLNANPDLR       | H(+)-ATPase 1                                                   | 1,2499  | 1,6783  | 1,4673  | 0,43781083 | 0,43293578 | 0,49431307 |
| Q53XH7   | AT5G62670.1 | 2  | ETVDLENVPIEVEFESLR,SLAVAYQEVPGTK                                             | H(+)-ATPase 11                                                  | 1,2527  | 0,69216 | 0,55255 | 0,17831287 | 0,07196559 | 0,03633101 |
| Q9FNC4   | AT5G44020.1 | 3  | FEWQNSGK,TWLTSLGYR,SATVENLIEAGYHSWSNLLR                                      | HAD superfamily, subfamily IIB acid phosphatase                 | 1,1071  | 0,82673 | 0,75372 | 0,29409355 | 0,2028412  | 0,13614308 |
| Q8V210   | AT1G56500.1 | 8  | QLNSPWPVDCFPVNEK,ILGVPTSECV,VIDDALAGVAAQAANMR,ALDQTTGGR,SPSFTQNGEGR,QT       | haloacid dehalogenase-like hydrolyase domain-containing protein | 0,91443 | 0,91832 | 1,0043  | 0,32505317 | 0,30531068 | 0,48838174 |
| Q3E700   |             | 1  |                                                                              | HD2B (HISTONE DEACETYLASE 2B)                                   | 1,3437  | 1,4035  | 1,0445  | 0,13416284 | 0,08232493 | 0,40289158 |
| P22953   | AT5G02500.1 | 7  | STVHDVVLVGGSTR,EFAAEISEMVLK,SINPDEAVYGAAVQAGLSGEGNEK,IQAGPAKPMIYVEYK,FS      | heat shock 70kDa protein 1/8                                    | 1,0502  | 1,078   | 0,0363  | 0,33397761 | 0,13019327 | 0,22571128 |
| Q9M637   | AT5G49910.1 | 1  | VVDWLASTFK                                                                   | heat shock protein 70-2                                         | 1,3364  | 0,99565 | 0,745   | 0,13677514 | 0,48702348 | 0,12730146 |
| Q93VK7   | AT5G14910.1 | 1  | ALQDIDGVSNLK                                                                 | heavy metal transport/detoxification domain-containing protein  | 1,4136  | 1,2328  | 0,87215 | 0,11363801 | 0,15651457 | 0,25335726 |
| Q9FF10   | AT5G07830.1 | 1  | QTLVGGYVGLLEK                                                                | Heparanase-like protein 1                                       | 0,64843 | 1,3202  | 2,036   | 0,0772805  | 0,11216109 | 0,02444815 |
| Q42525   | AT4G29130.1 | 6  | GF5IEAVGQDVGVALNK,IAALVNDVTGLTAGGR,MAEDAFAFGDTPVSK,AFEECDATPIK,GLFYALDGG     | hexokinase 1                                                    | 0,98848 | 1,2981  | 1,2592  | 0,40965549 | 0,10589214 | 0,15004595 |
| P93834   | AT2G19860.1 | 2  | SHELFDFVIVLAK,AFEECDATPIK,MAEEAFAFGDVPK                                      | hexokinase 2                                                    | 0,8327  | 1,1576  | 1,4028  | 0,20871781 | 0,21890917 | 0,10726688 |
| O64644</ |             |    |                                                                              |                                                                 |         |         |         |            |            |            |



|        |             |                                                                                     |                                                                  |         |         |         |            |            |            |
|--------|-------------|-------------------------------------------------------------------------------------|------------------------------------------------------------------|---------|---------|---------|------------|------------|------------|
| Q95I0  | AT2G38810.3 | 1 AGIQFPVGR                                                                         | histone H2A 8                                                    | 1,0172  | 1,0919  | 1,1231  | 0,09182467 | 0,08944023 | 0,34755475 |
| Q9FC0  | AT5G22880.1 | 1 TPAEAPAAAEK                                                                       | histone H2B                                                      | 0,60159 | 1,133   | 1,8991  | 0,03379681 | 0,07609794 | 0,11842417 |
| Q9R40  | AT3G09220.1 | 4 GVHYHGASK,NTLAVPVGVGWAIVIR,LPSSFDTLTYR,GIFTADFPDQPPVK                             | laccase 7                                                        | 2,1287  | 1,6824  | 0,79035 | 0,02379383 | 0,0325878  | 0,15788845 |
| Q48917 | AT4G33030.1 | 1 FCVQAAGVHPLTVYVK                                                                  | UDP-sulfoquinovose synthase                                      | 2,1263  | 2,4452  | 1,15    | 0,02379383 | 0,00626693 | 0,25049011 |
| P59259 | AT5G59970.1 | 6 I5GLVEETR,DAVITYEHAR,JFLENVIR,VTVAMDVVYAK,DNIIQGITPKAIR                           | histone H4                                                       | 0,89978 | 1,1206  | 1,2159  | 0,2218635  | 0,22651716 | 0,42700519 |
| Q9LM25 | AT1G18260.1 | 1 LPVTLALASLWLR                                                                     | Hr.3 like protein                                                | 0,79429 | 1,4188  | 1,7863  | 0,17500456 | 0,0779512  | 0,0380425  |
| Q8L7U4 | AT4G02450.1 | 1 IFLTIVLADTK                                                                       | HSP20-like chaperone                                             | 0,88513 | 0,8649  | 0,97714 | 0,28236567 | 0,22043189 | 0,44412223 |
| Q9C9W5 | AT1G68010.1 | 8 GPVIDEALVLEHLK,YGIAVGNTPVLTETTLAAEALSAAAR,GGLYEGWPHLFGVNLK,GQTVGVIGAGR            | hydroxypruvate reductase                                         | 0,71761 | 0,71009 | 0,99437 | 0,05045175 | 0,05546255 | 0,28320703 |
| Q9FM19 | AT5G62740.1 | 2 DSVLGFVNVVPGTAK,LLDDVFEK                                                          | Hypersensitive-induced response protein 1                        | 1,4672  | 1,8397  | 1,261   | 0,06099168 | 0,01461739 | 0,17416837 |
| Q9CAR7 | AT1G69840.7 | 3 AMNENIAASR,NSVLAFSSEVPTGSSK,LLDDSTFEQK                                            | Hypersensitive-induced response protein 2                        | 1,0557  | 1,2091  | 1,1454  | 0,38252051 | 0,1728863  | 0,25419492 |
| Q8VZG1 | AT2G18730.1 | 1 YGLGLEK                                                                           | diacylglycerol kinase 3                                          | 2,1248  | 1,8355  | 0,86386 | 0,02379383 | 0,02212846 | 0,24216816 |
| Q9FHM7 | AT5G51570.1 | 1 ASADDAFYELQNP,K,EQIQAVYFVDVR                                                      | Hypersensitive-induced response protein 4                        | 1,3843  | 1,6317  | 1,1947  | 0,14877313 | 0,02686113 | 0,12761338 |
| P15459 | AT4G27160.1 | 1 QEPEVCVCPYLK                                                                      | seed storage albumin 3                                           | 0,47098 | 0,56721 | 1,2043  | 0,02379383 | 0,02619155 | 0,20110453 |
| Q0WPB8 |             | 1 LEDSDLLSSLLAEDLTFHTPAFTEK                                                         | hypothetical protein                                             | 1,5932  | 3,4492  | 2,165   | 0,06642235 | 0,00136455 | 0,01957823 |
| Q712H0 |             | 1 FTSLTSLSELK                                                                       | hypothetical protein                                             | 1,2426  | 1,318   | 1,0606  | 0,18555418 | 0,11310742 | 0,37115731 |
| Q9FW47 |             | 2 GIESLDLSYNGFHLNTPK,LSGTIPNLSFK,LSGTLPANIGALSQLEAFSELEGR                           | hypothetical protein                                             | 1,225   | 1,2288  | 1,0283  | 0,36304362 | 0,19026959 | 0,29405411 |
| Q9C9C7 |             | 1 IIGLVGDDVPAGTAR                                                                   | hypothetical protein                                             | 1,2031  | 0,90332 | 0,7508  | 0,21322366 | 0,27999526 | 0,12993117 |
| Q0WLE7 |             | 9 YATVIR,VDAFYVFEK,VTGEAHTAMTEYDR,FQITSEK,FIDTASIFGHGR,HGSLGLRPL,VLAAHTQIR,AGMTF    | hypothetical protein                                             | 1,1772  | 1,4341  | 1,3935  | 0,17831287 | 0,06951783 | 0,03590064 |
| Q95VPS |             | 1 NSQLGNSPIPTNSIAALLQVLK                                                            | hypothetical protein                                             | 0,92085 | 0,66474 | 0,72187 | 0,3350995  | 0,05810662 | 0,11243923 |
| Q0WLG5 |             | 1 LFLPALLSLEFGSAAPALTALK                                                            | hypothetical protein                                             | 0,76992 | 1,359   | 1,7651  | 0,15214608 | 0,09703449 | 0,04032378 |
| Q0W5T9 |             | 1 NSQTGSGIFAPPEISGR                                                                 | hypothetical protein                                             | 0,70198 | 0,7843  | 1,1173  | 0,10942681 | 0,13220957 | 0,28646833 |
| Q9M2L9 |             | 1 ESTEPVEEDVATQPIR                                                                  | hypothetical protein                                             | 0,59391 | 0,8389  | 1,4125  | 0,0523846  | 0,18610806 | 0,10311528 |
| Q0WQ33 |             | 2 NAASAIASDEK,LLAHSFK                                                               | hypothetical protein                                             | 0,52418 | 0,76893 | 1,4669  | 0,03554246 | 0,21138972 | 0,0862945  |
| Q9S152 |             | 1 IELQLALTLLK                                                                       | hypothetical protein                                             | 0,45257 | 1,2869  | 2,8435  | 0,02012287 | 0,12693655 | 0,00652833 |
| P56785 |             | 6 SFLWPNFK,FLFDIVR,YYLPLIIK,NTLYFISTIK,ILNFWFTK,TVIWEFFQAK                          | hypothetical protein Arthcp087                                   | 0,88332 | 1,8575  | 2,1176  | 0,37844445 | 0,02119669 | 0,0227367  |
| Q8VYM2 | AT5G43350.1 | 3 FPAPTYAVNR,VDAQYPPGIVK,STCHGISAAAGK                                               | inorganic phosphate transporter 1                                | 3,1162  | 1,2511  | 0,6392  | 0,03269544 | 0,21561358 | 0,04767472 |
| Q96536 |             | 1 VSNQIGLDAVAAAEFLNK                                                                | pyruvate decarboxylase                                           | 2,1072  | 2,9535  | 1,4016  | 0,0246647  | 0,00271908 | 0,10708804 |
| Q38954 | AT3G26570.2 | 5 ITELTPTR,GFAAEFAASVVLFA5K,IFPALSQALACGVAGAIVDR                                    | inorganic phosphate transporter 2-1                              | 0,79185 | 1,1344  | 1,0819  | 0,12948732 | 0,09507086 | 0,48836072 |
| Q9ASX8 | AT1G27760.1 | 1 IAAGEALAVYELGTEK                                                                  | Interferon-related developmental regulator domain-containing 1   | 1,0868  | 2,1895  | 2,0146  | 0,33459764 | 0,01050728 | 0,02532886 |
| Q9SR26 | AT1G65930.1 | 6 LITPVEFDIK,AFADASMTAYE,K,DYLTNEEDFAVAEAK,LLDDMVAYAK,LEAACVGTVESGK                 | isocitrate dehydrogenase                                         | 1,453   | 1,0451  | 0,73762 | 0,13687527 | 0,2634429  | 0,21160685 |
| Q945K7 | AT5G03290.1 | 1 TDGLFK                                                                            | isocitrate dehydrogenase [NAD] catalytic subunit 5               | 0,7445  | 1,0642  | 1,4294  | 0,13416284 | 0,34544696 | 0,09794451 |
| Q9LQ31 | AT1G33790.1 | 4 IYVQGGQEQIQYK,TSPFGLLETSNFKVGL,AAAADGAIGYFSR,IFGSGGGVITMLK                        | jacalin lectin family protein                                    | 0,57381 | 1,5773  | 2,7489  | 0,04730835 | 0,04567457 | 0,00775371 |
| Q04310 | AT3G16460.2 | 31 IGHFGAGFNHNSVIGAVFVK,SSTPVPSTPLK,SLSTQEVITALTFTTNK,SAEFTLAPDEYIATSAYK,TSYGI      | jacalin-like lectin domain-containing protein                    | 0,87881 | 0,8484  | 1,1212  | 0,42165346 | 0,2622811  | 0,33321787 |
| Q04311 | AT3G16450.3 | 1 QTSAPFGLGAGTAFELK,VYVQGGQDGS5AVK,ASELLQGFQHVVMPLTN,TSPPYLEQTK,VEAGGGAGGA          | jacalin-like lectin domain-containing protein                    | 0,75136 | 0,5958  | 0,79327 | 0,13264411 | 0,09018468 | 0,44608355 |
| Q08050 | AT2G39310.3 | 20 SVETAYTKPNFISNTAISLK,FEYQDEQEVVTEYGTNNQHPK,IVGFHGQASDVVHSGIVPTVITTE,VVD          | jacalin-related lectin 22                                        | 0,50624 | 0,73386 | 1,471   | 0,01691131 | 0,05562979 | 0,07493888 |
| Q04313 | AT3G16430.2 | 4 QTSPPFGLGAGTAFELK,IGVHVRPVS,NGGNQWDDGSDHDVATK,NGQTEQTLPR                          | jacalin-related lectin 31                                        | 0,62107 | 0,81641 | 1,3145  | 0,06347689 | 0,16177995 | 0,13614308 |
| Q9ZT77 | AT1G01790.1 | 3 GGIGFQIAEALGLAAK,VGQIIAQLLSER,AAVAITIAIAGR                                        | K(+)-efflux antiporter 1                                         | 0,64198 | 0,97129 | 1,4596  | 0,11940032 | 0,30606248 | 0,07814145 |
| 065272 | AT4G00630.1 | 5 SLDLVPYFGDAGSR,IGQIIAQLLSER,ACAAAIADTPGANYSR,GGIGFQIAEALGLAAK                     | K(+)-efflux antiporter 2                                         | 1,4805  | 3,2531  | 2,0477  | 0,37462917 | 0,0369508  | 0,06999134 |
| Q05758 | AT3G58610.3 | 3 APVSLDFEYSVFK,NSIVAVCPK,NTVECTGTISR,VSLAGYEEYVR,GILLGAVHGVESLFR                   | ketol-acid reductoisomerase                                      | 0,9682  | 0,87458 | 0,8834  | 0,19991482 | 0,077212   | 0,23682267 |
| Q8VYCS | AT1G18270.1 | 1 GSTCIVNAESER                                                                      | ketose-bisphosphate aldolase class-II-like protein               | 0,71168 | 0,72604 | 1,0202  | 0,11533731 | 0,09077271 | 0,45058148 |
| Q9LMU2 | AT1G17860.1 | 2 LALSDVPLK,SLTTGVNYYLPIVR                                                          | kunitz type trypsin and protease inhibitor domain-containing prc | 1,1264  | 1,1955  | 1,0613  | 0,28627108 | 0,18336696 | 0,37046625 |
| Q683G1 |             | 1 LGDYSYTLQK                                                                        | similar to senescence-associated protein                         | 2,1047  | 2,102   | 0,99869 | 0,0246647  | 0,012231   | 0,49515082 |
| Q6NQI8 | AT1G13580.3 | 1 VLPLFAVFFPSIR                                                                     | LAG1 longevity assurance homolog 3                               | 0,74228 | 1,6436  | 2,2143  | 0,13337707 | 0,03699437 | 0,01836847 |
| Q42593 | AT1G7490.1  | 2 TPGPEGAGQGSWTVK,FDPPPEGIVNVPEK                                                    | L-ascorbate peroxidase                                           | 1,2916  | 0,90789 | 0,70294 | 0,15594361 | 0,28678651 | 0,09959582 |
| Q42564 | AT4G35000.1 | 5 SGDFGWPQTEPLK,LAWHADAGTYDAQSK,IALDLCEGV,GESEGLK,LSLEGNPNSSAGK,TLLEDEPR            | L-ascorbate peroxidase                                           | 1,2874  | 1,7579  | 1,3889  | 0,12759718 | 0,02168291 | 0,12443244 |
| Q05431 | AT1G07890.8 | 6 LAWHASAGTFDCQSR,NCAPIMVR,AAEEDAFFADYAEAHMK,EGLLQLVSDK,EDKQPPPEGR,FDAEQAF          | L-ascorbate peroxidase                                           | 1,13    | 1,0836  | 1,0023  | 0,28995258 | 0,35214127 | 0,37333458 |
| Q9M386 | AT3G54200.1 | 5 RPTTITSDVTVDR,IGFSYDSSALLNYSR,LQASVNPMLK,GGVIGEAPLPAWR,LLSETQLLSDVMAGVPLNTF       | late embryogenesis abundant hydroxyproline-rich glycoprotein     | 0,77524 | 0,71073 | 1,0164  | 0,27014962 | 0,03232666 | 0,08303118 |
| Q80576 | AT2G4060.2  | 4 FSLEETVAIHLVR,IPLTLVDYDK,DFGSALWDMIR,KPVDVIEK                                     | Late embryogenesis abundant protein, group 2                     | 0,95465 | 0,77031 | 0,86297 | 0,37011401 | 0,17732078 | 0,15245963 |
| Q9FZ78 | AT1G27480.1 | 2 YGGDGTVNLASLAAK,TFASGNTLGVPLVNPVLLVR                                              | Lectin-cholesterol acyltransferase-like 1                        | 0,78246 | 1,0734  | 1,3719  | 0,16337716 | 0,3285467  | 0,11688919 |
| Q39205 | Q9L722      | 6 AGYAWQTLVGR,KAWIEFR,SENKILHIEFDTK,BETPFSHGQGLYINPIQFK,RPLQGS,TSFTSITPR            | lectin-like protein                                              | 1,8193  | 1,2161  | 0,68576 | 0,10942681 | 0,30531068 | 0,13880363 |
| Q9L722 | AT3G16530.1 | 4 EFLDLSGNHGVNWSMSTLSVAEK,VLNVEVLQNMVAGFAGSVMGR,TNDGKPNHILAEFDTFQNK,DSTITV          | legume lectin-like protein                                       | 1,7526  | 2,2208  | 1,3461  | 0,09843317 | 0,00595997 | 0,04801067 |
| P30184 | AT2G4200.2  | 3 LSSVSLASGVNLFEDGR,SGTGFVATLVEVWQK                                                 | leucine aminopeptidase 1                                         | 2,3382  | 1,8632  | 0,85948 | 0,06099168 | 0,03712161 | 0,44115146 |
| Q944P7 | AT4G30920.1 | 1 AATGFVATLVEVWQNSKH                                                                | leucine aminopeptidase 3                                         | 1,0235  | 1,2104  | 1,1826  | 0,44321714 | 0,17190195 | 0,22000405 |
| Q8C299 | AT5G49760.1 | 6 CTNDFEANDVGGGGYK,LLGFCFDR,SLYDQLLELDTIASSGNLK,LPADISFLSEL,AIADFK,ENPTDHC          | leucine-rich repeat protein kinase-like protein                  | 1,3354  | 1,2373  | 0,91402 | 0,23630779 | 0,44146823 | 0,25204488 |
| Q9L519 | AT3G28450.1 | 3 IAETFDENIR,GDYGVLVLELLEATGLK,IPVFFSSPSSYSDPSGNK,FSVANNLDSGR                       | leucine-rich repeat protein kinase-like protein                  | 1,1168  | 1,0004  | 0,89661 | 0,38247193 | 0,36514363 | 0,29237547 |
| Q9LH71 | AT3G14840.2 | 3 LVQAQSLVGGPIASGLLGTDLDR,LYGCCVEQDGLLUVYELNLSLAR,LSAISLYQALCLGK                    | Leucine-rich repeat transmembrane protein kinase                 | 1,3178  | 1,0415  | 0,79032 | 0,14408762 | 0,38957674 | 0,15788845 |
| B9DH56 |             | 1 TPFYGSTLEELGKY                                                                    | AT3G01480                                                        | 2,0934  | 2,1566  | 1,0302  | 0,02516926 | 0,01117388 | 0,43108996 |
| Q9FLX9 | AT5G61240.1 | 2 HLDVGNHNLVGTIR,IPAEGLTLQNLR                                                       | leucine-rich repeat-containing protein                           | 1,0839  | 1,1166  | 1,0302  | 0,33751783 | 0,26763162 | 0,43108996 |
| Q9L739 | AT3G20820.1 | 7 SYFTVLDLSYNNLK,LSAIIADWK,LPFLR,TLDLGNQISGGIYDPIGR,ALLAFR,LAVLNVDNR,NLISGVIPS      | leucine-rich repeat-containing protein                           | 1,0033  | 0,59974 | 0,62172 | 0,1863095  | 0,01220392 | 0,04671641 |
| Q9FW48 | AT1G33600.1 | 1 LYLNLGNLTLGTPLGLANK                                                               | leucine-rich repeat-containing protein                           | 0,95985 | 0,8211  | 0,85545 | 0,40716384 | 0,16688934 | 0,23285287 |
| Q9SU56 | AT3G47930.1 | 3 LLALDPLNDVHAK,NFNQPNENLADLEALVK,VTVQAGIR                                          | L-galactono-1,4-lactone dehydrogenase                            | 0,87841 | 0,88038 | 1,0022  | 0,27075063 | 0,24381661 | 0,49362608 |
| Q9M320 | AT3G61470.1 | 10 LTTDVPYGGWGLFDPLGVGSSGPAK,IGLNTPSWYTAGEQEYFTDK,WNVQAEIVHCR,WAMLGAAGIFI           | Lha2 protein                                                     | 1,2451  | 1,1622  | 0,88159 | 0,11910663 | 0,12502722 | 0,34749418 |
| Q9XF85 |             | 2 FAMLGVAGLFTDLR                                                                    | Lha5 protein                                                     | 3,1138  | 1,1422  | 0,36683 | 0,00535041 | 0,2377417  | 0,0079484  |
| Q6LAC7 |             | 1 LGFVQHNVTGK                                                                       | light harvesting chlorophyll a/b binding protein                 | 0,75594 | 0,47549 | 0,62901 | 0,14224503 | 0,012231   | 0,06355894 |
| Q9LMQ2 | AT1G15820.1 | 9 DPAFLK,TAENFANYTGDQGYGGPR,FFDPLGLAGK,SWIPAVR,EAELIHR,WVDFNPDQSQSVWATPWS           | light harvesting complex photosystem II subunit 6                | 2,0669  | 2,1649  | 1,0023  | 0,44153264 | 0,49686901 | 0,44412411 |
| Q8L846 |             | 1 WGSIANIAADFAPPEK                                                                  | light induced protein like                                       | 1,6147  | 2,8407  | 1,7593  | 0,06347689 | 0,00310132 | 0,04077339 |
| Q957M0 | AT5G54270.1 | 8 WAMLGAFGCTPEVLQK,GPLENLHDLPVANNAWAFATK,ALEVIHR,YLGFSSVQTPSYLTGEPGDY               | light-harvesting chlorophyll B-binding protein 3                 | 0,85607 | 1,0567  | 1,3443  | 0,49305322 | 0,23361516 | 0,25123305 |
| Q3EAJ6 | AT3G54890.3 | 1 WAMLVAPGLVPEALGNGVWK                                                              | light-harvesting complex I chlorophyll a/b binding protein 1     | 2,5627  | 6,08    | 2,2725  | 0,0106699  | 7,42E-05   | 0,01398742 |
| Q9C5R7 | AT3G54890.1 | 4 YPGGAFDPLGYSK,ESLHCHR,WAMLVAPGLVPEALGNGVWK                                        | light-harvesting complex I chlorophyll a/b binding protein 1     | 1,1703  | 1,9156  | 1,6369  | 0,23630779 | 0          | 0          |
| Q39142 | AT2G34430.1 | 2 ASKPTGPGSSPWYGSDR                                                                 | light-harvesting complex II chlorophyll a/b binding protein 1    | 0,75935 | 0,7467  | 0,95367 | 0,2218635  | 0,34941796 | 0,28320703 |
| Q9SAE3 | AT1G13090.1 | 1 EIITGNEVALDLVQVFLH                                                                | cytochrome P450 71B28                                            | 0,47906 | 0,3676  | 0,76733 | 0,02516926 | 0,00362132 | 0,14132648 |
| Q65660 | AT4G39730.1 | 3 NLQAWAGLMPDPNYNFER,GNLDFISGR                                                      | Lipase/lipoxygenase, PLAT/LH2 family protein                     | 1,4965  | 2,6636  | 2,0277  | 0,11908981 | 0,00639157 | 0,04246689 |
| A8M568 | AT3G16950.2 | 3 AIGVDILTGFSGVLPQK,LAVHAHPTLSEVLEDELFLK,ALAEENEGEIAK                               | lipamide dehydrogenase 1                                         | 0,79359 | 0,77207 | 1,0613  | 0,25045    | 0,14624026 | 0,34085318 |
| P29513 | AT1G20010.1 | 2 YSGDTADLQLER,EVDEQILNIQNK                                                         | tubulin beta-5 chain                                             | 0,47936 | 0,37566 | 0,78367 | 0,02516926 | 0,00395658 | 0,15358365 |
| Q04983 | AT5G3560.1  | 2 LILDVEDFK,LLEEAPSPALTAELR,LIVWAPTR,SEAAAAFGNDGCYLEK                               | biotin carboxylase                                               | 0,52901 | 0,43217 | 0,83407 | 0,02590559 | 0,00626693 | 0,22571182 |
| Q9SR93 | AT3G08930.1 | 1 QCSAFTANPTEK                                                                      | LMBR1-like membrane protein                                      | 1,1925  | 0,95983 | 0,80491 | 0,21936801 | 0,38889733 | 0,17305111 |
| Q9M028 | AT5G01460.1 | 1 AADALHQEER                                                                        | LMBR1-like membrane protein                                      | 0,68682 | 0,95959 | 1,3918  | 0,10012196 | 0,3814227  | 0,11012598 |
| Q9T0A0 | AT4G23850.1 | 5 LLIEDLAEIKTFIVCAPR,EIVDQKPKG,VYSGLQK,GVMISNESIVTLIAGVIR,IILSGAAPLASHVESFLR,VIIECI | long chain acyl-CoA synthetase 4                                 | 0,82227 | 1,0102  | 1,2467  | 0,28514415 | 0,29005356 | 0,17383183 |
| Q9CAP8 | AT1G77590.1 | 6 GDVTLKPTIMTAVPAILDR,LLASPWPESGLVTAALK,LLWDDVLFVR,QGIDFANFEELCTK,MIPYAAGVIVP       | long chain acyl-CoA synthetase 9                                 | 1,0275  | 1,3396  | 1,2652  | 0,42754007 | 0,15574943 | 0,15627224 |
| Q8W471 | AT4G14070.1 | 1 FLLLLWGK                                                                          | long-chain acyl-CoA synthetase                                   | 1,0633  | 0,75376 | 0,70889 | 0,37103852 | 0,10971414 | 0,10386097 |
| Q95Q09 | AT2G35460.1 | 2 VAREVIAHTEVR,LASINVENVESNR                                                        | Fructose-bisphosphate aldolase, class I                          | 2,0721  | 3,0965  | 1,4944  | 0,02390559 | 0,00243954 | 0,07999502 |
| Q8LKS5 | AT5G27600.1 | 1 GTGVVSYQK                                                                         | long chain acyl-CoA synthetase 7                                 | 1,7933  | 3,0241  | 1,7126  | 0,04575845 | 0,00256777 | 0,04589544 |
| Q39043 | AT5G42020.1 | 1 VEIESLDFGVDLSLEPTR                                                                | Luminal-binding protein 2                                        | 1,4051  | 2,0439  | 1,5151  | 0,14551713 | 0,01655114 | 0,07919991 |
| Q8LKS6 | AT3G05970.1 | 5 ELGASDPSANR,WYSVYLLNQGR,GVLTLANLIANVAGSSFSVK,VDGTVGDYK,EVIDEDGWVLTHTDGLVL         | long-chain acyl-CoA synthetase 6                                 | 2,7547  | 3,8604  | 1,3903  | 0,02590559 |            |            |

|         |             |    |                                                                                |                                                            |         |         |         |            |            |             |
|---------|-------------|----|--------------------------------------------------------------------------------|------------------------------------------------------------|---------|---------|---------|------------|------------|-------------|
| Q9LX21  | AT5G01750.2 | 2  | VLLDGSSTPVVTLR,SCVYVYAGESDAIVAQMHR                                             | LURP-one-related 15 protein                                | 1,5262  | 0,87829 | 0,64234 | 0,12191578 | 0,24306048 | 0,0680739   |
| Q9C942  | AT1G52760.1 | 1  | LFTQSFPLDGEIK                                                                  | lysophospholipase 2                                        | 1,1134  | 1,5372  | 1,2775  | 0,18917409 | 0,03847704 | 0,13375719  |
| Q9ZP11  | AT3G11710.1 | 4  | FEFINK,KEIWWPGQTR,LVGFLEPTCVNFTIINQPEIMSPLAK,AAVADEEMDATQYENR                  | Lysyl-tRNA synthetase                                      | 1,3428  | 1,9788  | 1,4736  | 0,13416284 | 0,01634816 | 0,08427683  |
| Q9C7N2  | AT1G29690.1 | 1  | SLALVGYFIPLYDK                                                                 | MAC/Perforin domain-containing protein                     | 1,0003  | 1,7627  | 1,7622  | 0,49925283 | 0,02619155 | 0,04052356  |
| B3H4K6  | AT4G25080.4 | 2  | AYLHSEADVER,IYGEDVNR                                                           | magnesium-protoporphyrin IX methyltransferase              | 1,2055  | 1,3071  | 1,0842  | 0,21184587 | 0,11811992 | 0,33349195  |
| Q9M591  | AT3G56940.1 | 7  | EIQESLLTPR,NLNAEEFALLQEFK,LAIAEGTDDASFIK,TNPVVAEYFSLMSR,GLSDFNLALDLGLTK,TDYNC  | magnesium-protoporphyrin IX monomethyl ester [oxidative] c | 1,8002  | 1,5221  | 0,8493  | 0,03792779 | 0,06011687 | 0,16545095  |
| Q9FM78  | AT5G14120.1 | 1  | IGGGYFSELVVR                                                                   | major facilitator protein                                  | 2,0262  | 0,84896 | 0,419   | 0,02873593 | 0,19911192 | 0,01392798  |
| P57106  | AT4G34330.1 | 1  | TSVGEKPVV                                                                      | malate dehydrogenase                                       | 2,0606  | 1,9336  | 0,93839 | 0,02652238 | 0,10873933 | 0,36483812  |
| P93819  | AT1G04410.1 | 3  | VQTSSEKPVV,NGDWSIVQLPDIQVSR,MELIDAAFLLK                                        | malate dehydrogenase                                       | 1,3409  | 1,163   | 0,9127  | 0,11364212 | 0,07704558 | 0,48201906  |
| Q9S984  | AT3G47520.1 | 8  | GVAFANPKAAAAAN,VAVLGAAGGIGQPLSLIK,LTVEAAENCPNFIHHSNPNVSTVPIAAEVLK,DVNVVA       | malate dehydrogenase                                       | 1,132   | 1,3816  | 1,2257  | 0,33405095 | 0,0523105  | 0,10262434  |
| Q0WU56  | AT2G22780.1 | 3  | AGAGSATLSMAYAAVEFADACLAR,AIVNIISNPNVSTVPIAAEVLK                                | malate dehydrogenase                                       | 0,98054 | 1,4338  | 1,4565  | 0,4586391  | 0,05810662 | 0,07421825  |
| Q2V389  | AT5G09660.2 | 10 | VAILGAAGGIGQSLSLMK,QLEADTGMIDLVPAGIPR,LLGGVTLIDVAR,GDANVVECSFVASQVTELLAFA      | malate dehydrogenase                                       | 0,75008 | 0,10163 | 1,3265  | 0,16885097 | 0,19996677 | 0,08003804  |
| Q9LYG3  | AT5G11670.1 | 3  | DAHYLTGLLPPVLSQDVQER,FAESSMYPVYR,LLDNVEELLPVYPTVTEACQK,ATGQEQYAEFLHEFMC        | malate dehydrogenase (oxaloacetate-decarboxylating)[NADP+] | 1,5132  | 0,80454 | 0,56181 | 0,17691773 | 0,16898384 | 0,07464304  |
| Q9ZP06  | AT1G53240.1 | 7  | DDLFNINAGIVK,VAILGAAGGIGQPLALLMK,ALLEGADLVIIAPGVRP,SEVGYMGDNDLAK,LNPLVSSLSLY   | malate dehydrogenase 1                                     | 1,1992  | 1,5788  | 1,3166  | 0,2161792  | 0,04557805 | 0,13576487  |
| Q9LW85  | AT3G16000.1 | 3  | INLUSLELK,NSAIEENLR,LTSETQAAAADAEILSR,DLVTEGR                                  | MAR-binding filament-like protein 1                        | 1,2406  | 1,1867  | 0,96275 | 0,10806312 | 0,09124049 | 0,41087475  |
| Q9LVD9  | AT3G21690.1 | 1  | DVLSYAFTEK                                                                     | mate efflux domain-containing protein                      | 0,6315  | 0,65652 | 1,0396  | 0,06871065 | 0,05462372 | 0,41219396  |
| Q9LXQ2  | AT3G44100.1 | 1  | ISPDPVVSQAAATFK                                                                | MD-2-related lipid recognition domain-containing protein   | 0,8098  | 0,65264 | 0,80593 | 0,18917409 | 0,05301425 | 0,17307293  |
| Q8VZL4  | AT4G00290.1 | 2  | SFAELTIGCNLR,LLPVGFSNEDVPEYK                                                   | Mechanosensitive ion channel protein                       | 3,7866  | 1,6628  | 0,43912 | 0,00197437 | 0,03484347 | 0,01604344  |
| Q35WVW1 | AT5G37600.1 | 1  | VFSNPDVAAEVPPVWYIGIEQETLLQK                                                    | glutamine synthetase cytosolic isozyme 1-1                 | 2,0578  | 1,7701  | 0,86021 | 0,02654178 | 0,02592086 | 0,23892268  |
| Q9M4Z4  | AT3G4890.1  | 2  | TASAEGLSTTGEASATHDTSR,GQYVDVQSQR                                               | membrane steroid-binding protein 2                         | 1,6254  | 1,8253  | 1,0968  | 0,06494351 | 0,02907051 | 0,34243189  |
| Q1EC0   | AT5G54110.1 | 1  | SCVMRPPGVLVARGESVATVFK                                                         | membrane-associated mannitol-induced protein               | 1,3883  | 0,99384 | 0,71587 | 0,11932159 | 0,48179407 | 0,10811884  |
| Q64471  | AT2G19080.1 | 1  | DGVNLDLQQLSLSYLSLK                                                             | metaxin-related protein                                    | 0,98771 | 1,4593  | 1,4775  | 0,46816001 | 0,06833032 | 0,08325311  |
| P26587  | AT1G73190.1 | 1  | ADEATHDPSIR                                                                    | aquaporin TIP3-1                                           | 0,48634 | 0,63088 | 1,2972  | 0,02654178 | 0,0448421  | 0,14396051  |
| Q93276  | AT5G57870.1 | 1  | GVITLFDK                                                                       | MIF4G domain and MA3 domain-containing protein             | 1,6083  | 1,744   | 1,0844  | 0,06347689 | 0,02743583 | 0,3339955   |
| Q81062  | AT2G03120.1 | 2  | FANLALAGLTLAPLVVR                                                              | minor histocompatibility antigen H13                       | 0,89579 | 1,753   | 1,8122  | 0,46447374 | 0,02366639 | 0,03547632  |
| Q88XF8  | AT5G27540.1 | 13 | LPIEFFPDGIPVTVTDSSRPDR,EIETCIECSALK,DDLDDSSPIQESTR,LSLEYWLPRL,APDQSFELTNAIDFL  | MIRO-related GTP-ase 1                                     | 1,456   | 2,6264  | 1,7771  | 0,2492873  | 0,01740184 | 0,04946152  |
| Q93XM7  | AT5G46800.1 | 5  | EPVGNATMFAAYEAFK,GMGAPLATVAAFNALVTVR,SVLQVDDYK,LOQAQALAGASTSSVVAVK             | mitochondrial carnitine/acylcarnitine carrier-like protein | 1,0955  | 1,3484  | 1,195   | 0,38022547 | 0,49591147 | 0,37519001  |
| Q95VB2  | AT3G16000.1 | 2  | YQQGVDCVQTVIR,ELSDPENALGAFAGALTGAVITPLDVK                                      | mitochondrial carrier-like protein                         | 1,0286  | 1,4876  | 1,4462  | 0,43049918 | 0,0616115  | 0,09238405  |
| Q8L7F2  |             | 13 | GLWQPFPTALGNDPNSIDVK,NDVLVSTELNK,SVVTLSSDK,LEGLDSYIEGGTEK,EVQFVIVGK,FHSVVA     | mitochondrial F1-ATPase, gamma subunit [ATP3_ARATH]        | 1,0209  | 1,527   | 1,4653  | 0,39394212 | 0,09682281 | 0,099113303 |
| P82B73  | AT1G27390.1 | 2  | WGGALLELSQFPIPEAK,LEEALTNPKG                                                   | mitochondrial import receptor subunit TOM20-1              | 1,5126  | 2,0417  | 1,3336  | 0,12948732 | 0,02947581 | 0,15788845  |
| Q9FNC9  | AT5G43970.1 | 1  | ISMSEVSGQR                                                                     | mitochondrial import receptor subunit TOM22-2              | 1,5387  | 3,3219  | 2,1501  | 0,08215201 | 0,00271908 | 0,03043684  |
| Q9LHES  | AT3G20000.1 | 1  | SDNFEGLR                                                                       | mitochondrial import receptor subunit TOM140-1             | 0,81619 | 1,0423  | 1,2777  | 0,19663579 | 0,38857216 | 0,15355836  |
| Q9SRH5  | AT3G01280.1 | 8  | DLLYK,VNSAGIASLIQHEWPKP,INAGLSFTK,VCTDSFLTATVDEAEPGLR,DSITTVGTQHSLDPLTSV,F     | mitochondrial outer membrane protein porin 1               | 1,117   | 1,8295  | 1,5346  | 0,16637969 | 0,0133854  | 0,05825772  |
| Q9SMX3  | AT5G15090.2 | 9  | FVSTYTSYGVAITTTGTMK,VSTDLSLLTLTFDEPAPLKM,NMNFADAVK,HFNAGENFTK,ENAITVGTQHAI     | mitochondrial outer membrane protein porin 2               | 1,905   | 3,2338  | 1,6846  | 0,02516926 | 0,00084721 | 0,03547632  |
| Q04308  | AT3G16480.1 | 2  | VITKPLMTMGFDVLNPNVSDVSK,SAILMLNLSR                                             | mitochondrial processing peptidase                         | 0,87751 | 1,2104  | 1,3793  | 0,26998831 | 0,17190195 | 0,11454447  |
| Q9CSM0  | AT5G19760.1 | 8  | MQADNTLPAQR,IAPHVMMTWIFLNQITK,FYSGFPVYCVR,ALCGLTAGAIACGVSPADLALR,GCQPTV        | Mitochondrial substrate carrier family protein             | 1,1365  | 1,6619  | 1,3968  | 0,28320985 | 0,07434363 | 0,15691705  |
| Q9FHX2  | AT5G42130.1 | 2  | DGILGLYAGYATLLR,AIIGAGAGGLAGAFVTVLLPLDAIK                                      | Mitochondrial substrate carrier family protein             | 0,5708  | 0,23012 | 0,40316 | 0,04661118 | 0,00044965 | 0,01197314  |
| Q95SK7  | AT1G70850.3 | 2  | HGGSGSVVWHWFYEK,INEEVAHPETLLQAFVEVSK                                           | MLP-like protein 34                                        | 1,1709  | 0,25492 | 0,21771 | 0,23630779 | 0,00074766 | 0,00046994  |
| Q8GUM2  | AT4G37910.1 | 1  | IPAEISIEIATVSDLR                                                               | molecular chaperone DnaK                                   | 2,8786  | 17,504  | 0,6807  | 0,00649404 | 6,16E-08   | 7,94E-05    |
| Q940V1  | AT4G39960.1 | 1  | TCGGQGVVASTR                                                                   | molecular chaperone Hsp40/DnaJ family protein              | 1,4329  | 1,3229  | 0,91742 | 0,09929699 | 0,08169761 | 0,41363758  |
| Q9SU40  | AT4G12420.2 | 3  | RPLTGPAK,TENLDSVWLGQETVYR,ASGGFSFVNVNPR,STIQVYPGAWSAILSDNPGAWNLR,DQIGSFFY      | Monooxygenase-like protein SKU5                            | 0,53843 | 0,99842 | 1,827   | 0,03647136 | 0,19921999 | 0,05663097  |
| Q0WUV6  | AT3G52880.1 | 3  | EFANQGVQPELAVISK,VVGFAMEGGSDENK,TSNPVYVAGDVAITFLK                              | monodehydroascorbate reductase (NADH)                      | 1,2129  | 1,2288  | 1,0131  | 0,20541826 | 0,15860329 | 0,49697019  |
| Q9LXK4  | AT3G27820.1 | 1  | TGDFVLPFFYSR                                                                   | monodehydroascorbate reductase (NADH)                      | 0,72151 | 0,74916 | 1,0383  | 0,11932159 | 0,10677205 | 0,41453009  |
| Q96290  | AT1G20840.1 | 4  | EDVTDYEMALLVGLDIGEK,IAASGPLWALSLEPGVK,VLQQLCGR                                 | monosaccharide-sensing protein 1                           | 0,90248 | 0,94709 | 1,0494  | 0,30758306 | 0,36137505 | 0,39188416  |
| Q8LPR8  | AT5G22640.1 | 1  | PEPPDNPDSK                                                                     | MORN (Membrane Occupation and Recognition Nexus) repeat-c  | 1,2773  | 2,2339  | 1,7489  | 0,16384434 | 0,00960744 | 0,04164865  |
| Q8LGU1  | AT3G21250.2 | 1  | LLVDEATASIDSDAIQIR                                                             | multidrug resistance-associated protein 6                  | 0,91782 | 0,41841 | 0,45587 | 0,33099788 | 0,00677896 | 0,01900395  |
| Q8GUN1  | AT4G31400.1 | 2  | ALESQIDEK,IASLQTEVSSLQK                                                        | myosin heavy chain-related protein                         | 1,1533  | 3,1148  | 1,1567  | 0,42619086 | 0,19703166 | 0,19053138  |
| P37702  | AT5G26000.1 | 8  | NWITINQLTYVTPR,GFHGVASSAYQVEGGR,LPFSETEAALVK,GLNVWDSFTHR,IFFHGWFMGLTEPK,       | myosinase 1                                                | 0,55368 | 0,66208 | 1,1958  | 0,04274392 | 0,05672548 | 0,20845240  |
| Q9C5C2  | AT5G25980.2 | 6  | FSFAWSR,EFFLGFWMFELPK,DLVDVMEELGK,ASGLWYQSLR,GGADLNGDTCDSYR,GINEDGINVY         | myosinase 2                                                | 1,0368  | 1,1419  | 1,175   | 0,1897806  | 0,28097411 | 0,11983455  |
| Q80998  | AT2G25980.1 | 1  | ASPELVIQVGVYATPK                                                               | myosinase-binding protein-like protein                     | 0,58113 | 1,7513  | 3,0136  | 0,04822352 | 0,02686113 | 0,00499103  |
| Q9D5Z5  | AT4G37930.1 | 13 | GFVEEDFAK,SATLFRPK,HEVEEFAK,DFVSAEMSSITQSEIAK,LDESTGYIDYDQMEK,QLNAPLEVDPEIAI   | glycine hydroxymethyltransferase                           | 1,512   | 1,3343  | 0,84645 | 0,02805837 | 0,0186543  | 0,48975834  |
| Q8H124  | AT2G34460.1 | 6  | VDNFTVNLVADCR,IVEQLRS,DLVAEVAEALLQSESSFK,VFVAGATGQTKG,LAEVIGDSSQAVICATGFI      | NAD(P)-binding Rossmann-fold-containing protein            | 1,5136  | 0,74779 | 0,49682 | 0,06347689 | 0,09293496 | 0,1867507   |
| Q84WU9  | AT5G56900.2 | 1  | EVLAGLLK                                                                       | zinc finger CCH domain-containing protein 64               | 2,0231  | 1,8241  | 0,90162 | 0,02884344 | 0,02867878 | 0,29607696  |
| Q94956  | AT1G14345.1 | 1  | VTVISGLTGDDR                                                                   | NAD(P)-linked oxidoreductase-like protein                  | 1,1968  | 0,44457 | 0,37148 | 0,21729317 | 0,00931231 | 0,00830443  |
| Q94A68  | AT1G06690.1 | 4  | GIPLASNDQVNSLYR,AVGVSNSYEK,TPQJALNWLVAQGNVPIPGAK,FAALPWR                       | NAD(P)-linked oxidoreductase-like protein                  | 0,84012 | 0,99777 | 1,2214  | 0,29525989 | 0,44699663 | 0,26059071  |
| Q11P14  | AT4G28220.1 | 1  | AADANDSGTLLMEELGVDVDIR                                                         | NADH dehydrogenase                                         | 0,63611 | 0,73825 | 1,1606  | 0,07142542 | 0,09853101 | 0,23990571  |
| Q94313  | AT2G33220.1 | 2  | VGENVYNSGR,AIPLIQAEEEDR                                                        | NADH dehydrogenase                                         | 0,50406 | 0,32803 | 0,65078 | 0,03198338 | 0,0024715  | 0,07277915  |
| Q9FLX7  | AT5G52840.1 | 3  | TLEGLIAESK,AVESFR,AVJLDLYSK                                                    | NADH dehydrogenase (ubiquinone) 1 alpha subcomplex 5       | 0,76352 | 0,93127 | 1,2197  | 0,1468236  | 0,32795148 | 0,18816785  |
| Q9LH0   | AT3G12260.1 | 2  | VIDILLFK,VDFEFR                                                                | NADH dehydrogenase (ubiquinone) 1 alpha subcomplex 6       | 0,67863 | 0,92521 | 1,2962  | 0,10907499 | 0,30839936 | 0,13614308  |
| Q9SK66  | AT2G0360.1  | 7  | LALVAK,SVSGVATVFGATGFLGR,ANVIVNLNLR,VIQVSLGASVSSPSR,FQPVVVVVAVAIAALK,VFFF      | NADH dehydrogenase (ubiquinone) 1 alpha subcomplex 9       | 0,80593 | 0,75951 | 1,0087  | 0,13922032 | 0,0553681  | 0,25837114  |
| Q4Z577  | AT5G11770.1 | 1  | AAEFVISK                                                                       | NADH dehydrogenase (ubiquinone) Fe-S protein 7             | 0,87808 | 1,1136  | 1,2682  | 0,27025302 | 0,27146028 | 0,15735003  |
| Q8LAL7  | AT5G08530.1 | 6  | EAYAAGLLGK,LKPPFANAGLYCPTTVTNVAVSPTLR,ASAAYIIR,LEEDMLQEVTK,GGWNDLLAII          | NADH dehydrogenase (ubiquinone) flavoprotein 1             | 0,77271 | 0,85821 | 1,1196  | 0,10959147 | 0,20400226 | 0,19205589  |
| Q22769  | AT4G02580.1 | 3  | DIESALLHLGK,EILSYSPNYK                                                         | NADH dehydrogenase (ubiquinone) flavoprotein 2             | 0,85959 | 1,3265  | 1,5545  | 0,1441488  | 0,18306382 | 0,06581376  |
| P93306  |             | 6  | AAYPDVYDQLDFDVPVGR,VLFCEYR,LLFEYER,LVDIGTVTAQQAQ,APGFAHLQGLDFMSK,LLNCEVPLR     | NADH dehydrogenase (ubiquinone) iron-sulfur protein 2      | 0,75694 | 0,89698 | 1,1875  | 0,1505452  | 0,18015681 | 0,33072432  |
| Q95748  |             | 5  | YDFAPVPEQR,FDNTNDYFLQLCELF,ISSVFLSPAGWWR,VVSEPIEMTQEFR,VGSADEVTR,EVWV          | NADH dehydrogenase (ubiquinone) iron-sulfur protein 3      | 0,85884 | 1,2046  | 1,3588  | 0,0599686  | 0,12510572 | 0,15691705  |
| Q37165  | ATCG01100.1 | 3  | YSFLGGLR,IGPEYAGPLGILQALADGK                                                   | NADH dehydrogenase subunit 1                               | 0,801   | 1,2644  | 1,5992  | 0,18877558 | 0,19651045 | 0,08876987  |
| B5TM94  |             | 1  | NEILAESEFAATPIK                                                                | NADH dehydrogenase subunit 5                               | 0,66966 | 0,91042 | 1,2034  | 0,0753558  | 0,04295245 | 0,43108996  |
| B5TM95  |             | 5  | VLFCEYR,AAYPDVYDQLDFDVPVGR,LLFEYER,LVDIGTVTAQQAQ,LLNCEVPLR                     | NADH dehydrogenase subunit 7                               | 0,99822 | 0,85033 | 0,85185 | 0,49599304 | 0,20024699 | 0,22896149  |
| P56753  | ATCG01110.1 | 6  | VIMLELSR,AIQYLPVTVR,LSEMTESIK,IRPPGFINQLPELVK,IRVTLTDGEDVDCEPILGYLHR,IGJIAADLP | NADH dehydrogenase subunit 7                               | 0,83034 | 0,88987 | 1,0721  | 0,27863986 | 0,35677107 | 0,35685866  |
| P56755  | ATCG01090.1 | 1  | LPVITQYVYK                                                                     | NADH dehydrogenase subunit I                               | 1,1273  | 1,0843  | 0,96191 | 0,28530327 | 0,31133327 | 0,4121936   |
| P56754  | ATCG00420.1 | 1  | IPSVFVWVK                                                                      | NADH dehydrogenase subunit J                               | 0,89526 | 1,1645  | 1,3328  | 0,27394655 | 0,21549831 | 0,13546214  |
| Q29Q36  | AT5G20080.1 | 2  | IFYTVDNPTK,GYFDLLK                                                             | NADH-cytochrome b5 reductase-like protein                  | 1,6684  | 1,4957  | 0,95915 | 0,12948732 | 0,0693958  | 0,35646171  |
| P92558  |             | 1  | GPDDVGSFGLQPLADGK                                                              | NADH-ubiquinone oxidoreductase chain 1                     | 1,1199  | 1,4079  | 1,2572  | 0,29409355 | 0,0811332  | 0,1626314   |

|        |              |    |                                                                                   |                                                              |         |          |         |            |            |            |
|--------|--------------|----|-----------------------------------------------------------------------------------|--------------------------------------------------------------|---------|----------|---------|------------|------------|------------|
| Q05085 | ATI1G12110.1 | 3  | DQEGAGVTSNVFNK,LIGSPMTQVAIVVAAWR,ASVSGFSDQFDETEPK                                 | nitrate transporter 1.1                                      | 1,086   | 1,4107   | 1,2676  | 0,40185013 | 0,13221115 | 0,18794286 |
| COSVDS | AT3G44310.3  | 3  | YVEAASK,GAELVLFPEGGFYGPPR,VTVQSSVYNDTPATDK                                        | nitrilase 1                                                  | 1,3235  | 2,3276   | 1,8284  | 0,11661671 | 0,00617954 | 0,04132934 |
| P46010 | AT3G44320.1  | 1  | VTVQSSVYNDTPATDK                                                                  | nitrilase 3                                                  | 1,6891  | 1,7803   | 1,054   | 0,05198642 | 0,02532688 | 0,38205202 |
| Q95DM9 | AT3G16400.2  | 2  | VNDMTSEMITFLSK,GWTAJTATIDGK                                                       | Nitrile-specifier protein 1                                  | 1,2309  | 0,70105  | 0,57243 | 0,17831287 | 0,06809682 | 0,03547632 |
| 004316 | AT3G16410.1  | 5  | YNPEGLILGTFK,GWTAJTATIDGK,STDVDSLGAIVLSPTNHLHG,NGQTEAPLR,HLVYFDIESR               | Nitrile-specifier protein 4                                  | 0,5217  | 1,3511   | 2,7091  | 0,04771522 | 0,09147846 | 0,01392798 |
| Q9SRQ6 | AT3G03520.1  | 6  | SNPLTSDPNSAQIFFGK,VEETSSGGSSASPIK,ELVQEFVACVDR,ELNPEIDGVSESEPR,LPNVYVIEPR,DDI     | non-specific phospholipase C3                                | 1,0477  | 0,96652  | 0,94785 | 0,2218635  | 0,38558762 | 0,26059071 |
| Q9S816 | AT3G03540.1  | 1  | LLIEGFPQK                                                                         | non-specific phospholipase C5                                | 5,2065  | 2,6571   | 0,51034 | 0,00070441 | 0,00398083 | 0,02773627 |
| P29510 | AT5G0010.1   | 3  | LVSQVSSLTASLRS,LSLRIPTYTNLNR,TVGGGGDDAFNTFSETGAGK                                 | tubulin alpha-2/alpha-4 chain                                | 0,6263  | 0,58585  | 0,99211 | 0,03241734 | 0,02644344 | 0,28053259 |
| P93025 | AT5G08140.2  | 1  | FWNLFHLQPMR                                                                       | phototropin 2                                                | 0,51024 | 0,54251  | 1,0632  | 0,03313769 | 0,02168291 | 0,36785181 |
| Q94JY5 |              | 3  | NVIHSGDSVESAR,IIGATNPAASEPGTR,HYEDLSKK                                            | Nucleoside diphosphate kinase 1                              | 1,2296  | 1,3314   | 1,4072  | 0,25875065 | 0,04449242 | 0,11328473 |
| Q9LF61 | AT5G17630.1  | 1  | NPVVRPLNALGSAIAIFGTFLYSQATAK                                                      | Nucleotide/sugar transporter family protein                  | 0,33468 | 1,3667   | 0,40836 | 0,00630893 | 0,09424463 | 0,00082325 |
| Q9LN62 | AT1G19360.1  | 1  | TNPTLPDESINPR                                                                     | Nucleotide-diphospho-sugar transferase family protein        | 1,5717  | 1,406    | 0,89456 | 0,07142542 | 0,08169761 | 0,28589765 |
| Q22224 | AT2G41620.1  | 1  | QLLTELRL                                                                          | Nup93/Nic96 nucleoporin interacting component-containing pr  | 0,49235 | 0,92838  | 1,8856  | 0,02843003 | 0,32362958 | 0,03184562 |
| Q93V80 | AT2G40660.1  | 1  | EELSTLFAPIPVK                                                                     | OB-fold nucleic acid binding domain-containing protein       | 1,0415  | 1,2443   | 1,1947  | 0,40753751 | 0,14881932 | 0,20917653 |
| Q95QR1 | AT3G04010.1  | 1  | SDIIQEMTQVNFVLAQNK                                                                | O-Glycosyl hydrolases family 17 protein                      | 1,348   | 0,82964  | 0,63032 | 0,17677818 | 0,16177995 | 0,07249416 |
| Q9LKA6 | AT3G14990.3  | 2  | LVAEVLLDEVAEK,LAATCATAVESR                                                        | class I glutamine amidotransferase domain-containing protein | 0,51174 | 0,43749  | 0,85491 | 0,03358934 | 0,00848774 | 0,23198118 |
| P46312 | AT4G30950.1  | 1  | QIGEDLPEVNTLK                                                                     | omega-6 fatty acid desaturase                                | 0,94171 | 1,3954   | 1,4817  | 0,37308258 | 0,08506077 | 0,08303118 |
| Q9FCE1 | AT1G34000.1  | 2  | ILLSNFDLDE,EPQKPVPPSSQSSPPSPPPQK                                                  | one-helix protein 2                                          | 1,0921  | 1,0581   | 0,96889 | 0,32790447 | 0,35677107 | 0,42700519 |
| Q1H537 | AT5G18660.1  | 1  | INCVLPIHSGPK                                                                      | Rossmann-fold NAD(P)-binding domain-containing protein       | 1,9528  | 1,9536   | 0,9527  | 0,33358934 | 0,0174544  | 0,48760705 |
| Q9CAU9 | AT3G04830.1  | 1  | LNLLTSALR                                                                         | oryzanoltransferase-like protein                             | 0,51415 | 0,44385  | 0,86328 | 0,03399722 | 0,00931231 | 0,24165941 |
| Q9S785 | AT1G61790.1  | 2  | LFPCIEFSK,LAESMAEVEQR                                                             | OST3 and OST6 domain-containing protein                      | 1,0212  | 1,7347   | 1,6987  | 0,44832611 | 0,02828489 | 0,04731124 |
| Q9C5J8 | AT5G19620.1  | 2  | GLFGIVSDITLSSGGVNR                                                                | outer envelope protein                                       | 0,92294 | 2,0374   | 1,8343  | 0,18621086 | 0,00367439 | 0,01922562 |
| Q93W02 | AT5G24690.1  | 1  | FDLQNTLQK                                                                         | uncharacterized protein                                      | 1,9446  | 2,8863   | 1,4843  | 0,03399722 | 0,00293771 | 0,08303118 |
| Q9FFG3 | AT5G05520.1  | 4  | VYVLTQDWLK,GYSFISQIGGLAPDSR,QATTLQELKK,SSVGAGIVPPTSFLR                            | outer membrane OMP85 family protein                          | 0,67808 | 0,91711  | 1,3525  | 0,09579231 | 0,30336054 | 0,12394942 |
| Q8LGH9 | AT2G28900.1  | 3  | NAMLGAATGAVLSAVGK,PSSTFSVTSTPK,IGAVGTYK                                           | outer plastid envelope protein 16-1                          | 0,74441 | 1,4241   | 1,5765  | 0,07358752 | 0,03074754 | 0,32009677 |
| P23321 | AT5G66570.1  | 6  | GDEEELVK,LYTLDIEHGFPEVSDGSVNFK,IQGVWYQLE,QLDASGKPSDFGK,GTGTANQCPTIDGSGSE          | oxygen-evolving enhancer protein 1-1                         | 1,1301  | 1,0257   | 0,88636 | 0,15727102 | 0,27108039 | 0,24255511 |
| Q9S841 | AT3G50820.1  | 6  | GTGTANQCPTIDGSGSEFSFK,QLLEASGKPEFSFGK,LYTLDIEHGFPEVSDGSVNFK,IQGVWYQLE             | oxygen-evolving enhancer protein 1-2                         | 1,217   | 1,0477   | 0,90705 | 0,13062538 | 0,34941796 | 0,15353583 |
| Q42029 | AT1G04680.1  | 4  | HQLITATVYGGK,FDNFDFATSNLNMVPTDK,IEIEYPGQVLR,SITDYGSEPEFLSQVNYLLGK,TNTDFLPY        | oxygen-evolving enhancer protein 2-1                         | 1,3791  | 1,1705   | 0,91567 | 0,14833887 | 0,15939987 | 0,36629964 |
| Q9XFT3 | AT4G21280.2  | 3  | YDLNTHSSPK,YVAEYTSALNEVLAK,LFDTIDNLYAAK,DINVKPLDIR                                | oxygen-evolving enhancer protein 3-1                         | 0,98699 | 0,74524  | 0,77437 | 0,36096703 | 0,17457843 | 0,25789151 |
| Q8LE12 |              | 7  | WYVEIASFPRS,VAEEGVDYIISK,SYLWILSR,GFIEGSAYK,TAQMEETEYK,GVWVWFK,TPQSDTPPESENTAPEDS | outer membrane lipoprotein-like                              | 1,8569  | 2,8972   | 1,5384  | 0,03418244 | 0,00271908 | 0,07809191 |
| Q3E9P5 | AT4G37070.4  | 3  |                                                                                   | patatin-like protein                                         | 0,9689  | 0,90433  | 0,93336 | 0,4245653  | 0,28097411 | 0,35485881 |
| Q23179 | AT4G37070.2  | 1  | GIIAGVILAFLEK                                                                     | patatin-like protein                                         | 0,67617 | 0,57939  | 0,85687 | 0,09425809 | 0,02907051 | 0,23502215 |
| Q9LPS5 | AT3G17020.1  | 3  | ALSWAIDNVR,YALKPDAETDIVNTEA                                                       | universal stress protein (USP) family protein                | 1,9398  | 2,4321   | 1,2538  | 0,03418244 | 0,00636851 | 0,16437754 |
| Q56259 | AT1G72160.1  | 9  | QTVIEHIEK,AEFVPEEK,EGHPVPCVNYVGFQNK,IDEVLEEDVDDLK,LDLSNLSK,EALDNHQFTNTPEEI        | patellin-1                                                   | 1,2703  | 0,9509   | 0,76682 | 0,37451204 | 0,30953756 | 0,24929874 |
| Q56212 | AT1G22530.1  | 19 | VGLTDEPVITDSFK,FAAADQCEETK,SAETIFK,UYVAPEVVPVK,NALAEK,VSEVAVPEVETAVK,EFPTAPP      | patellin-4                                                   | 0,75661 | 0,71434  | 0,98453 | 0,13425726 | 0,14624026 | 0,34755475 |
| Q940I8 | AT1G09410.1  | 2  | TPFLVINAADFWSQIK,VVALHGSAK                                                        | Pectinacetyltransferase family protein                       | 0,98371 | 1,1653   | 1,1846  | 0,45852089 | 0,21011354 | 0,21796349 |
| Q49006 | AT3G14310.1  | 3  | ADATVAADGSGTFK,DITFQNTAGPSK,TDPNQNTGIVQK,TLSSAITNQETCLDGFHDDADK,EYSNTGAG          | pectinesterase 3                                             | 1,5233  | 1,0212   | 0,70265 | 0,24842803 | 0,49591147 | 0,24135993 |
| Q8L790 |              | 3  | DQIGSFYFPLSGFKH,LASSAGQVDGK,IPVFPDPAGDITLVLDGWYK                                  | pectinesterase, putative                                     | 1,0113  | 1,1149   | 1,1025  | 0,47056993 | 0,27017167 | 0,30767359 |
| Q9LQ23 | AT1G55890.1  | 1  | YLVGQTLQQLVDLQK                                                                   | pentatricopeptide repeat-containing protein                  | 1,3778  | 2,895    | 2,1012  | 0,12161525 | 0,00290283 | 0,02145069 |
| Q9LK57 | AT3G23160.1  | 3  | LDEAITWYK,LLVDEAVLQEVVDALVK                                                       | pentatricopeptide repeat-containing protein                  | 1,2574  | 2,5782   | 2,5714  | 0,11570538 | 0,00983023 | 0,06464314 |
| Q8LEZ4 | AT1G19520.2  | 1  | VDWIALNQLR                                                                        | pentatricopeptide repeat-containing protein                  | 1,0219  | 3,0859   | 3,0196  | 0,44693534 | 0,00243954 | 0,00499103 |
| P35614 | AT3G26618.1  | 1  | YFEEISQDTGK                                                                       | peptide chain release factor eRF subunit 1                   | 1,0491  | 1,167    | 1,1124  | 0,3931149  | 0,20850578 | 0,29273525 |
| Q9M390 | AT3G54140.1  | 3  | IFQVVAAR,LCSVTQVEELK,AAVESQSDSIK                                                  | peptide transporter PTR1                                     | 0,72547 | 0,7068   | 0,97426 | 0,12161525 | 0,07912739 | 0,43816765 |
| P46032 | AT2G02040.1  | 5  | LAYYIAGNLTLYTK,AAVISEEEK,ISOVYVASFRL,YAEDGSDVDFGNPNLKL                            | peptide transporter PTR2                                     | 1,0182  | 1,4395   | 1,3181  | 0,22317613 | 0,45179792 | 0,23559881 |
| Q38900 | AT2G16600.1  | 1  | HVFGQVVEGLNVR                                                                     | Peptidyl-prolyl cis-trans isomerase CYP19-1                  | 1,2042  | 1,9739   | 1,6391  | 0,21268017 | 0,01649625 | 0,05552923 |
| Q9AS56 | AT5G13120.1  | 1  | IVIGLVGDDVPQTVENFR                                                                | Peptidyl-prolyl cis-trans isomerase CYP20-2                  | 1,0231  | 1,2772   | 1,3638  | 0,23630779 | 0,08707745 | 0,21692022 |
| P34791 | AT3G62030.1  | 1  | IYACGELPDA,IVMGLFGEVVPK                                                           | Peptidyl-prolyl cis-trans isomerase CYP20-3                  | 1,0457  | 0,91878  | 0,89238 | 0,25489378 | 0,13214134 | 0,29926809 |
| Q9S5A5 | AT3G01480.1  | 1  | TPPYGSTLEELGLYK                                                                   | peptidyl-prolyl cis-trans isomerase CYP38                    | 1,1169  | 1,2819   | 1,1477  | 0,29634953 | 0,12933635 | 0,25206288 |
| Q96520 | AT1G71695.1  | 8  | QQAFVIVNNLR,LYPNQDPTMKNQFVANSK,YYVDLMNR,DSVLSGGDQVAVPLGR,SPDVFDNK,DIGLAA          | peroxidase 12                                                | 1,0535  | 0,8833   | 0,84335 | 0,30717238 | 0,19358982 | 0,13614308 |
| Q9WL69 | AT3G2830.1   | 4  | TSQVLSGGHTFR,GLIQSDQELFSTPGADTLPVNLQYSSDMSVFR,GFNVDR                              | peroxidase 22                                                | 1,2334  | 1,6168   | 1,3153  | 0,19991482 | 0,02416521 | 0,08429118 |
| Q80912 | AT3G2830.1   | 1  | TCPPYFIIGDITWNLNR                                                                 | peroxidase 23                                                | 0,59411 | 4,4749   | 7,9267  | 0,04518813 | 0,00036465 | 1,58E-05   |
| B9DHE0 | AT3G2980.1   | 7  | MENITPTGTGQIR,DSLQAFALLANTNLPAPFFTLPLQK,AAVETACPR,TVSCADILIAQAQVNLGAGPS           | peroxidase 32                                                | 1,2455  | 1,136    | 1,1992  | 0,11609178 | 0,12530114 | 0,33277448 |
| Q41932 | AT4G05180.1  | 2  | YDLNTHSSPK,LFQTDINDLYAAR                                                          | oxygen-evolving enhancer protein 3-2                         | 0,51641 | 0,48889  | 0,94669 | 0,03424101 | 0,01348007 | 0,37789765 |
| Q9LDN9 | AT4G08770.1  | 2  | TCQPVDIATITVNNLR,TVSCADLLIAAQESVNLGAGPSWR                                         | peroxidase 37                                                | 2,1139  | 9,5435   | 4,5147  | 0,02437822 | 4,34E-06   | 0,00048373 |
| Q96522 | AT4G30170.1  | 1  | STVNSFANSEGR                                                                      | peroxidase 45                                                | 0,69944 | 1,1114   | 1,589   | 0,10834393 | 0,2742757  | 0,06355894 |
| Q53YQ5 | AT5G17820.1  | 7  | GCDASLDSTNSEK,VGFYSQSCQPAETIVR,DSVALAGGSPYSIPTGR,NSATAALDQSSPLR,FGVPTVTAAL        | peroxidase 57                                                | 0,38298 | 0,78979  | 2,0622  | 0,00989442 | 0,13614272 | 0,02332326 |
| Q96511 | AT5G64100.1  | 4  | SVQSHVR,ISQASDWNLPGPSDSVAK,VVLSQDLVLWK,LNTLTLVLGGHTGTAGCGLVR,DAVVLVGG             | peroxidase 69                                                | 0,26854 | 0,73974  | 2,8431  | 0,00119159 | 0,09601886 | 0,00380368 |
| Q9FXTE | AT5G62810.1  | 1  | AAASAASDVAR                                                                       | peroxin 14                                                   | 1,4265  | 1,9591   | 1,5477  | 0,11932159 | 0,01662694 | 0,10264234 |
| Q9XEX2 | AT1G65980.1  | 1  | FALLDDLK                                                                          | peroxiredoxin-2B                                             | 1,2423  | 1,2548   | 1,0351  | 0,23142653 | 0,11094188 | 0,27726892 |
| Q9LTV6 | AT3G12800.1  | 1  | QVLDVAVALR                                                                        | peroxisomal 2,4-dienoyl-CoA reductase                        | 1,6205  | 3,1011   | 1,9137  | 0,06266339 | 0,00243954 | 0,03075562 |
| Q65202 | AT4G16760.1  | 2  | AEDWLNPDVLEAFEAR                                                                  | peroxisomal acyl-coenzyme A oxidase 1                        | 2,3259  | 4,653    | 2,0005  | 0,01630164 | 0,00033184 | 0,02635736 |
| Q9FZ71 | AT1G47750.1  | 1  | ILHALLIPETR                                                                       | peroxisomal membrane protein 11A                             | 9,9546  | 1,9273   | 0,19361 | 1,43E-05   | 0,01800598 | 0,00020764 |
| Q9LQ73 | AT1G01820.1  | 2  | FLSDGQPGTAQNVDK,FVNDLHALISVPVK                                                    | peroxisomal membrane protein 11C                             | 1,0791  | 1,2254   | 1,2106  | 0,19663579 | 0,11664798 | 0,35743897 |
| Q80845 | AT2G45740.3  | 4  | VTFAGFTIISICYQLLTPRPK,YQDEYR,FVNDLHALISVPVK,FLSGGQPGTAQNVDK                       | peroxisomal membrane protein 11D                             | 0,94995 | 1,2422   | 1,2263  | 0,17906573 | 0,24306048 | 0,30883003 |
| Q84JW1 | AT3G61070.3  | 2  | AELALVLYNK,FLSGGQPGTAQVTDK                                                        | peroxisomal membrane protein 11E                             | 1,2626  | 1,9172   | 1,4958  | 0,21721359 | 0,03548118 | 0,11243939 |
| Q8H112 | AT4G22890.3  | 2  | IDGSDIVEGPR,CTNCGTAMVYDSSGR                                                       | PGR5-like protein 1A                                         | 1,1954  | 0,85629  | 0,81528 | 0,11932159 | 0,02907051 | 0,17153826 |
| Q95TL8 | AT3G48380.1  | 1  | SLQITSWFR                                                                         | putative Ufm1-specific protease                              | 1,9345  | 3,0496   | 1,5764  | 0,03424101 | 0,0024715  | 0,06567516 |
| Q9FMU6 | AT5G14040.1  | 17 | IGMVGLFTR,GIEMYSPAFYAACFTGGISGLTHTMTVPLDLVK,GWVPTLLGSAQAGK,TSYDLAGEPYT            | phosphate transporter 3                                      | 1,2612  | 1,6211   | 1,2712  | 0,19991482 | 0,14602234 | 0,44412411 |
| Q9C5G5 | AT3G51460.1  | 2  | SIFGVVGLMK,LSLIEQIEGFLK                                                           | phosphatidylinositol-4-phosphate phosphatase RHD4            | 1,0261  | 1,4152   | 1,3046  | 0,27571203 | 0,3425837  | 0,36785181 |
| AGNAB  | AT4G25970.1  | 4  | SVSDADFAGIALTLGAEIK,GLLNGDQSDAFDLGSLVIFR,FVNVSGSLYTNVPIAVNSK                      | phosphatidylserine decarboxylase 3                           | 1,1627  | 0,63821  | 0,54893 | 0,24242069 | 0,04737346 | 0,03588478 |
| P29976 | AT4G39980.1  | 1  | AFDLSLAER                                                                         | phospho-2-dehydro-3-deoxyheptanate aldolase 1                | 1,1231  | 1,5781   | 1,4051  | 0,28995258 | 0,04558104 | 0,10550515 |
| Q6ZVY1 | AT5G26570.1  | 1  | LGSVGFLLER                                                                        | phosphogluconate kinase                                      | 0,86071 | 0,95616  | 1,1109  | 0,24294789 | 0,38178267 | 0,29405411 |
| Q8H103 | AT4G24620.1  | 1  | DGVHNFATFIEVLR                                                                    | phosphoglucose isomerase 1                                   | 0,73329 | 0,99529  | 1,3573  | 0,12801913 | 0,48603608 | 0,12230716 |
| Q8LQ6  |              | 2  | ALDAGIVAQAALDVFTK                                                                 | Phosphoglycerate dehydrogenase-like protein                  | 0,69577 | 1,1197   | 1,6093  | 0,1059528  | 0,26402898 | 0,05963097 |
| Q9SA44 | AT1G79550.2  | 2  | YSXKPLVPR,LVAGLPEGGVLLNVR,VDLNVLDDNSNITDTR                                        | phosphoglycerate kinase                                      | 1,1426  | 0,9051</ |         |            |            |            |

|        |             |    |                                                                                    |                                                                     |         |         |         |            |            |            |
|--------|-------------|----|------------------------------------------------------------------------------------|---------------------------------------------------------------------|---------|---------|---------|------------|------------|------------|
| Q9FNA9 | AT5G13640.1 | 1  | AIAPGLDITDFR                                                                       | phospholipid:diacylglycerol acyltransferase 1                       | 0,71966 | 1,0436  | 1,4501  | 0,11932159 | 0,38634643 | 0,09091872 |
| Q8L970 |             | 1  | LSFDVWDVK                                                                          | unknown                                                             | 0,52193 | 0,31669 | 0,60677 | 0,03514917 | 0,00229085 | 0,05476911 |
| P25697 | AT1G32060.1 | 12 | GNPNDSNLTSDTTTVCILDDYHSLDR, LTVSFGGAAPKPK, QYADAVIEVLPTLPPIDNEGK, LDELIYVESHLS     | phosphoribulokinase                                                 | 0,59136 | 0,67578 | 1,1064  | 0,23630779 | 0,4818143  | 0,23682267 |
| Q547D7 |             | 1  | SFNQLIETLIDR                                                                       | phosphorybosyl anthranilate transferase 1                           | 1,3177  | 1,3014  | 0,98757 | 0,14408762 | 0,12133318 | 0,46793219 |
| Q94K59 | AT4G24350.1 | 3  | QITNAGLWLDWLNPKD, GPPYIGLVTVIATEENAFRLR                                            | phosphorylase family protein                                        | 0,89064 |         | 1,2455  | 0,11723348 | 0,26070743 | 0,17026467 |
| Q9ZV56 | AT2G32260.1 | 1  | MGTAIVDSIQGR                                                                       | phosphorylcholine cytidyltransferase                                | 1,1492  | 1,3781  | 1,1992  | 0,25842729 | 0,09060668 | 0,20537949 |
| P56788 | ATCG00520.1 | 1  | AELAYFLR                                                                           | photosystem I assembly protein Ycf4                                 | 1,0901  | 1,7679  | 1,6217  | 0,33033186 | 0,02593261 | 0,05824561 |
| P56766 | ATCG00350.1 | 9  | YNDLLDR, ALSIIQGR, AVGVTHYLLGGIATWAFLLR, ANLGR, GVLFAR, DLLAQYPSFAEGATPFFTLNW      | photosystem I P700 chlorophyll a apoprotein A1                      | 1,1822  | 0,92591 | 0,86289 | 0,30314377 | 0,23940646 | 0,15735050 |
| P56767 | ATCG00350.1 | 15 | NFNGIGHSK, IWFGIATAHDFHDDHTEER, YWQWELIETLAWAHER, TPLANLIR, GGALGPVNIAYSQVYQ       | photosystem I P700 chlorophyll a apoprotein A2                      | 1,2389  | 0,87257 | 0,80594 | 0,22642083 | 0,1854632  | 0,10388456 |
| Q957H1 | AT4G02770.1 | 8  | TDSAAAAAATK, EGVGLNMR, AQVEEFPVITWNSPK, VFPNGEVQYLHPK, EQIFEMPTGGAAIMR, ITYQ       | photosystem I reaction center subunit II-1                          | 0,84762 | 0,78769 | 1,0161  | 0,42619086 | 0,12309784 | 0,12852101 |
| Q95HE8 | AT1G31330.1 | 7  | GFWIPVAAAR, YLGLCGSDGLPHLVINGDQR, EIUIDVPLASR, SYLAISGK, EFLNGDLIAK, LYAPESAPALANL | photosystem I reaction center subunit III                           | 1,5266  | 0,91415 | 0,56751 | 0,04040215 | 0,46095579 | 0,14385105 |
| Q95831 | AT4G28750.1 | 2  | VNYANISTNNYALDEVEEAA, DSPAAAAADPGATATKPPPPGPK                                      | photosystem I reaction center subunit IV A                          | 3,4944  | 1,6199  | 0,46358 | 0,00296118 | 0,04031805 | 0,01994209 |
| Q95714 | AT2G20260.1 | 5  | VNYANISTNNYALDEVEEAA, AKPPPIPK, AAEDTPPATASDSSSTTAAAPAK                            | photosystem I reaction center subunit IV B                          | 1,8264  | 1,4596  | 1,107   | 0,36417609 | 0,16863695 | 0,14369822 |
| P49107 | AT5G64040.1 | 2  | PFENFTGCQDLAK, VPFISEDIALECEK                                                      | photosystem I reaction center subunit N                             | 1,7317  | 0,81441 | 0,46671 | 0,04661118 | 0,24306048 | 0,02638708 |
| Q957N7 | AT1G55670.1 | 3  | FFNFQFR, THFEAGDDR                                                                 | photosystem I reaction center subunit V                             | 1,4848  | 1,184   | 1,1     | 0,13960785 | 0,32795148 | 0,17419534 |
| Q0WUW6 | AT3G16140.1 | 2  | FFFTFAAFTK, FULGGGSLTVYASSTGVEPLIK                                                 | photosystem I reaction center subunit VI-1                          | 1,4493  | 0,96125 | 0,70488 | 0,14158087 | 0,34770623 | 0,10404588 |
| Q95U16 | AT1G52230.1 | 1  | FULGGGSLTVYASSTGVDLPIK                                                             | photosystem I reaction center subunit VI-2                          | 0,86006 | 0,97581 | 0,92529 | 0,24242069 | 0,14149413 | 0,33964563 |
| Q95U14 | AT4G12800.1 | 5  | GVEVGLAHGFFVGPVFK, QPDQLGADGWAK, EGEPASPLTLTGR, TAVNPLLR                           | photosystem I reaction center subunit XI                            | 1,2874  | 1,0677  | 0,92772 | 0,24318492 | 0,18433221 | 0,11195408 |
| P62090 | ATCG1060.1  | 4  | ACTPDLVLEMPWIDGCK, HDTCGCTQCVR, CESACPTFLFSVLR, VYLWHEHTR                          | photosystem I subunit VII                                           | 1,7562  | 2,1518  | 1,2987  | 0,28379817 | 0,38748556 | 0,22571128 |
| Q9X91  | AT1G4475.1  | 8  | AVIPRGS, ANELPGR, VEDGIFGTSGGIFTK, FITDDGEE, LAQLGIAFSLGIEITGK, VAMIGFAASLGEALT    | photosystem II 24 kDa protein                                       | 2,1022  | 1,9335  | 1,0768  | 0,42002701 | 0,0693958  | 0,07814145 |
| P56778 | ATCG0280.1  | 3  | APWLLELR, TNLTLSPVIFGKLLK, SAEYTHAPLGSNSVGVATEINAWNYVSR                            | photosystem II 44 kDa protein                                       | 1,1075  | 0,61379 | 0,51204 | 0,35149027 | 0,00342716 | 0,01057435 |
| P56777 | ATCG00680.1 | 15 | VHTVYLVNDRGR, VSAGLAENQSLSEAWK, YQWDDQYFGQYR, MPFTFPPVLDGQDQYR, DVYFAGIC           | photosystem II 47 kDa protein                                       | 1,1966  | 1,049   | 0,86473 | 0,3876651  | 0,33799264 | 0,27772461 |
| Q957J7 | AT2G05070.1 | 2  | WAMLGALGCTPEILSK, IGGGDLPLPYGGADFLNLAEDPEAFSELK, GPENLFDHLPADVANNAM                | photosystem II light harvesting complex protein 2.2                 | 2,1824  | 1,9734  | 1,0577  | 0,11568153 | 0,047496   | 0,28894266 |
| P83755 | ATCG00220.1 | 10 | ETENESANEGR, FGQEEETYNVAHGYGR, ESELSWGR, VINTWADINR, EWELSFR, ANLGMVEMHR           | photosystem II protein D1                                           | 1,2405  | 1,1378  | 0,90372 | 0,29965193 | 0,38317006 | 0,36371306 |
| P56761 | ATCG00270.1 | 10 | DLFIDMDWLR, WCQLGGLWAFVALHGAFAUGFMRL, NILLNEGIR, FWSQIFGVAFNSK, AYDFVQSER, Q       | photosystem II protein D2                                           | 1,1643  | 1,0311  | 0,87875 | 0,40683029 | 0,31995215 | 0,27742113 |
| P60129 | ATCG00560.1 | 1  | TQSNPNQSQVELNR                                                                     | photosystem II protein L                                            | 1,3004  | 1,0543  | 0,81074 | 0,15102512 | 0,36465123 | 0,17723299 |
| Q9L964 | AT1G03600.1 | 2  | DIYSLNVAISGHYVSGFPTAPIPAK, IJEEEMTEAK                                              | photosystem II Psb27 protein                                        | 1,6168  | 1,4312  | 0,95083 | 0,04823352 | 0,32702643 | 0,06053473 |
| Q82660 | AT5G23120.1 | 13 | SAEMVTDGAIYVTSNR, AAIQVTSATLNR, SPISAEEEDFNRY, GTGITTEFEVVPVQSR, QTLTLEK, IPLSSQLF | photosystem II stability/assembly factor HCF136                     | 1,1484  | 1,1165  | 0,99112 | 0,22069077 | 0,16604258 | 0,44368492 |
| P27202 | AT1G79040.1 | 1  | YGANVDGYSPIYNEWASDGVQK                                                             | photosystem II subunit R                                            | 0,73622 | 1,006   | 1,3664  | 0,12948732 | 0,4818143  | 0,11842417 |
| A8MS49 | AT5G58140.3 | 2  | ATATNVDEAVR, GINWPLR, QLINTLLNR                                                    | phototropin 2                                                       | 0,74253 | 0,89115 | 1,1956  | 0,15102512 | 0,31930478 | 0,2004875  |
| Q8H0W8 |             | 1  | SAPILQIR                                                                           | Unknown protein                                                     | 1,9158  | 2,1272  | 1,1104  | 0,03514917 | 0,01183842 | 0,29407478 |
| Q94E11 |             | 7  | VEDGIFGTSGGIFTK, FITDDGEE, LAQLGIAFSLGIEITGK, VAMIGFAASLGEALTGK, FVDDPPTGLK        | At1g44575/118F15                                                    | 0,52207 | 0,55254 | 1,0584  | 0,03514917 | 0,02357655 | 0,3753126  |
| Q07356 | AT4G14210.1 | 2  | VVIAGAGLAGLSTAK, SLGGEVQLNSR                                                       | plastoquinone dehydrogenase                                         | 1,3511  | 1,8628  | 1,3787  | 0,13242562 | 0,02067516 | 0,11454667 |
| Q2V3F7 | AT4G23470.3 | 2  | CPQLCLATEVFCFANSVASTR, FLQDEFQIQTKT                                                | PLAC8 family protein                                                | 1,1527  | 1,5522  | 1,3466  | 0,25416001 | 0,04947189 | 0,12567625 |
| Q9FVQ1 | AT1G48920.1 | 4  | GERPAFTPSQGNFR, GFHGEVFASSAEAK, SSDVEMVDAEK, GFDAISLEDDIK                          | nucleolin                                                           | 1,781   | 1,786   | 0,98905 | 0,03655796 | 0,01434903 | 0,35685866 |
| Q80796 | AT1G65260.1 | 2  | GVVDNLVSNTR, SFADNATALK                                                            | plastid transcriptionally active 4                                  | 0,95979 | 0,83778 | 0,87485 | 0,33667925 | 0,34558619 | 0,24617869 |
| Q56277 | AT5G16150.3 | 2  | DLGIAENTVLQGVVSLLAGATVGSFTGGALADK, SLEELIHALTSGA                                   | plastid glucose transporter 4                                       | 0,82066 | 0,6285  | 0,75127 | 0,2069276  | 0,00787023 | 0,03075562 |
| P42699 | AT1G20340.1 | 2  | NNAGYPHNVVFEDEIPSGVDVAK                                                            | Plastocyanin major isoform                                          | 1,6432  | 1,8776  | 1,1426  | 0,05996128 | 0,02029567 | 0,25750962 |
| Q9FC9C | AT5G53540.1 | 1  | LQAIHFIDEVDSFLGGR                                                                  | P-loop containing nucleoside triphosphate hydrolase-like protein    | 1,2118  | 1,4859  | 1,2261  | 0,20653755 | 0,06193731 | 0,18310043 |
| Q9FXA2 | AT1G49760.2 | 2  | GYGFYQYDTEAAQGAIDK, NLSSESDEELNK                                                   | poly(A) binding protein 8                                           | 0,69037 | 1,1367  | 1,6466  | 0,10215749 | 0,24306048 | 0,05485487 |
| Q80915 | AT2G3860.1  | 1  | NFINQITETK                                                                         | PRA1 family protein B4                                              | 0,99763 | 1,7779  | 1,7822  | 0,49496207 | 0,02547932 | 0,03854945 |
| P57681 | AT5G63910.1 | 3  | MSFIENTVDNFK, LSEALQSPLLVNLVETVTR                                                  | prenylcysteine oxidase                                              | 1,0563  | 1,8755  | 1,7756  | 0,38180254 | 0,02040688 | 0,03932243 |
| Q9SRM4 | AT3G11200.1 | 1  | LFSLINDPLTFDVTGR                                                                   | alfin-like 2 protein                                                | 1,8897  | 3,0985  | 1,6397  | 0,03706326 | 0,00243954 | 0,0555293  |
| Q38885 | AT2G13870.1 | 5  | LLGLFALS, LGNGSLFTLSSIYSPASFR, EAFVNGDNLQNSLSTLDTFSGGGIR, GVAAAEDESSIDFGDFK        | Preprotein translocase subunit secY                                 | 1,3532  | 1,919   | 1,4639  | 0,09779852 | 0,06153477 | 0,46388171 |
| COLGG8 |             | 1  | GOSTSVSSER                                                                         | Probable LRR receptor-like serine/threonine-protein kinase At1g     | 1,3734  | 1,2737  | 0,98533 | 0,16002849 | 0,13401989 | 0,47047242 |
| Q9ZNT7 | AT1G03860.3 | 3  | YLLSNDLLLNQEMNLEPK, LPQYR, VPINIPGAPALSALK, EIAQTIAQSANK                           | prohibitin 2                                                        | 1,3625  | 2,3235  | 1,6453  | 0,11445402 | 0,00799285 | 0,05507663 |
| Q04331 | AT5G40770.1 | 4  | VLSRPEVSR, AAFGLGTAATVNLSTLTVDDGGR, SPNVAYLPGGQSMFLALNR                            | prohibitin 3                                                        | 1,3167  | 2,5105  | 1,7584  | 0,10965279 | 0,00583395 | 0,04132994 |
| Q9LK25 | AT3G27280.2 | 1  | AVAVNFADQLLTERPQVSALVR                                                             | prohibitin 4                                                        | 1,8369  | 6,69    | 3,5219  | 0,04386127 | 7,19E-05   | 0,00264551 |
| Q95L16 | AT2G20530.2 | 3  | SAQLCGAIQANQDAPLTLR, AKPPLVSTSGSR                                                  | prohibitin 6                                                        | 1,4166  | 5,0062  | 3,1314  | 0,1143373  | 0,00325212 | 0,02638708 |
| Q8L439 |             | 3  | AANFNVAIDVYSITLTFK, ARPYLVSTSGSR, EIAQTIANSAK                                      | prohibitin-like protein                                             | 1,6836  | 5,1604  | 2,8862  | 0,05725506 | 0,00036465 | 0,00775371 |
| Q39221 | AT2G01470.1 | 4  | VDLNTNSLSEQLGR, EDNQAGESEEVK, GSGIITCDK, LLAIGTLGDDVILILESTR                       | prolactin regulatory element-binding protein                        | 1,0519  | 1,2965  | 1,0999  | 0,1014605  | 0,32795148 | 0,43108996 |
| Q9FL44 | AT5G07020.1 | 1  | AVDYSGSLSYNNK                                                                      | proline-rich family protein                                         | 1,3075  | 0,66727 | 0,51033 | 0,14833887 | 0,05915108 | 0,0277367  |
| Q9M1R2 | AT3G62120.2 | 5  | LILAPWCDEEVEER, DLENDQVR, IYEEYLVVVK, AEADVEQLLELYR, NCYFPLVSPGVLEK                | prolyl-RNA synthetase                                               | 1,1707  | 1,0905  | 1,1026  | 0,48810215 | 0,29413749 | 0,32296136 |
| Q42044 | AT2G45180.1 | 1  | TRCCTLQGLANLEAAVCLCTALK                                                            | protease inhibitor/seed storage/lipid transfer protein (LTP) family | 1,115   | 0,62415 | 0,5684  | 0,47794873 | 0,0194921  | 0,03225315 |
| Q8W4A0 | AT3G02200.2 | 1  | ELFLAIANVK                                                                         | Proteasome component (PC1) domain protein                           | 0,72407 | 1,4385  | 1,9867  | 0,1203441  | 0,0733292  | 0,0266249  |
| Q23712 | AT1G47250.1 | 1  | SSLCTVSVLGVDEPFFHLQDESQIK                                                          | proteasome subunit alpha type-1-B                                   | 0,89616 | 0,22988 | 0,25652 | 0,29763493 | 0,00044965 | 0,00111953 |
| Q8L4A7 | AT1G79210.3 | 2  | LQIEHALTAVSGGQSLGK                                                                 | proteasome subunit alpha type-2-B                                   | 1,001   | 1,4272  | 1,4258  | 0,49784913 | 0,07596297 | 0,09913303 |
| Q23715 | AT2G27020.1 | 2  | AVDNSGTVVQK, VPDDILEAK                                                             | proteasome subunit alpha type-3                                     | 0,95457 | 1,4616  | 1,5311  | 0,39554166 | 0,06806654 | 0,07417003 |
| Q81148 | AT3G22110.1 | 5  | AAAVGANNQAAQSLK, IDDHVACAVAGIMSDANLINTAR, HGVTQPAETS, LELAEVYLTSPK, LYQVYEM        | proteasome subunit alpha type-4                                     | 1,0556  | 1,3438  | 1,3436  | 0,36319769 | 0,04134429 | 0,04504245 |
| Q81149 | AT1G53850.2 | 2  | DLSQLEAETIIVSLK                                                                    | proteasome subunit alpha type-5-A                                   | 0,98335 | 2,0401  | 2,0746  | 0,45803923 | 0,01401529 | 0,02245578 |
| Q42134 | AT3G14290.1 | 2  | DITLQEAETIIVSLK                                                                    | proteasome subunit alpha type-5-B                                   | 0,96939 | 1,86    | 1,9187  | 0,4256023  | 0,02080735 | 0,03067041 |
| P30186 | AT3G51260.1 | 2  | IPALYQDTPSGTFSAWK, LTLEDVPTVEYTR                                                   | proteasome subunit alpha type-7-A                                   | 0,80405 | 1,2031  | 1,4963  | 0,18463535 | 0,17718645 | 0,09793905 |
| P42742 | AT3G60820.3 | 4  | HLVYQHNNK, GCVFTYDAVGSYER, QDSNTPLESAEAVDLVK, AVLSSSFGQADVK                        | proteasome subunit beta type-1                                      | 0,87389 | 1,6521  | 1,8905  | 0,26346102 | 0,03625266 | 0,03184562 |
| Q9X005 | AT1G21720.1 | 1  | VFGLSGLATDVQTLTYQR                                                                 | proteasome subunit beta type-3-A                                    | 0,96396 | 2,0878  | 2,1659  | 0,41535462 | 0,01255961 | 0,01957823 |
| Q7DLR9 | AT1G56450.1 | 1  | FNPLWNTLVLLGVK                                                                     | proteasome subunit beta type-4                                      | 1,2064  | 1,4233  | 1,2583  | 0,35640931 | 0,03565511 | 0,07150049 |
| Q2V3D4 | AT4G31300.2 | 2  | SGBAADSQVSDYR, ITQLTDNVVYCR                                                        | proteasome subunit beta type-6                                      | 0,89682 | 1,6903  | 1,8848  | 0,29871937 | 0,03209287 | 0,03184562 |
| Q04379 | AT1G48410.1 | 5  | QSDAPQALQVLDVLR, SGNLPGTVVDSK, ELLIAR, LFAQNHNDR                                   | protein argonaute                                                   | 0,62404 | 1,4771  | 2,367   | 0,06454334 | 0,06380264 | 0,01398742 |
| Q9FZ33 | AT1G54990.1 | 1  | SGLADYSIEFVSLPK                                                                    | protein auxin RESPONSE 4                                            | 0,64132 | 1,8659  | 2,9095  | 0,07413148 | 0,02063113 | 0,00617974 |
| Q8LD57 | AT1G48440.1 | 1  | LSCSSEVCTATER                                                                      | protein B-cell receptor-associated 31-like protein                  | 0,96635 | 1,3503  | 1,4425  | 0,44298898 | 0,09935711 | 0,13380921 |
| Q65605 | AT4G25570.1 | 1  | GLLAWEATNK                                                                         | cytochrome b5(1)/ferric reductase transmembrane family prote        | 0,53011 | 0,46257 | 0,8726  | 0,03733465 | 0,01107518 | 0,25387857 |
| Q95RG3 | AT1G77510.1 | 2  | LKPFDELFDVSK, LDATANIPDSPTFDVK                                                     | protein disulfide-isomerase 2                                       | 1,4718  | 1,7668  | 1,2004  | 0,09614373 | 0,02599306 | 0,20402169 |
| Q9X01  | AT1G21750.1 | 5  | VVSDSLDDVLSNGK, FDFDGALEK, IDASEETNR, VVVVGFPK, AASALSNNVPPVVLAK                   | protein disulfide-isomerase A1                                      | 1,4007  | 1,7938  | 1,3282  | 0,172787   | 0,0325878  | 0,12929979 |
| Q48773 | AT2G32920.2 | 2  | VQGFPTLVFGPK, GVATVAADADAHQSAADQYGIK, SAFELQHLLEFK                                 | protein disulfide-isomerase A6                                      | 1,4667  | 1,7661  | 1,254   | 0,16916149 | 0,03089351 | 0,12730146 |
| Q22263 | AT2G47470.1 | 2  | DLDDVDFINEK, AGIVESDALVK                                                           | protein disulfide-isomerase A6                                      | 1,2272  | 1,3086  | 1,2173  | 0,35896271 | 0,         |            |

|        |             |    |                                                                                 |                                                               |         |         |         |            |            |            |
|--------|-------------|----|---------------------------------------------------------------------------------|---------------------------------------------------------------|---------|---------|---------|------------|------------|------------|
| Q95F2  | AT3G46780.1 | 8  | IASLVADIFANTVAENK,VYADAIAR,EAEASLAEDAQQK,VAQTDVAYTLK,AGVPLDGAQDLAR,ADAV         | protein plastid transcriptionally active 16                   | 1,5029  | 1,0442  | 0,68641 | 0,09614373 | 0,44412679 | 0,07873399 |
| Q95L0  | AT2G05620.1 | 1  | GLFAPLVVTR                                                                      | protein PROTON GRADIENT REGULATION 5                          | 1,0812  | 1,9951  | 1,8245  | 0,33689661 | 0,01758657 | 0,03801615 |
| Q65449 | AT4G22010.1 | 7  | IPVPFSPDGDVLLAGDWDYK,NSWQDQVGVTTCPPIPK,ITYDGIPLGVK,GWGGNTFTVQPK,STVQV           | protein SKU5 similar 4                                        | 0,93096 | 0,97611 | 1,0485  | 0,35559811 | 0,4310875  | 0,39383438 |
| Q95K70 | AT2G20890.1 | 5  | RPIPSYNTVQLQELVQQLHML,LELASADPTVLDK,AVYALNEDPK,LCASLNINIK,SQTSASLVDFSSK,FFAV    | protein THYLAKOID FORMATION 1                                 | 1,1116  | 1,1466  | 1,0484  | 0,33467429 | 0,20427284 | 0,34337213 |
| Q95TE8 | AT3G46740.1 | 4  | LGNVVNGTQPVVTR,TGGSSYVAGVYK,TVFQVQDQGLGIGSK,EVVCEVVEGDITLQVQFQDK,LLPSSGGIS;     | protein TOC75-3                                               | 1,272   | 2,0166  | 1,3312  | 0,10113346 | 0,02204311 | 0,15800466 |
| Q9LIC2 | AT3G13772.1 | 1  | NLIQNGTVPQVEEQEK                                                                | protein transmembrane nine 7                                  | 0,66069 | 0,7555  | 1,1435  | 0,08384724 | 0,11094188 | 0,25679238 |
| Q7X659 | AT2G17790.1 | 4  | VEALFELIK,GVPQITVESVLEIK,QAQVTLQQLIGTLQR                                        | protein VPS3A                                                 | 0,9276  | 1,6821  | 1,8134  | 0,34845914 | 0,0325878  | 0,03633101 |
| B9DG36 | AT4G27440.2 | 2  | TEPTLDVLVNAAYVFPYAK,QFVDFNR                                                     | protochlorophyllide reductase B                               | 1,2128  | 0,88152 | 0,76615 | 0,21721359 | 0,12693655 | 0,07196314 |
| Q2V4R1 | AT1G03630.2 | 3  | LAQVVSVDPSLKG,YHEETGVTFASLYPGCIATGFLR,QFVFNFR                                   | protochlorophyllide reductase C                               | 1,0467  | 0,81546 | 0,78201 | 0,47275753 | 0,1290002  | 0,15691705 |
| O23144 | AT4G27500.1 | 4  | EFPVSPAPKDATVAQTEK,SELFDLDPK,FIISLWCK,EEKPVDAATAK                               | protein pump interactor 1                                     | 0,87478 | 1,5529  | 1,66    | 0,34264664 | 0,05546255 | 0,0555293  |
| Q5M730 | AT4G01690.1 | 9  | TECLIDGELK,SSLTSSYGEFLGGNYVAGVALGR,LTDLFFDMLSIGSK,SEGELVEAVDR,HPDAAPNLVTE       | protoporphyrinogen oxidase                                    | 1,6785  | 1,1753  | 1,6601  | 0,03241734 | 0,14624026 | 0,06483986 |
| Q8591  | AT5G14220.1 | 5  | FQILLEPFLWK,GLNVTVFEADGR,VSDASAEESVFEFFQR,RLPELGGVLPISK,VAVVAGVSLGAAYAK         | protoporphyrinogen oxidase                                    | 1,2396  | 1,6328  | 1,3171  | 0,18621086 | 0,03847704 | 0,13576487 |
| O22826 | AT2G43770.1 | 1  | IFTGGVDNDVK                                                                     | Prp8 binding protein                                          | 0,82938 | 0,94282 | 1,1368  | 0,21184587 | 0,35149375 | 0,26287732 |
| P82538 | AT3G55330.1 | 1  | TTLIDASEHDVQK                                                                   | PsbP-like protein 1                                           | 1,3038  | 1,7627  | 1,3519  | 0,1497995  | 0,02619155 | 0,12396969 |
| Q8LCR7 |             | 6  | WLAYGEINGR,FAMLGAAGAIAPEILK,GLAGSNGPAYPGPFNFPLGFK,LQDWNYPGSMGK                  | PSI type III chlorophyll a/b-binding protein, putative        | 1,2725  | 0,86005 | 0,68607 | 0,19991482 | 0,27006484 | 0,12117762 |
| Q9C508 | AT1G57990.1 | 6  | EDSDQDLQYR,IGTLIATVVALGSGVYFYLHK                                                | purine permease 18                                            | 0,62772 | 1,0844  | 1,6182  | 0,0390965  | 0,16249493 | 0,07791112 |
| O04309 | AT3G16470.2 | 20 | IVGFGQAGEVLYK,VYVGGQDGSVGVVYK,QTLLGTEFVVPDVEDYTSVK,LFSPGIEITVALFK,TSIPYLEGG     | myrosinase-binding-like protein                               | 0,62001 | 0,34403 | 0,56779 | 0,0374089  | 0,00536658 | 0,12730146 |
| Q9LM10 | AT1G06410.1 | 1  | AVLVQVNPAPR                                                                     | putative alpha,alpha-trehalose-phosphate synthase [UDP-formin | 0,77639 | 0,7474  | 0,96265 | 0,15784004 | 0,10533992 | 0,14363758 |
| Q9CAE1 |             | 3  | EPTFFIVPVVGLDSSGK,SSSLAR                                                        | putative aminopeptidase                                       | 1,1347  | 1,4757  | 1,2352  | 0,21841032 | 0,06404894 | 0,17651228 |
| Q940V0 | AT2G04350.2 | 2  | HSEFELCEK,MLWLDALVFK,LLSEPWTFESGLVTAALK                                         | putative AMP-binding protein                                  | 1,7513  | 2,7195  | 1,5529  | 0,04581505 | 0          | 0          |
| Q8GX78 | AT4G00370.1 | 1  | LGFLFLLVYR                                                                      | putative anion transporter 2                                  | 1,0768  | 2,4774  | 2,1702  | 0,40270994 | 0,01057178 | 0,02145069 |
| Q39196 | AT4G00430.1 | 1  | EPPAPLPERFEGELSSVSYFR                                                           | putative aquaporin PIP1-4                                     | 0,71257 | 0,36079 | 0,50633 | 0,11568153 | 0,00335257 | 0,02747498 |
| Q8LA66 | AT4G23400.1 | 1  | QPIGTAQTESK                                                                     | putative aquaporin PIP1-5                                     | 1,4983  | 0,91448 | 0,6729  | 0,10293836 | 0,11488251 | 0,03146056 |
| Q9FF53 | AT5G06060.1 | 1  | DLDVNESGPPAAR                                                                   | putative aquaporin PIP2-4                                     | 3,8444  | 0,47942 | 0,12471 | 0,00186276 | 0,01259507 | 1,58E-05   |
| Q9ZV07 | AT2G39010.1 | 2  | VFOQTYNRR,SFGAAVYNNQK                                                           | putative aquaporin PIP2-6                                     | 0,84169 | 0,76166 | 0,90374 | 0,22007147 | 0,10904609 | 0,29002757 |
| Q41975 | AT4G17340.1 | 1  | IEIGSGVDGFSVASLK                                                                | putative aquaporin TIP2-2                                     | 1,037   | 0,21366 | 0,19154 | 0,21696531 | 0,00085606 | 0,00046994 |
| Q3EBW9 | AT2G21870.2 | 4  | FQAAYDILR,EAARPTFK,ITLDEPDAAVK,AYLLK                                            | putative ATP synthase subunit                                 | 1,1798  | 1,6474  | 1,3963  | 0,22812793 | 0,03674982 | 0,10811884 |
| Q95I12 | AT2G21870.1 | 8  | FQAAYDILR,EAARPTFK,IEYENLLESMAYK,AYLLK,GLTDELGAEMFPALEK,AQLDELK,GVDFDIK,ADMFS   | putative ATP synthase subunit                                 | 1,0309  | 1,2885  | 1,2499  | 0,42619086 | 0,12620998 | 0,1671942  |
| Q9LUJ7 | AT3G22640.1 | 1  | EVLSTFNFPELLGR                                                                  | cupin family protein                                          | 0,53207 | 0,53538 | 1,0062  | 0,0374089  | 0,02063113 | 0,48434743 |
| Q95GZ5 | AT1G78060.1 | 8  | NNAVYHQGDSCVACNSAIDQVAIAK,AATSFPQVLTAAFSDFSEYVWRJ,GSIIWAGVPGEGAGIAEIFGDH        | putative beta-D-xylosidase 7                                  | 1,2227  | 1,2397  | 1,1217  | 0,11867247 | 0,32702643 | 0,14425372 |
| O49499 | AT4G34050.1 | 1  | EGPALVLDIEVADK                                                                  | putative coffeyol-CoA O-methyltransferase                     | 1,1474  | 1,5789  | 1,3761  | 0,26015474 | 0,04557805 | 0,11537043 |
| Q9LE22 | AT1G18210.2 | 1  | ISVLEGGVFK                                                                      | putative calcium-binding protein CML27                        | 1,3398  | 1,9306  | 1,3466  | 0,22851155 | 0,11310742 | 0,28589765 |
| Q9FYEA | AT5G04170.1 | 1  | EFTLAFVLSQNW                                                                    | putative calcium-binding protein CML50                        | 1,1293  | 1,0704  | 0,96962 | 0,42808857 | 0,3056281  | 0,37739022 |
| Q8LC80 |             | 2  | SGSLFDNVLICDDPDYAK,VYGLLEWQWK                                                   | putative calcium-binding protein, calreticulin                | 0,85289 | 1,1414  | 1,3383  | 0,23526536 | 0,23873136 | 0,12852101 |
| Q9CAV2 | AT3G11450.1 | 1  | FYNFVYAFK                                                                       | putative cell division related protein                        | 0,93921 | 1,4116  | 1,503   | 0,36922949 | 0,0801249  | 0,07866664 |
| O22842 | AT2G43610.1 | 1  | YCSPTTYPCQPK                                                                    | putative chitinase                                            | 0,3479  | 1,5321  | 4,4039  | 0,00649404 | 0,05301425 | 0,00054729 |
| P42734 | AT4G39330.1 | 2  | LIALGLPEKLEPMLPFLVGR,VTVSSSSTK                                                  | putative cinnamyl alcohol dehydrogenase 9                     | 0,91032 | 0,7759  | 0,85233 | 0,31825971 | 0,12620998 | 0,22896149 |
| Q8LB43 |             | 2  | EITGNEVALDLVQFLH                                                                | putative cytochrome P450 monooxygenase                        | 0,94052 | 1,2111  | 1,2877  | 0,37103852 | 0,17174434 | 0,14773663 |
| Q93X22 |             | 1  | EGSPVNLGEQIFLSIFNVVTR                                                           | putative cytochrome P450 protein                              | 0,96806 | 1,9486  | 2,0129  | 0,42303608 | 0,01738877 | 0,02532622 |
| Q8LF35 |             | 1  | SVFQQLVLR                                                                       | putative ER lumen protein retaining receptor                  | 0,79108 | 0,90842 | 1,1483  | 0,17206879 | 0,2878086  | 0,25169131 |
| Q95CY3 | AT4G39710.1 | 1  | FADGTFLDSSYK                                                                    | putative FKBP-type peptidyl-prolyl cis-trans isomerase 4      | 1,347   | 1,345   | 0,99854 | 0,13337707 | 0,10190205 | 0,49515082 |
| Q9LDY5 | AT1G18170.1 | 2  | GOVQGTGQVFDVTFGTK,IEVSEVANTR                                                    | putative FKBP-type peptidyl-prolyl cis-trans isomerase 5      | 0,68914 | 0,80887 | 1,1737  | 0,10169012 | 0,15438148 | 0,22896149 |
| Q9FJ62 | AT5G5480.1  | 3  | SAADFNGSYGISTVK,SIYWPISQYPLR,IVSDFSLDNDK                                        | putative glycerophosphoryl diester phosphodiesterase 1        | 0,43781 | 1,1378  | 2,5947  | 0,01692281 | 0,48801611 | 0,01568383 |
| Q95Z11 | AT6G5690.1  | 6  | TVLIDFISSEVFNFFK,LSVFPVAGSFTTQNVVEK,DGASGVPDGTDLAYK,SPWVTLTGDPLVPIAR,LFSLSE     | putative glycerophosphoryl diester phosphodiesterase 2        | 0,62028 | 1,0897  | 1,8187  | 0,06587546 | 0,2972604  | 0,08876987 |
| Q7Y208 | AT1G66970.1 | 1  | LISLQDLQAL                                                                      | putative glycerophosphoryl diester phosphodiesterase 3        | 0,57097 | 0,0341  | 1,811   | 0,04661118 | 0,40771676 | 0,03633011 |
| Q8H153 |             | 15 | TKPIAFVEYEFFTK,VWSYSLATSTAWDVTYFTAFNADTDGNDCR,CLGFFYNR,GLLGWDETK,VVNEG          | putative glycoprotein (EP1)                                   | 1,4235  | 1,1683  | 0,83255 | 0,05198642 | 0,0471138  | 0,34669332 |
| Q8H158 |             | 4  | FELIYMDVAIDEYAGLQK,APFDLFDTK,EGQNDIFYIGTSK,EDQLLEYLR,SGDELTSK,GIVDSEDLPLNI      | putative heat shock protein 81-2 (HSP81-2)                    | 0,85497 | 1,435   | 1,6487  | 0,15554632 | 0,29797719 | 0,10264234 |
| Q9M8R8 | AT3G02760.1 | 1  | AFSICQNVFK                                                                      | putative histidyl tRNA synthetase                             | 1,2879  | 1,7196  | 1,3352  | 0,15784004 | 0,02947581 | 0,12852101 |
| Q7FLV1 |             | 1  | GLPLSGSGSSAASAAAAAVNIEFGR                                                       | putative homoserine kinase HSK                                | 0,85262 | 0,92964 | 1,0903  | 0,23526536 | 0,32616632 | 0,32439444 |
| Q8GZ46 |             | 3  | STASQVIAK,VYGEATLSPEVK,QALPLVPLVLLLETLK                                         | putative importin beta                                        | 1,7266  | 1,367   | 0,85863 | 0,20358135 | 0,28416113 | 0,30818781 |
| Q9M8T0 | AT3G02880.1 | 9  | SSNILLDSYEAQ,VSDYGLAPHSISAPNRP,SPTHQQLNEEGVDPLR,ALLAVR,TPLNWETR,AGIALGAAR,LLI   | putative inactive receptor kinase                             | 1,2521  | 1,3645  | 1,0670  | 0,38893743 | 0,29170312 | 0,25156677 |
| COL74  | AT5G16590.1 | 1  | SIEAAPVPTSSAAVAK                                                                | putative inactive receptor kinase                             | 0,56514 | 0,85822 | 1,5186  | 0,04568662 | 0,21011354 | 0,07594912 |
| Q8W593 | AT1G67280.1 | 1  | SVFVNDIOLK                                                                      | putative lactoylglutathione lyase, chloroplast                | 1,3629  | 1,1219  | 0,82318 | 0,12801913 | 0,26200924 | 0,091671   |
| Q84WT1 |             | 2  | LGFENFSWYDAGSR,WADJLPGSVDIEPK                                                   | putative light-harvesting chlorophyll a/b binding protein     | 1,2543  | 1,2029  | 1,031   | 0,23630779 | 0,17644154 | 0,43346509 |
| Q4BN44 |             | 4  | NIWANDLAASLTLQSLGCVGK,SFDLLSLPK,ALGVETVPLVGPVSYLLSK                             | putative methionine synthase                                  | 0,91106 | 1,1425  | 1,2541  | 0,31991806 | 0,23746354 | 0,16437754 |
| B9DF17 | AT1G26850.2 | 4  | LVDHEDGLVPEK,AIQNWIQEYQDGR,ISSGSGVTVDAVEDDNR,GVPAVIGVLTGK,GVYTFSPWPK            | putative methyltransferase PMT2                               | 0,78137 | 1,1046  | 1,2662  | 0,311508   | 0,14609819 | 0,11447098 |
| Q6NPR7 | AT1G29470.2 | 2  | VLVDVCGGVASVFGYFLDR,TYDILLHADHFLSSK                                             | putative methyltransferase PMT24                              | 1,0502  | 1,3554  | 1,2907  | 0,39151124 | 0,09819711 | 0,14587407 |
| Q94D09 | AT1G04430.2 | 3  | TYDILLHAWISFSDIK,DGILLLELDR,LRPTGFVIR                                           | putative methyltransferase PMT8                               | 0,94878 | 0,81792 | 0,98983 | 0,43748202 | 0,3731268  | 0,4440009  |
| Q0WV76 |             | 22 | IPTAEALFAR,DAISAIGPIQDLPDYNK,IDAVIDASTVK,VLDSNVNQALDVLADILQNSK,TILGPAQNVK,VAINE | putative mitochondrial processing peptidase                   | 1,5346  | 1,5706  | 1,0775  | 0,48810215 | 0,12622377 | 0,1451596  |
| Q9ZU25 | AT1G51980.1 | 12 | AIELAAK,EQMSYTDALK,VAEPLTDLNPPVPPALPK,NPMMGLEIHAHAGSYGGLASPLVAPESALDR,LNGI      | putative mitochondrial-processing peptidase subunit alpha-1   | 0,84438 | 1,0418  | 1,2085  | 0,43640902 | 0,12251207 | 0,12974288 |
| Q84WD8 |             | 1  | FSFGESTSR                                                                       | putative Na+ dependent ileal bile acid transporter            | 1,3065  | 2,8675  | 2,1949  | 0,14877313 | 0,00296739 | 0,01900348 |
| Q95KC9 | AT2G02050.1 | 1  | QAEFLPWK                                                                        | putative NADH-ubiquinone oxidoreductase B18 subunit           | 0,78224 | 0,68452 | 0,87507 | 0,16337716 | 0,06809682 | 0,25750992 |
| Q8VX23 |             | 1  | LASGEVFGPDQPIALK                                                                | putative NADP-dependent malate dehydrogenase                  | 1,0348  | 1,1518  | 1,1131  | 0,42004279 | 0,22601448 | 0,29184272 |
| Q8LCA4 |             | 1  | GPTELDGGEDESSDFVR                                                               | putative non-green plastid inner envelope membrane protein    | 0,79691 | 1,2607  | 1,582   | 0,17725625 | 0,13893232 | 0,06464314 |
| Q9MAB3 | AT3G05060.1 | 1  | LDFSELADEADLK                                                                   | putative nucleolar protein 5-2                                | 1,6102  | 1,8211  | 1,131   | 0,06347689 | 0,0230881  | 0,27044118 |
| O65782 | AT4G31500.1 | 5  | ELFGQYQATYR,AADQSGTVLDSLELLSFTNCVCR,DTAAWGDGPNNEFPER,FDWSLPK,LAVISSAELAK        | cytochrome P450 83B1                                          | 1,879   | 2,4696  | 1,3144  | 0,0374089  | 0,00603337 | 0,13614308 |
| B9DH16 | AT3G14420.2 | 2  | DVQWLQITIK,NVVEQLVR                                                             | putative peroxisomal (S)-2-hydroxy-acid oxidase 2             | 0,85145 | 0,71007 | 0,83878 | 0,17452586 | 0,08050429 | 0,28320703 |
| Q8L9P5 |             | 1  | GSNVNTALETFLGAVAK                                                               | putative peroxisomal membrane carrier protein                 | 1,6519  | 3,5388  | 2,1423  | 0,05861778 | 0,0012406  | 0,02006469 |
| Q9ZVA2 | AT1G78830.1 | 7  | GMCMACPTPK,FVWQSFDPHTDITLQGSQK,GVTGFQILPNGNIVLHDK,CLLAPLGLTIK,VVNEGEGFYI        | curculin-like (mannose-binding) lectin-like protein           | 1,9959  | 1,5256  | 0,77395 | 0,0377867  | 0,0307626  | 0,31160325 |
| Q9FDY5 |             | 2  | VNYANISNTNYALDEVEEVA,DSPAAAAADGATATPKPPPIGPK                                    | putative photosystem 1 subunit PSI-E                          | 0,89089 | 0,87828 | 1,0761  | 0,09943575 | 0,11664798 | 0,2908149  |
| O81439 | AT4G04020.1 | 3  | AIESVETTER,AEISELTQLESK,VFASSTVSVDVK,SLADSLVGTDR                                | putative plastid-lipid-associated protein 1                   | 1,3289  | 1,1587  | 0,88793 | 0,22666054 | 0,23873136 | 0,42006128 |
| Q8LAP6 | AT1G51110.1 | 7  | VLEGLGIQNPDSLDIEGR,GDFNIHFVHIR,FSDFGELK,LIDALGIIQGR,GWLLTTLSPSGLNR,TTFTGVDFV    | putative plastid-lipid-associated protein 2                   | 1,1214  | 1,2735  | 1,1542  | 0,16588096 | 0,08496008 | 0,31633523 |
| O49629 | AT4G22440.1 | 3  | GLSASSETR,FAGPLGTNSITNAK,IIDLNPRA,IEIGDILTQLESK                                 | putative plastid-lipid-associated protein 2                   | 1,2671  | 2,0444  | 1,5418  | 0,36165493 | 0,1854632  | 0,15355836 |
| O82291 | AT2G35490.1 | 4  | DGGGLFVLAR,QSLNPLQDVAANISR,CLADSVYGTLEQK,GSWLLTYLTKD                            | putative plastid-lipid-associated protein 3                   | 1,035   | 1,1398  | 1,1169  | 0,41647555 | 0,4091523  | 0,35548218 |
| Q9LU85 | AT3G26070.1 | 3  | ILGFPIK,GNLFIK,SITNYQSNVINDTK,GATASDDQLR,QELLEAIIE                              |                                                               |         |         |         |            |            |            |

|         |             |    |                                                                                 |                                                              |         |         |         |            |            |            |
|---------|-------------|----|---------------------------------------------------------------------------------|--------------------------------------------------------------|---------|---------|---------|------------|------------|------------|
| Q9LY69  |             | 1  | IPGVISASSFDGK,TLVLALATGNK                                                       | putative protein                                             | 0,97844 | 1,0392  | 1,026   | 0,44539078 | 0,19026959 | 0,23990571 |
| Q9M126  |             | 1  | AAVIAIDLRL                                                                      | putative protein                                             | 0,94379 | 0,93196 | 0,98747 | 0,37591169 | 0,32903377 | 0,46793219 |
| Q9SVF0  |             | 8  | IEQLILATVDPK,FFDTHLSPFYR,APSIYVDENILLFFDQIK,IQSLCPTSGVACCTEQFDTLR,VLNCPYASPS    | putative protein                                             | 0,91142 | 1,0543  | 1,1379  | 0,37451204 | 0,26260914 | 0,21358058 |
| Q9LEV5  |             | 1  | HEYEGWSEK                                                                       | putative protein                                             | 0,83098 | 0,82611 | 0,99414 | 0,21322366 | 0,17190195 | 0,48516499 |
| Q68117  |             | 1  | LIAQNVPTSTPEDIR                                                                 | putative protein                                             | 0,704   | 0,53403 | 0,75856 | 0,11049341 | 0,02052223 | 0,13546214 |
| Q9SVV4  | AT4G18070.4 | 2  | ATEIAAEVALAFDEIR                                                                | putative protein                                             | 0,59897 | 0,20811 | 0,34745 | 0,05507078 | 0,0003044  | 0,00626206 |
| Q9SU20  |             | 1  | ELVQVMILDNLPALR                                                                 | putative protein (fragment)                                  | 1,0123  | 1,3181  | 1,3021  | 0,46816001 | 0,11310742 | 0,14186479 |
| Q8L807  |             | 5  | VILASNR,ASELGFQF,GGQGSYPI,IEVDNVRV,FSGNFVLLGQWK,GAEEGAVIALFHMLTK,GTVM           | putative protein transport protein SEC61 alpha subunit       | 1,3211  | 1,8715  | 1,3545  | 0,14602554 | 0,04919945 | 0,12736322 |
| Q0WNI9  | AT1G20950.1 | 1  | LTIFDIK                                                                         | putative pyrophosphate-dependent phosphofructokinase alpha   | 1,1188  | 0,90123 | 0,80556 | 0,29525989 | 0,27632132 | 0,17307293 |
| Q9SV22  |             | 2  | ISTQLSPWVSALFELPPFK,STLLGLFGSGEFLAQK                                            | putative pyrophosphate-dependent phosphofructokinase alpha   | 0,65401 | 0,87798 | 1,3425  | 0,08067319 | 0,24097596 | 0,12730146 |
| Q9SV68  | AT4G13010.1 | 11 | AENLEFMVNLVK,TEPGAALK,RPOEVEGAAEAASRAVGLTALQALTNPAGLK,LANAHVTATCGAR,SNEVCI      | putative quinone-oxidoreductase-like protein                 | 0,92451 | 0,91783 | 1,0084  | 0,32416414 | 0,37834936 | 0,40289158 |
| Q9AST9  | AT1G73110.1 | 1  | IPILIGWGGK                                                                      | putative Rubisco activase 2                                  | 0,78087 | 0,54527 | 0,69828 | 0,16227175 | 0,02220782 | 0,09745137 |
| Q8LA30  |             | 3  | FFSLPGEVILASLDGFNK,IVQGENVVAVLASVDEIQWPLTK                                      | putative senescence-associated protein 12                    | 0,71394 | 0,50934 | 0,71342 | 0,1162738  | 0,01662694 | 0,10708804 |
| Q8LC49  |             | 2  | VPAGEETELLVGLK,VGVMGIR                                                          | putative signal sequence receptor, alpha subunit (SSR-alpha) | 0,98202 | 1,8132  | 1,8464  | 0,45471935 | 0,02346718 | 0,03423451 |
| Q9FMF9  | AT5G64270.1 | 2  | AIGPQDVLATLLNNLK                                                                | putative splicing factor                                     | 0,79124 | 1,0946  | 1,3834  | 0,17210361 | 0,29702913 | 0,113176   |
| Q8LAP5  |             | 5  | FDMVMPKGYEVEIK,LQLTAPVCTSK,IDLQENVAIQHEAIQK,NFVSPNMIIVIR                        | putative translation initiation factor eIF-2, gamma subunit  | 0,92872 | 1,275   | 1,3488  | 0,29409355 | 0,37834936 | 0,22896149 |
| Q9C6M1  | AT1G25520.1 | 1  | AFLTQFFSPIFK                                                                    | putative transmembrane protein                               | 1,2077  | 3,1289  | 2,4889  | 0,45449884 | 0,00639157 | 0,01398742 |
| Q9VU1   | AT1G20960.2 | 1  | QLQGGDPSVNSGADEILAVLK                                                           | putative U5 small nuclear ribonucleoprotein helicase         | 1,2227  | 1,1987  | 0,98035 | 0,19877653 | 0,18057928 | 0,45058148 |
| Q9FVU8  |             | 1  | ILFDLVIFLSEK                                                                    | putative UDP-glucose:glycoprotein glucosyltransferase        | 1,6317  | 1,7893  | 1,0966  | 0,06099168 | 0,02478731 | 0,31472334 |
| Q9SV93  | AT3G16430.2 | 5  | YTFQYQWLIEEFPK,VSMIAIYNVNGICTPK,AVIVSVVTQEAQ,NHDGYAVEGDR,YYYLVGVQTER            | puric acid phosphatase 10                                    | 1,8662  | 1,7018  | 0,91191 | 0,03827781 | 0,03089351 | 0,31472334 |
| Q9M9P3  | AT3G03250.1 | 3  | LDLFLSQGK,MTTPVSDQVAETK,ASSDLLVOSDYLVDGVFTR,IQTDFEIVPEYK                        | putative UTP-glucose-1-phosphate uridylyltransferase 2       | 0,95865 | 0,9227  | 1,0847  | 0,13472514 | 0,47382238 | 0,131393   |
| Q04314  | AT3G16420.3 | 17 | VYVYQQAQDGISAVK,NGQPFEQALR,VLADPAPVNHVDEHLVSEVGGYSPFEGIQIK,TSVDIGSDEGHTFL       | PKY10-binding protein 1                                      | 1,1052  | 1,1163  | 1,0981  | 0,475579   | 0,24939841 | 0,28192356 |
| Q5G2N6  | AT1G78920.2 | 1  | TAQEVNEVR                                                                       | pyrophosphate-energized membrane proton pump 2               | 1,1024  | 1,2487  | 1,1328  | 0,3146579  | 0,14609819 | 0,26833844 |
| F31414  | AT1G15690.1 | 19 | FGAIGSAALVSLAELGFAVSR,YIEAGVSEHAK,AFIVAFR,AAVIGDTIGDPLK,IATYANAR,AADVGADLVGK,LI | Pyrophosphate-energized vacuolar membrane proton pump 1      | 1,0425  | 1,2889  | 1,2595  | 0,39110214 | 0,29401129 | 0,40324673 |
| Q9L782  | AT5G49810.1 | 1  | IPFLVALSVLK                                                                     | methionine S-methyltransferase                               | 0,53697 | 0,55263 | 1,0292  | 0,0385024  | 0,02357655 | 0,43301638 |
| P52901  | AT1G59900.1 | 1  | SVESSEQLLDFRR,LVLSHDLATEK                                                       | pyruvate dehydrogenase complex E1 alpha subunit              | 1,2709  | 1,6395  | 1,1738  | 0,16337716 | 0,11819001 | 0,44580635 |
| Q8H1Y0  | AT1G24180.1 | 2  | SVETSEELAFFRR,EVDDAVAQAK                                                        | pyruvate dehydrogenase E1 component subunit alpha-2          | 1,1193  | 2,1203  | 1,7205  | 0,22012589 | 0,01651631 | 0,05407754 |
| Q38799  | AT5G0850.1  | 4  | VLAPYSADAR,SNYMSAGQINVPVYFR,LAEEGISAEVNLN,VFVMGEEVQYQYGAYK                      | pyruvate dehydrogenase E1 component subunit beta             | 1,6691  | 2,1658  | 1,3469  | 0,08330194 | 0,00693155 | 0,0680739  |
| Q9C8P0  | AT1G34430.1 | 3  | NQMQRVNTADHR,HPVNVSSCR,MMVSELVGVPFR                                             | pyruvate dehydrogenase E2 component                          | 0,91246 | 1,803   | 1,976   | 0,32194046 | 0,02384151 | 0,02747498 |
| Q94KE3  | AT3G52990.1 | 1  | 1EMVEGLTHFDEILQEADEGIISR                                                        | pyruvate kinase                                              | 1,7218  | 3,9834  | 2,3135  | 0,04823352 | 0,00069591 | 0,01568383 |
| Q9FM97  | AT5G56350.1 | 1  | ATLIMVLTR                                                                       | pyruvate kinase                                              | 1,2377  | 1,303   | 1,0527  | 0,18736338 | 0,12035695 | 0,38489721 |
| Q22773  | AT4G02530.1 | 4  | WTLTGLLEQLK,VGQAIENNDLPAAGLVGLK,LSTPEENTEVEAFNSLASSLTVSNK,GYLDQLVVK             | chloroplast thylakoid lumen protein                          | 1,5287  | 2,0532  | 1,5361  | 0,0385024  | 0,01987707 | 0,46697019 |
| Q9FK25  | AT5G54160.1 | 3  | VILAECILPETPDSLSTK,VVCDAFVNIUILLK,SALELDLLEIMAK                                 | Quercetin 3-O-methyltransferase 1                            | 1,5236  | 1,7539  | 1,1511  | 0,08154038 | 0,02680505 | 0,24298794 |
| Q23207  | AT3G0250.1  | 3  | TATNTGGTTPAITTAAK,VPETLSQVEVQMK,DLEIPEITAEALTAADGFLGFPPTR,GGSPYAGVFAKDI         | Quinone reductase family protein                             | 1,3489  | 0,80495 | 0,62753 | 0,20006354 | 0,15804466 | 0,07873399 |
| Q24653  | AT3G59920.1 | 6  | FQGTSPYVPLVYGLGELPQAFAR,VIGVTSEGETAK,IVCDPSYLPNK,APHELGSAR,TLHTDVTK             | RAB GDP dissociation inhibitor 2                             | 0,93283 | 1,3726  | 1,4469  | 0,16254974 | 0,19286738 | 0,07633634 |
| Q9LXC0  | AT5G09550.1 | 1  | SPLMGLFEK                                                                       | RAB GDP-dissociation inhibitor                               | 1,3549  | 1,4567  | 1,0751  | 0,13062538 | 0,06898957 | 0,34841671 |
| Q9SEH3  | AT4G17530.1 | 1  | AFADELGPFLTSK                                                                   | RAB GTPase homolog 1C                                        | 1,6558  | 1,9329  | 1,1595  | 0,0563861  | 0,02365712 | 0,33079195 |
| Q9SN35  | AT4G18800.1 | 1  | HLVAVQTEDEK                                                                     | RAB GTPase homolog A1D                                       | 0,76889 | 1,4594  | 1,898   | 0,15102512 | 0,06833032 | 0,03158833 |
| Q049513 | AT4G18430.1 | 1  | AQLWDTAGQER                                                                     | RAB GTPase homolog A1E                                       | 1,0381  | 1,0251  | 1,0551  | 0,3767835  | 0,40744273 | 0,31708406 |
| P92963  | AT4G17170.1 | 1  | GAAGALLVYDTR,AVSTEEGEQFAK                                                       | RAB GTPase homolog B1C                                       | 0,92184 | 1,0189  | 1,1062  | 0,38846712 | 0,37107882 | 0,30218748 |
| Q9FK99  | AT5G39620.1 | 1  | ILLGDSDGVK                                                                      | RAB GTPase homolog G1                                        | 1,2063  | 0,92602 | 0,79045 | 0,21184587 | 0          | 0          |
| Q9X98   | AT1G49300.2 | 1  | GADCCVLVYDVNSAK                                                                 | RAB GTPase homolog G3E                                       | 1,0397  | 0,92602 | 0,99035 | 0,4105179  | 0,41683144 | 0,47551442 |
| Q04941  | AT5G03530.1 | 1  | ILLGDSDGVK                                                                      | RAB GTPase-C2A                                               | 1,2063  | 0,92602 | 0,76768 | 0,21184587 | 0,31921491 | 0,14159103 |
| Q9SF92  | AT3G09910.3 | 1  | ILLGDSDGVK                                                                      | RAB GTPase-like protein C2B                                  | 0,94281 | 0,74524 | 0,79045 | 0,37451204 | 0,10345363 | 0,15788845 |
| Q9LS94  | AT3G18820.1 | 1  | VGTVNEEAFQCIK                                                                   | Ras-related protein Rab-7A                                   | 0,98337 | 0,83991 | 0,91627 | 0,16254974 | 0,1662079  | 0,39109031 |
| Q9JF1   | AT5G59840.1 | 1  | NIEQHASNVDNK                                                                    | Ras-related protein Rab-8A                                   | 1,5416  | 1,0158  | 0,65888 | 0,07772994 | 0,45436924 | 0,07599149 |
| Q9FK68  | AT5G45750.1 | 1  | HLVAVQTEDEK                                                                     | Ras-related protein RABA1c                                   | 0,77083 | 0,91022 | 1,1808  | 0,15282694 | 0,29114832 | 0,22201574 |
| Q04486  | AT1G09630.1 | 1  | EGQTDVAATESSNK                                                                  | Ras-related protein RABA2a                                   | 0,72685 | 1,0768  | 1,4815  | 0,12230158 | 0,32406999 | 0,08303118 |
| Q9C426  | AT1G48630.1 | 2  | NTLAGHSGLYNTVAVSPDGLSCASGGK,LWDLATGESTR                                         | receptor for activated C kinase 1B                           | 0,90267 | 2,4132  | 2,6734  | 0,30758306 | 0,00646224 | 0,00844301 |
| Q9L428  | AT3G18130.1 | 3  | LWDLATGESTR,NSLVGHISGLYNTVAVSPDGLSCASGGK,AHTDVIATAITPIDNSDIIVTASR               | receptor for activated C kinase 1C                           | 0,937   | 1,9645  | 2,0965  | 0,36464091 | 0,01652694 | 0,02145069 |
| Q8N368  | AT4G18760.1 | 3  | LPDLSHFTAVSFLR,NTSGDIPDSDGDLISLK,GSPTSTLNSLK                                    | receptor like protein S1                                     | 0,54272 | 0,67344 | 0,80589 | 0,09254201 | 0,02168291 | 0,17307293 |
| Q9SC24  | AT3G51550.1 | 2  | YPTGTPYVAVPVDYSTAR,LNVNGNDISPADTGLR                                             | receptor-like protein kinase FERONIA                         | 0,89684 | 0,92632 | 1,0691  | 0,30758306 | 0,38074277 | 0,3738053  |
| Q9S585  | AT1G53750.1 | 1  | FDDGVGGDEIVQR                                                                   | regulatory particle triple-A 1A                              | 1,332   | 1,7227  | 1,3239  | 0,14224503 | 0,074121   | 0,33358684 |
| Q9SE14  | AT5G58290.1 | 2  | ENAPAIRFIDEVDAIATAR,FDAQTGADR                                                   | regulatory particle triple-A ATPase 3                        | 0,77765 | 1,1501  | 1,5739  | 0,06856897 | 0,30054528 | 0,0445388  |
| Q80837  | AT2G45820.1 | 2  | VQVESPALPAK,EPTPAPVEVADEK,AAVEAQLR                                              | Remorin                                                      | 0,87358 | 0,70518 | 0,79596 | 0,41210417 | 0,14602234 | 0,20220305 |
| Q9M2D8  | AT3G61260.1 | 1  | AAVEAQLK                                                                        | remorin-like protein                                         | 1,0136  | 0,66867 | 0,65969 | 0,46504043 | 0,0599805  | 0,07633634 |
| B9DFM8  | AT4G20830.1 | 3  | ASVVVALFLGR,IGLVFNPYGGK,TLNLFK                                                  | Reticuline oxidase-like protein                              | 1,2952  | 1,2415  | 0,98508 | 0,17793438 | 0,15733402 | 0,45518062 |
| Q42586  | AT3G54470.1 | 1  | DOCTLIEVLTDSGASVLETAAPLR                                                        | ortidine 5'-phosphate decarboxylase                          | 0,53952 | 0,48343 | 0,89604 | 0,0390965  | 0,01319151 | 0,28820503 |
| Q9S579  | AT1G64090.1 | 2  | GAFAFIK,VDDFGEK                                                                 | reticulon-like protein B3                                    | 1,1232  | 1,0876  | 0,9683  | 0,28995258 | 0,30624202 | 0,42538439 |
| Q82352  | AT2G46170.1 | 1  | TSPQIPEHVPEAFVAVSSLR                                                            | reticulon-like protein B5                                    | 0,99621 | 1,2555  | 1,2603  | 0,49105726 | 0,14192721 | 0,16012956 |
| Q9S537  | AT3G0260.2  | 1  | GLLFLQDLACK,SADVLLWR                                                            | reticulon-like protein B8                                    | 1,0211  | 0,67591 | 0,63859 | 0,3847187  | 0,00639157 | 0,01568383 |
| Q39099  | AT2G06850.1 | 5  | TGQPAILQNTVFTGK,DLDAEQWR,GFHIDGQCSVAEK,WTYINYCTDR,IYLVWDFPSK,TNWANAPFVAS        | xyloglucan endotransglucosylase/hydrolase protein 4          | 0,53895 | 0,36719 | 0,68338 | 0,0390965  | 0,00558934 | 0,12344741 |
| Q8L819  | AT5G15650.1 | 4  | NLLCPSPPFFNTLYDPYR,GFVQEQEIFFQNAK,HPVPEVDELYNLR                                 | reversibly glycosylated polypeptide 2                        | 1,6532  | 1,8371  | 1,4138  | 0,49784913 | 0,013676   | 0,02369746 |
| Q0WV77  | AT4G24750.1 | 4  | LAGIGFSEFLGWTDQQR,GSTVWPFIFDNDLADGLSK,DSSELVACQK                                | rhodanese homology domain-containing protein                 | 1,0139  | 0,91297 | 0,90047 | 0,46447374 | 0,29610372 | 0,29405411 |
| Q8R72   | AT3G08920.1 | 2  | VSEGFDFEIEGTELR,LLNVLLPSGQK                                                     | rhodanese-like domain-containing protein                     | 1,3844  | 2,0322  | 1,468   | 0,11940032 | 0,01421162 | 0,08601586 |
| Q048529 | AT2G42220.1 | 4  | TVNHNFSGLFFGPFPTK,SCSHPLFVNEEDNDIGTIK,LLVLCQEGLR,LEEAQYENIACVTSGLQKVPKFTFESV    | rhodanese-like domain-containing protein                     | 1,2632  | 2,0261  | 1,5333  | 0,28995258 | 0,05630528 | 0,12540988 |
| Q9T092  | AT4G27700.1 | 5  | NVHFLEGGIYTWGK,IIVACSSAGTMKPTQNLPEGQSR,SLIAAYLLVNGYK,EWTAWDIAR,ENNFDLDFV        | rhodanese-like domain-containing protein                     | 1,0497  | 1,6961  | 1,6721  | 0,25128951 | 0,07495033 | 0,17416837 |
| Q9SF3X  | AT1G76400.1 | 5  | FLGNLAYSVPASEGK,GDTLLEVAFTNLVLPFPEK,FTFTYGLPLTDFLASEGK,VVNSGSESEFAL             | Ribophorin I                                                 | 1,1     | 1,6413  | 1,5565  | 0,33667925 | 0,12530114 | 0,10726668 |
| Q9ZUA0  | AT2G01720.1 | 5  | NLAMVQALATGK,TYLPDVKPTEQPDAPNDGYVR,VESTSIIEPANR,YSYLDVGR,AFLTK                  | Ribophorin I                                                 | 0,84223 | 1,3114  | 1,579   | 0,39394212 | 0,09077271 | 0,09313267 |
| Q93216  | AT4G21150.3 | 16 | VLQSSSTLK,GLTSAASESTGLNLPDQK,VVITEAQTK,SVDAOSQPISTASVIR,VPIAATGAIENIEAIVLDS     | ribophorin II (RPN2) family protein                          | 1,0197  | 1,1784  | 1,1296  | 0,33467429 | 0,04259255 | 0,08383041 |
| Q680A5  | AT2G42910.1 | 3  | FYFADQVLPFETGIPLTK,VIWAFDDGAWK                                                  | ribose-phosphate pyrophosphokinase 4                         | 0,71271 | 1,4911  | 2,0922  | 0,11568153 | 0,06091412 | 0,02145069 |
| Q8RW74  | AT2G42710.1 | 1  | AAGADVGGLELIEELK                                                                | ribosomal protein .L1/L10 family protein                     | 1,6141  | 3,269   | 2,5137  | 0,14408762 | 0,00185623 | 0,01197314 |
| P56791  | ATC001310.1 | 2  | IVTIEYDNNR,GAIGDTIVSGTEVPIK                                                     | ribosomal protein L2                                         | 0,81698 | 0,5466  | 0,69761 | 0,10815991 | 0,01895266 | 0,12993994 |
| P56796  | ATC000640.1 | 1  | HTHGEIK                                                                         | ribosomal protein L33                                        | 0,86486 | 1,1429  | 1,3214  | 0,24982453 | 0,23718685 | 0,13380921 |
| P56802  | ATC000750.1 | 1  | SGILLSFVR                                                                       | ribosomal protein S11                                        | 0,84696 | 0,44429 | 0,52457 | 0,22760233 | 0,00931231 | 0,03104402 |
| P56807  | ATC000650.1 | 1  | LISLPLFNQK                                                                      | ribosomal protein S18                                        | 1,1522  | 1,1137  | 0,966   |            |            |            |

|        |             |    |                                                                               |                                                                  |         |         |         |            |            |            |
|--------|-------------|----|-------------------------------------------------------------------------------|------------------------------------------------------------------|---------|---------|---------|------------|------------|------------|
| O03042 | ATCG0490.1  | 28 | DTDILAAFR,GGDLFTK,TFQGGPHGIQVER,ALAALR,DDENVNSQPFMR,LEDR,SOAETGEIK,DNGLLHHI   | ribulose 1,5-bisphosphate carboxylase/oxygenase large subunit    | 0,74014 | 0,51193 | 0,70294 | 0,18917409 | 0,03089351 | 0,11455509 |
| Q9C917 | AT1G71500.1 | 9  | AAVIGFLLLDPELLTGLK,AQPLGTATNVVDEVR,GTGFLDFLYSADAFK,LTQDGCVCVSTDFDLR,VVIC      | Rieske (2Fe-2S) domain-containing protein                        | 1,1859  | 0,94685 | 0,79704 | 0,30148919 | 0,20850578 | 0,14369822 |
| Q32909 |             | 2  | VYVGNLPWVDVNGR,LEQLFSEHGK,AEFFPESEAK                                          | RNA binding protein                                              | 1,397   | 0,89128 | 0,65074 | 0,1681456  | 0,2595879  | 0,09816721 |
| Q9SA52 | AT1G09340.1 | 18 | QLPQSDQDFADFSK,SSLSAEFGVDVYDNGR,DPHLCHEEDAVDK,DLATAFLVNLGNEK,LETESLLQSK,      | RNA binding protein                                              | 0,77201 | 0,5659  | 0,70791 | 0,16588096 | 0,09223695 | 0,34555977 |
| Q2V4R5 | AT1G01080.2 | 1  | IAIASLDGTEVGGRR                                                               | RNA recognition motif-containing protein                         | 1,9754  | 1,2673  | 0,64157 | 0,03241734 | 0,1357703  | 0,06904298 |
| Q82299 | AT2G35410.1 | 2  | EEAENAIK,SPNDLPSPAGDTR                                                        | RNA-binding (RRM/RBD/RNP motifs) family protein                  | 1,0365  | 0,72589 | 0,76843 | 0,30758306 | 0,10935482 | 0,2064367  |
| PP3042 | AT4G31380.1 | 5  | ALDAGEGSSAK,STLLNHLFGTNR,GCCEAVEQAK,LLQLQPTFDQVGLHLR,NETEYTVQIAQAQENI         | Root hair defective 3 GTP-binding protein RHD3                   | 1,2862  | 1,5121  | 1,13741 | 0,18146812 | 0,17903664 | 0,24204577 |
| Q94878 | AT4G33010.1 | 7  | GNADVQNNVLN,GNINIEVR,LGVAEQLELPFDYK,ATSNICTAQALANMAAMYAVYHGAQGLK,IGISV        | glycine dehydrogenase [decarboxylating] 2                        | 0,44161 | 0,41375 | 0,87187 | 0,03918435 | 0,01851274 | 0,40957572 |
| Q93VH5 | AT5G10730.1 | 4  | FVYISAADFGLANYLLR,DALEGLTVSIVCGGFGSNGMYK,FAYGIIIRPGFVYGR,SSLOESWASR           | Rossmann-fold NAD(P)-binding domain-containing protein           | 1,6092  | 1,6517  | 1,0264  | 0,06347689 | 0,03625266 | 0,43816765 |
| Q8H0U5 | AT3G18890.1 | 7  | AGSLVQSVK,VNNFLVTLSTGNT,RPVYPPPK,VEVVAETTPATPIEK,LQNTDEGTQPVKE,EEDLVFVAGAT    | Rossmann-fold NAD(P)-binding domain-containing protein           | 1,434   | 1,4904  | 1,0442  | 0,0822534  | 0,05301688 | 0,48278577 |
| 065502 | AT4G3250.1  | 10 | YLDQVSNLK,AWTTQEVITLCELR,LLTFAFGR,ALDEGYDVR,LCGFMOGLGQVAVPIEEK,LTLLAR,FFQW    | Rossmann-fold NAD(P)-binding domain-containing protein           | 1,1492  | 1,2619  | 1,1176  | 0,17677818 | 0,3081625  | 0,24275995 |
| Q8L9T6 | AT4G23430.2 | 3  | YFNYPVAVAVGAVAK,LCNVLHANELTK                                                  | Rossmann-fold NAD(P)-binding domain-containing protein           | 1,0398  | 0,89031 | 0,85624 | 0,4105179  | 0,26037722 | 0,23398863 |
| Q9S291 | AT4G09750.1 | 1  | TSEQGADTIVWLALQPK                                                             | Rossmann-fold NAD(P)-binding domain-containing protein           | 0,52416 | 0,76348 | 1,4566  | 0,03554246 | 0,1167307  | 0,08876987 |
| Q9F4E8 | AT5G52470.1 | 1  | ILALNASFLK                                                                    | rRNA 2'-O-methyltransferase fibrillarin 1                        | 0,44275 | 0,84577 | 1,9103  | 0,01870364 | 0,19494297 | 0,03075562 |
| Q94AH9 | AT4G25630.1 | 1  | ILALNASFLK                                                                    | rRNA 2'-O-methyltransferase fibrillarin 2                        | 0,84973 | 2,2301  | 2,936   | 0,37591169 | 0,00320596 | 0,00848737 |
| Q9FYF7 | AT1G67360.2 | 3  | FFVTVNSVK,AAFNYAATEYK,VEGAVTVVTPYQK                                           | Rubber elongation factor protein (REF)                           | 1,5781  | 4,4748  | 2,8356  | 0,07029693 | 0,00038756 | 0,00652833 |
| B9DF59 | AT1G55490.2 | 1  | ESTIVDGGSTQDAVK                                                               | RubisCO large subunit-binding protein subunit beta               | 1,4151  | 1,2593  | 0,89122 | 0,11609178 | 0,11310742 | 0,36785181 |
| Q9FFJ2 | AT5G11710.1 | 3  | QGGGVVITGVDDGGNAAK,SFDEQPDPTVCPQCIAPK,ATHICLDGCFYITLPK                        | rubredoxin family protein                                        | 1,7345  | 1,0391  | 0,5991  | 0,04768595 | 0,39518157 | 0,0510789  |
| Q9SL14 | AT1G54500.1 | 1  | AT1G54500.1                                                                   | rubredoxin-like protein                                          | 1,0066  | 1,083   | 1,0754  | 0,23365741 | 0,29797719 | 0,35067786 |
| Q94B20 | AT1G5450.1  | 3  | LGENSEFSQVINDAK,DVYLLNLPVYR,FSVYTAGTGGAPITLATSFLLEEVATYK                      | Saccharoglycine dehydrogenase                                    | 1,4881  | 1,4068  | 0,94538 | 0,09182467 | 0,08150801 | 0,37602812 |
| Q8LGI2 | AT5G39410.1 | 9  | GPSEEVESATK,SLALAGR,SFLGFR,IGNFNGTYESAVLGVANAIEK,LPSADAVVYR,GYSSELSAQGETKPE   | Saccharoglycine dehydrogenase                                    | 1,1753  | 1,3233  | 1,1342  | 0,28959084 | 0,12897321 | 0,25805658 |
| Q52738 | AT5G20350.1 | 1  | LLLLFDAYR                                                                     | S-acyltransferase TIP1                                           | 1,3228  | 2,2694  | 1,7156  | 0,14224503 | 0,00890638 | 0,04560558 |
| Q5D6C4 |             | 1  | TGQVDPDPTSDNPEFQVLSIK,TEFGSSQPK                                               | S-adenosyl-L-homocysteine hydrolase 1 mutant                     | 1,4778  | 1,0716  | 0,80728 | 0,49496207 | 0,43662031 | 0,45058148 |
| Q5D6C3 |             | 2  | LVGVSSEITTVGK,ALDWVGGGGPDLVDDGGDATLLHIEGVK                                    | S-adenosyl-L-homocysteine hydrolase 1 mutant                     | 0,80525 | 0,50562 | 0,6279  | 0,18561901 | 0,01634816 | 0,06300224 |
| Q9SLI8 | AT2G36880.2 | 2  | TQVTVYEV,SVAAGLAR                                                             | S-adenosylmethionine synthase 3                                  | 1,2616  | 1,333   | 1,0565  | 0,17297932 | 0,10735207 | 0,37789765 |
| Q9LUT2 | AT3G17390.1 | 2  | SIVASGLAR,ANNVDEYQVIR                                                         | S-adenosylmethionine synthase 4                                  | 1,146   | 1,2502  | 1,1106  | 0,3295906  | 0,15211344 | 0,26280471 |
| Q9SI32 | AT2G04940.1 | 1  | RPVASITDALGNELFR                                                              | scramblase-related protein                                       | 1,1469  | 1,9546  | 1,7042  | 0,26069976 | 0,01707463 | 0,04671641 |
| Q9SFU0 | AT3G07100.1 | 1  | FLPYGLAITK                                                                    | sec24-like transport protein                                     | 0,59414 | 0,7144  | 1,2024  | 0,0523846  | 0,08354731 | 0,20220305 |
| Q9LPS2 | AT1G01960.1 | 1  | APLVAAIQTLGNMGESLFC                                                           | SEC7-like guanine nucleotide exchange protein                    | 0,55477 | 0,78643 | 1,4176  | 0,04293598 | 0,13359262 | 0,10188027 |
| Q9M5P2 | AT1G61250.1 | 3  | LSPLPPEPVGFDYGR,YDNPFAFEEENVPFANAR,AGVIEVK                                    | secretory carrier-associated membrane protein 3                  | 0,94134 | 0,94413 | 1,003   | 0,3724232  | 0,35467868 | 0,4918964  |
| Q9LSE4 | AT3G26710.1 | 1  | QVAGEILSFTR                                                                   | cofactor assembly of complex C                                   | 1,8275  | 2,401   | 1,3138  | 0,04044006 | 0,00663084 | 0,13614308 |
| Q39218 | AT3G13110.1 | 1  | LSNLNLPSTLFDLFSGLQGNPDIVESVK                                                  | serine acetyltransferase 3                                       | 0,95348 | 1,5469  | 1,6224  | 0,3936627  | 0,05048437 | 0,05824542 |
| Q3E923 | AT5G26780.1 | 1  | LDENTGYIDYDQLEK                                                               | serine hydroxymethyltransferase 2                                | 2,9234  | 5,9935  | 2,0502  | 0,00641132 | 7,73E-05   | 0,02371304 |
| Q23254 | AT4G13930.1 | 1  | LLCGGSAYPR                                                                    | serine hydroxymethyltransferase 4                                | 0,84071 | 0,8585  | 1,0212  | 0,2218635  | 0,21044256 | 0,44849848 |
| Q94I88 | AT4G36480.2 | 1  | VVLFVGPVIR                                                                    | serine palmitoyltransferase                                      | 1,0997  | 1,3935  | 1,2672  | 0,31679829 | 0,08542725 | 0,15741367 |
| Q23601 |             | 3  | EPQGSTPAVK,NLFDETTLDYK,WINGTWDLK                                              | hypothetical protein                                             | 1,8203  | 1,6673  | 0,91593 | 0,04125134 | 0,03444005 | 0,32227833 |
| AL14Y1 | AT3G10350.1 | 1  | LLSLPDFLDSGK                                                                  | anion-transporting ATPase family protein                         | 0,5503  | 0,57398 | 1,043   | 0,04139894 | 0,02758077 | 0,40522368 |
| Q56YA5 | AT2G13360.2 | 10 | HHFLFVGPVNIPEVIR,YNLSLGLGLNK,LGTYVWYPTSIQLYGLR,VFFDWNVDYK,ALSPTGLGIVCASPK,I   | serine-glyoxylate aminotransferase                               | 0,62398 | 0,47993 | 0,71767 | 0,0507979  | 0,00692255 | 0,10726687 |
| Q39230 | AT5G27470.1 | 2  | LPQIVSIVSGALNDAAK,FASVVEDEIK                                                  | seryl-tRNA synthetase                                            | 1,1617  | 1,0799  | 0,92958 | 0,24294789 | 0,31921491 | 0,34755475 |
| P58684 | AT2G39660.1 | 1  | DGVLVEGLFWK                                                                   | signal peptidase complex subunit 2                               | 0,72145 | 0,70294 | 0,97434 | 0,11932159 | 0,077212   | 0,43816765 |
| Q9S5R2 | AT1G52600.1 | 1  | ENTGEVDVLTK                                                                   | signal peptidase, endoplasmic reticulum-type                     | 1,3786  | 1,4497  | 1,0516  | 0,12161525 | 0,07071045 | 0,38674952 |
| Q9C9C0 | AT1G73990.1 | 2  | NAWEIFVVK,FNSGLSLPQLSENFK                                                     | signal peptide peptidase                                         | 1,0009  | 1,7308  | 1,6694  | 0,28224382 | 0,01758657 | 0,04560558 |
| 065253 |             | 2  | IEALIQFIEQGASK,LNVLFTLSK                                                      | similar to aminoacyl-tRNA synthetases                            | 1,4792  | 1,4932  | 1,1028  | 0,18877558 | 0,08232493 | 0,26397186 |
| P93818 |             | 1  | YGLTPVELALGNVR                                                                | Similar to Babesia aldo-keto reductase [gb] M93122               | 1,0593  | 1,2916  | 1,2193  | 0,37599422 | 0,12530114 | 0,18838476 |
| 064796 |             | 1  | LPFDIPFISGK                                                                   | Similar to mannosyl-oligosaccharide glucosylase [gb] X87237 fror | 0,90237 | 1,3086  | 1,4502  | 0,30758306 | 0,11738917 | 0,09091872 |
| 004471 |             | 1  | LFLGIGPALR                                                                    | Similar to Saccharomyces hypothetical protein P9642.2 [gb] U4C   | 1,7783  | 2,7853  | 1,5347  | 0,06099168 | 0,00692025 | 0,08876987 |
| Q80977 | AT2G14740.2 | 1  | VCECFPTDVGQFK                                                                 | vacuolar-sorting receptor 3                                      | 0,55033 | 0,58601 | 1,0648  | 0,04139894 | 0,0307626  | 0,36629974 |
| Q9XIR5 |             | 1  | NPEISLVPITLALLTDNPEYTR,NPDTISQISDLSLPIQLVK,VLPIILPISK                         | similar to translational activator                               | 1,1819  | 2,0272  | 1,6786  | 0,17691773 | 0,00931231 | 0,03772105 |
| B3H5K3 | AT5G47690.3 | 1  | VVGLVGEFLSPGR,AGVDDLLGLK                                                      | sister chromatid cohesion protein PD55                           | 0,93942 | 1,499   | 1,4467  | 0,20343289 | 0,3686857  | 0,15277779 |
| Q93VC7 | AT5G30510.1 | 7  | FVVEVDEQTK,MFEDAYER,IAQEAAMAR,SSAYSVEQAEIHR,VSDIATVLQPGDGLK,GGLVALVEGLR,NIQ   | small subunit ribosomal protein S1                               | 1,3059  | 0,6868  | 0,53337 | 0,23819306 | 0,0631033  | 0,04475528 |
| Q42343 |             | 1  | TLEGLLLR                                                                      | SrRP                                                             | 0,5422  | 1,3284  | 2,4499  | 0,3090965  | 0,10946609 | 0,01225561 |
| Q1EBV7 | AT2G6900.1  | 1  | FSFGESTR                                                                      | Sodium bile acid symporter-like protein                          | 1,012   | 1,404   | 1,3873  | 0,46816001 | 0,08227413 | 0,11195408 |
| Q0WVZ5 | AT5G27150.1 | 1  | AAVFPFLSFLSNLAK                                                               | sodium/hydrogen exchanger 1                                      | 1,018   | 1,0652  | 1,0463  | 0,45504834 | 0,34358374 | 0,39884546 |
| Q8VZ90 | AT5G20140.1 | 2  | FCSHLDLWDSIK,NDYFSLSEGLVDVFK                                                  | SOLH heme-binding protein                                        | 1,4391  | 1,2927  | 0,98925 | 0,10545331 | 0,12502722 | 0,29173895 |
| Q9LVW0 | AT5G54100.1 | 2  | LASYGVENPVAVMQLAQTMTR                                                         | SPFH/Band 7/PHB domain-containing membrane-associated prc        | 2,557   | 23,724  | 9,2778  | 0,0106699  | 7,50E-09   | 6,88E-06   |
| Q9C944 |             | 1  | SVLLAPSEIVDVLVFSK                                                             | spore coat protein-like protein                                  | 0,88046 | 1,0888  | 1,2366  | 0,27394655 | 0,30531068 | 0,17553034 |
| P53799 | AT4G34640.1 | 2  | SFSLVQQLNTELR,YPDDIYPLK                                                       | Squalene synthase                                                | 1,3455  | 2,1026  | 1,5627  | 0,13337707 | 0,012231   | 0,06850123 |
| Q81814 |             | 2  | SLDITIISAEDLK,LTVDAAAAR                                                       | srC2-like protein                                                | 1,4558  | 2,7045  | 1,8577  | 0,10012196 | 0,00367439 | 0,03345105 |
| Q9S1U9 | AT4G23680.1 | 1  | VYDVYQFIPK                                                                    | SRPBC2 ligand-binding domain-containing protein                  | 1,4619  | 1,7054  | 1,1666  | 0,09906164 | 0,03084205 | 0,235489   |
| Q9S1U0 | AT4G23670.1 | 4  | SENHFVDAIGHQIINVVYHEGESHSGSIR,NDDFPEPSGYMK,VFDIYEFIPK,GLDGHVMEHLK             | SRPBC2 ligand-binding domain-containing protein                  | 0,86038 | 0,50683 | 0,73661 | 0,20302221 | 0,04281202 | 0,13576487 |
| PP4111 | AT1G74020.1 | 7  | FLDGLDVPDPTGVVYFSSSR,SGPEAFADFSTGK,AGSDEFSTVSNPNDK,IGSTGNFVWASVVK,ITDS        | strictosidine synthase 1                                         | 0,88292 | 1,606   | 2,0762  | 0,11399376 | 0,03097873 | 0,2004875  |
| Q9M1J6 | AT3G57020.1 | 5  | SFLTCESGTSLVHR,ISGETGEVLELLEDK,LWFGSIVYWPAAVWVLDL,TIPVVAAGPESIEFDPK,GEOPYAAVD | strictosidine synthase family protein                            | 0,83234 | 0,54962 | 0,66033 | 0,21404153 | 0,02317759 | 0,07653079 |
| Q9S0D7 | AT5G51420.1 | 3  | FLTGAEEFVIGLKNPEDIAHYK,DDGGHYVALISVEVWTK,LDTAVADNGVLYFTDASSK                  | strictosidine synthase-like 4 protein                            | 1,1048  | 0,51773 | 0,46862 | 0,3115008  | 0,01792803 | 0,02029096 |
| 004485 |             | 1  | SPLSVNEIYALPMLTILTK                                                           | Strong similarity to S. pombe leucyl-tRNA synthetase [gb] Z73101 | 1,0928  | 3,0926  | 2,83    | 0,32669256 | 0,00243954 | 0,00652833 |
| Q9ZUF6 | AT2G05920.1 | 6  | GVFVSCSAGNSGPTR,EVTNVGAASSVYK,GTVDLVKPTPVVAAFFSR,DVDGHGHTTSTAAGSARV,DAGGI     | Subtilase-like protein                                           | 1,426   | 2,0442  | 1,4289  | 0,11932159 | 0,02593261 | 0,15452291 |
| Q84W50 | AT1G01900.1 | 1  | DAQGHGHTASTAAGDIVPK                                                           | subtilase-like protein                                           | 0,87125 | 1,2038  | 1,3817  | 0,25973442 | 0,17661713 | 0,11381838 |
| P53492 | AT5G09810.1 | 1  | LAYVALDYEGLLETK                                                               | actin 7                                                          | 0,6687  | 0,3989  | 0,63127 | 0,04205447 | 0,00389786 | 0,08383041 |
| Q82663 | AT5G66760.1 | 12 | NSNGSLPTSTIR,TQETLEEGCLQIDK,HTLGVWEDEK,TGHALLHTLYGQAMK,AVIELENYGLPFSR,AGLPLQ  | succinate dehydrogenase [ubiquinone] flavoprotein subunit 1      | 1,5207  | 2,6216  | 1,8533  | 0,16029952 | 0,00603337 | 0,03052763 |
| Q9XF66 | AT5G52240.1 | 1  | SDDPAETVTK                                                                    | membrane steroid-binding protein 1                               | 0,55566 | 0,53678 | 0,96602 | 0,04306948 | 0,02067516 | 0,42018922 |
| Q8LAD2 | AT5G23250.1 | 1  | FFVDPTQTEGLVIGEIGTAEEDAALIK                                                   | Succinyl-CoA ligase [GDP-forming] subunit alpha-2                | 0,89004 | 1,1767  | 1,322   | 0,28995258 | 0,19996677 | 0,13377983 |
| Q82662 | AT2G20420.1 | 1  | AILVNFIGMVK                                                                   | Succinyl-CoA ligase [GDP-forming] subunit beta                   | 1,2756  | 3,0128  | 2,3619  | 0,16526184 | 0,00259189 | 0,01400248 |
| Q39232 | AT1G71880.1 | 1  | AFIADLAAGDAK                                                                  | sucrose transport protein SUC1                                   | 1,3767  | 2,8235  | 2,0509  | 0,12191578 | 0,00319329 | 0,02371304 |
| Q39231 | AT1G22710.1 | 2  | EVYGGNSDATATAASK,ASNVPFFGEIFGAFK                                              | sucrose transport protein SUC2                                   | 0,76892 | 0,87787 | 1,1417  | 0,15102512 | 0,24095013 | 0,25837114 |
| Q39228 | AT3G19930.1 | 1  | AGGFVQTPGVR                                                                   | sugar transport protein 4                                        | 1,1005  | 1,4923  | 1,356   | 0,31578971 | 0,06064588 | 0,12294256 |
| P23586 | AT1G11260.1 | 2  | PAGGFVVGDGQK,GVDDVSEQDFDLVAASK                                                | sugar transporter 1                                              | 0,91789 | 0,39984 | 0,37024 | 0,33099788 | 0,00271908 | 0,00824639 |
| Q93Y9P |             |    |                                                                               |                                                                  |         |         |         |            |            |            |

|        |             |    |                                                                                                                                                         |                                                                |         |         |         |            |            |            |
|--------|-------------|----|---------------------------------------------------------------------------------------------------------------------------------------------------------|----------------------------------------------------------------|---------|---------|---------|------------|------------|------------|
| Q9LN91 |             | 1  | I E D I L P F F F D A L I D D F K                                                                                                                       | T12C24.2                                                       | 0,54641 | 1,1935  | 2,1843  | 0,04040215 | 0,18509878 | 0,01919518 |
| Q9MAM6 |             | 5  | E E G L E Y E D M I L G R , Q S T N N T L S L T L , D H V H A L S K , G F G I G P D G R , L P I I F V E N N L W A I G M S H L R , G H S L A D P D I     | T25K16.8                                                       | 0,88173 | 0,61614 | 0,75777 | 0,09951543 | 0,04557805 | 0,33658501 |
| Q5E917 | AT3G20050.1 | 4  | I A C L D F N L Q K , A G A N V I L T K , L I S G S D F F A N L V E A V L S V K , E Q L A E F A D A L L I P K , T L E S N T V A G G S A V E S           |                                                                | 0,85185 | 0,89285 | 1,0892  | 0,08453135 | 0,06353359 | 0,44656466 |
| Q0WR69 | AT5G56500.2 | 1  | D I I S I L E A D K                                                                                                                                     | TCP-1/cpn60 chaperonin family protein                          | 1,0672  | 1,2328  | 1,2166  | 0,33941417 | 0,1854632  | 0,30776669 |
| Q95F16 | AT3G11830.1 | 7  | S D F L V D G V A F K , S Q D S E V G D G T T V V L L A E A F L K , L A I G L A T Q Y F A D R , V A E E D L N R , V A A A A G T V Q T S V N N           | TCP-1/cpn60 chaperonin family protein                          | 1,0178  | 1,1542  | 1,2166  | 0,35171676 | 0,12253519 | 0,10811884 |
| Q9LV21 | AT3G18190.1 | 3  | V V S Q Y T L L A P L A V D A V L S V I D P E K P E I V D L R , G S N Q L V D E A E R , A T C G N V L L I Q K                                           | TCP-1/cpn60 chaperonin family protein                          | 1,0001  | 0,90777 | 0,90769 | 0,49967239 | 0,28672085 | 0,30776669 |
| Q84WV1 | AT5G26360.1 | 1  | V P G G Q F D E S E V L K                                                                                                                               | TCP-1/cpn60 chaperonin family protein                          | 1,0926  | 1,4628  | 1,6206  | 0,30758306 | 0,06786834 | 0,05825722 |
| Q94K05 | AT3G03960.1 | 4  | G T V L I H S A E Q L E N Y A K , T L A D N A G L N A M E I A A L Y T H G S G N T K , Y A E S F E Y P K , N P T N F N V D N V R                         | TCP-1/cpn60 chaperonin family protein                          | 0,84274 | 1,9111  | 2,2677  | 0,22262747 | 0,01878338 | 0,01658271 |
| Q95VU4 | AT4G28770.1 | 1  | D L P Y D P T G E L N S L R                                                                                                                             | Tetraspanin family protein                                     | 1,0848  | 1,1725  | 1,0809  | 0,33667925 | 0,20362871 | 0,33958309 |
| Q9M1E7 | AT3G45600.1 | 2  | A G V L G S L K , I D N D E P A G E A R                                                                                                                 | tetraspanin3                                                   | 0,84561 | 0,69869 | 0,80915 | 0,23526536 | 0,06795903 | 0,16928349 |
| Q85Q06 | AT2G23810.1 | 2  | A G L L D N V K , L G D Y S T W L Q K                                                                                                                   | tetraspanin8                                                   | 1,6125  | 1,2728  | 0,78931 | 0,06347689 | 0,13279871 | 0,15741367 |
| Q9FHY8 | AT5G41950.1 | 1  | A I N L G T V L Y G L A E D T N R                                                                                                                       | tetratricopeptide repeat domain-containing protein             | 0,96123 | 1,2858  | 1,3379  | 0,3847187  | 0,1318416  | 0,12673669 |
| Q8VZM1 | AT1G80410.1 | 5  | V L E A E R P S I S Q L N K , H E D S L V H R , L G A E N P D S H R                                                                                     | tetratricopeptide repeat-containing protein                    | 1,173   | 1,7854  | 1,7272  | 0,172787   | 0,02286788 | 0,01568383 |
| Q9F137 | AT5G48010.2 | 2  | S F L Q D L F W K , S Q I T E N P R                                                                                                                     | thalianol synthase 1                                           | 1,641   | 1,2943  | 0,78868 | 0,0599686  | 0,12420678 | 0,15739971 |
| Q38814 | AT5G54770.1 | 1  | L F N A V A A E D L I V K                                                                                                                               | thiazole biosynthetic enzyme                                   | 0,91422 | 0,48414 | 0,52957 | 0,32488037 | 0,0132838  | 0,03184562 |
| Q94012 | AT5G03880.1 | 1  | Y G D G T V P L S L G A L T A I T A G F A M I G R                                                                                                       | thioredoxin family protein                                     | 1,7903  | 0,23271 | 1,02999 | 0,04306948 | 0,00047295 | 1,94E-05   |
| Q42403 | AT5G42980.1 | 1  | L F N D V F F K , F I A P V F A D L A K                                                                                                                 | thioredoxin H3                                                 | 1,2857  | 1,5344  | 1,2484  | 0,42165346 | 0,0928153  | 0,13180052 |
| Q39241 | AT1G45145.1 | 1  | I D V D E L Q A V A Q E F K                                                                                                                             | thioredoxin M4                                                 | 0,75754 | 1,0225  | 1,3284  | 0,11568153 | 0,31791102 | 0,14369822 |
| Q95EU6 | AT3G15360.1 | 1  | I N T D E S P M T A N R                                                                                                                                 | thioredoxin M44                                                | 0,58728 | 0,948   | 1,7298  | 0,04741018 | 0,24575719 | 0,07359494 |
| Q39242 |             | 1  | F G T I P T F T Y K                                                                                                                                     | Thioredoxin reductase 2                                        | 1,2326  | 1,2616  | 1,0235  | 0,18992425 | 0,13839266 | 0,44412223 |
| Q94C09 |             | 6  | H I Y T S S F F A L G S T D G S V A N E Q N V H N E R , L P V Y G S G T D R , M A L N A A S E G P I I L P V G I F G P G K , L P L I S P P T V T V L     | unknown protein                                                | 1,7983  | 2,4286  | 1,3505  | 0,04306948 | 0,00639157 | 0,12438478 |
| Q23166 | AT4G37200.1 | 1  | E G N E E G N V G R                                                                                                                                     | thioredoxin-like protein HCF164                                | 1,1102  | 1,2118  | 1,0996  | 0,3146579  | 0,17124124 | 0,31082125 |
| Q04630 | AT5G26830.1 | 6  | S I E D L E E F K , E A Q P F E R , N E A S G A L S G L T R , G E V G O Y L E F I D V Y Y K , W P F W I S P R                                           | threonyl-tRNA synthetase                                       | 1,7396  | 1,8202  | 1,1428  | 0,11810843 | 0,00692025 | 0,04671641 |
| Q9M024 | AT5G01500.1 | 1  | T Q S S L T A V V A A A I A T G C Y P L D T I R                                                                                                         | thylakoid ADP-ATP carrier protein                              | 2,2904  | 5,0019  | 2,1839  | 0,01746757 | 0,00025441 | 0,01919518 |
| Q9ZVL6 | AT1G54780.1 | 7  | L V A A I D G Q P D G P G T Y K , A D A F E Y A D Q V L E K , L N F I T V R , W Y P S I E G N N K , E G A I T G P G F A I E A V G E N I L D A T V S     | thylakoid lumen 18.3 kDa protein                               | 1,2604  | 1,6419  | 1,2469  | 0,27231812 | 0,31761073 | 0,38652388 |
| Q0WLK8 |             | 1  | D V I L N L A L S D V E L Q D L I A G A D K                                                                                                             | Thylakoid lumenal 19 kDa protein, chloroplastic                | 2,0873  | 1,218   | 0,58352 | 0,02516926 | 0,16688934 | 0,04581427 |
| Q8LCA1 | AT2G46820.1 | 4  | N L Y F L P D R , T A Q E A W E K , A T T E V G E A P A T T E A E T T E L P E I K                                                                       | thylakoid membrane phosphoprotein                              | 1,72    | 2,5188  | 1,468   | 0,06347689 | 0,00632404 | 0,07791121 |
| Q9M158 | AT4G01050.1 | 6  | Q V D E F L N T K , G W L N S S L P W E I P K , A V S T Y N G E D K P G F L K , L G T D D N A Q L L D R , F D G N S E L V A E L V A L N G F K , A       | thylakoid rhodanese-like protein                               | 1,2998  | 1,6677  | 1,2709  | 0,18621086 | 0,05672548 | 0,18869828 |
| Q9S2B2 | AT4G33350.1 | 1  | V V P I T L D Q V Y L L K                                                                                                                               | Ti22-like protein                                              | 1,3633  | 1,0651  | 0,78125 | 0,12801913 | 0,34358374 | 0,15236678 |
| Q2V409 | AT2G42210.2 | 3  | G S T I G F G A G T I G T I L A T Y K , D F Y N G A I G F V A G A S V L G Y R , S I P T A I A A G A T L A V T S A L I D S G G Q T T R , N V A L P G I   | Tim17 domain-containing protein                                | 1,0244  | 1,0126  | 0,9492  | 0,39151124 | 0,12372323 | 0,17723399 |
| Q9CSW7 | AT1G32400.3 | 1  | T G N F D T Y I N L R                                                                                                                                   | tobamovirus multiplication 2A protein                          | 0,82162 | 1,1495  | 1,3991  | 0,20230136 | 0,22817556 | 0,10738259 |
| Q3E7E9 | AT5G44920.2 | 1  | I A L A I F S K                                                                                                                                         | Toll-Interleukin-Resistance domain-containing protein          | 1,0705  | 1,2483  | 1,166   | 0,36165493 | 0,14624026 | 0,23559881 |
| Q8GXY6 | AT1G05270.1 | 1  | H I S S V A V A G T A I V S G I L L S R                                                                                                                 | Trab-like protein                                              | 3,2381  | 0,32631 | 0,10077 | 0,00444389 | 0,00244126 | 4,87E-06   |
| Q9L1Q5 | AT3G0270.1  | 13 | G Y L Y D G D H C E F G V D V T M P S L Y E K , D R P P S S Y S L K , N D V L M V Q V E M A I S T K , T M W G S F Q L P I D T F K , S W N I I           | TRAF-like family protein                                       | 0,83349 | 1,3029  | 1,556   | 0,20275682 | 0,20835587 | 0,40775179 |
| Q81493 | AT5G26260.1 | 5  | S D Y G V G N N I I M S E L K , Y L S V T D G T Y K , Q L Y S A A W Y P I R , G E P Y E S S I F A A G Y K , G G I N N H S L Y A R , V T F I S N P P     | TRAF-like family protein                                       | 0,63298 | 1,4836  | 2,2147  | 0,03425878 | 0,12620998 | 0,0790075  |
| Q9SG54 | AT1G76080.1 | 2  | D M N V I E P T F L I R , S M S E T V F V A R                                                                                                           | thioredoxin-like protein CDS32                                 | 0,55624 | 0,46211 | 0,83077 | 0,04306948 | 0,01107518 | 0,20167013 |
| P92994 | AT2G30490.1 | 1  | N V V F D I T F G K                                                                                                                                     | trans-cinnamate 4-monooxygenase                                | 1,3467  | 2,0108  | 1,4931  | 0,13337707 | 0,0148253  | 0,08016342 |
| Q9CS57 |             | 3  | N Y N I L A Q I H A S E N S K , S F E Q I E V E R , I E E H L S R                                                                                       | transcription factor APF1                                      | 1,4992  | 2,829   | 2,0111  | 0,18621086 | 0,00341236 | 0,01797573 |
| Q9SK21 | AT2G32080.1 | 2  | L F Y D L K , S I I L P S L G L K , A V T G G G G G G G G S D V E L V S K                                                                               | transcription factor Pur-alpha 1                               | 1,552   | 1,1142  | 0,74811 | 0,09614373 | 0,26260914 | 0,13614308 |
| Q8RRW0 | AT3G60750.1 | 11 | S I T T E L P A G W E K , A L P T Y P E S P G D A T R , T V D K P T L I K , L P H L P G T S I E G V E K , V S I E A A S T F G W G K , S I G I N S F G A | Transketolase                                                  | 0,75957 | 0,73524 | 0,92749 | 0,21936801 | 0,09391219 | 0,25274925 |
| Q38884 | AT2G46280.2 | 2  | L I T S A D Q T A K , I A E D P E E Q D A E S V L V L P C D G K                                                                                         | translation initiation factor 3 subunit I                      | 1,0777  | 1,4122  | 1,3453  | 0,26346102 | 0,13279871 | 0,08876987 |
| P41377 | AT1G54270.1 | 1  | A L D G Y Q V K                                                                                                                                         | translation initiation factor 4A-2                             | 1,3868  | 2,1011  | 1,515   | 0,11932159 | 0,012231   | 0,07647713 |
| Q3E987 | AT5G20920.2 | 2  | S P O T I L K , E N N P E L A G D R                                                                                                                     | translation initiation factor eIF-2 beta subunit               | 0,83238 | 0,76896 | 0,92381 | 0,21404153 | 0,12138972 | 0,33658501 |
| Q9LD55 | AT4G11420.1 | 3  | D R P D L S A P E S L Q L Y D L T R , T V L E I L R , G V L S C A S E Q V K , S A L L S E L V K , I Y Q T I R , D L Q L I A S S V L A A L S I P P F D R | translation initiation factor eIF-3 subunit 10                 | 1,2676  | 1,6964  | 1,456   | 0,10345539 | 0,004953   | 0,03990795 |
| Q9CS22 | AT1G10840.1 | 2  | N F S W M D F I E I P K , V V Q I E G L A V K                                                                                                           | translation initiation factor eIF-3 subunit 3                  | 0,65235 | 1,2309  | 1,8868  | 0,08023104 | 0,15790714 | 0,03184562 |
| Q9CS23 | AT3G57290.1 | 2  | W I V N L I R , Y Q I G P D Q I E A L Y Q A K                                                                                                           | translation initiation factor eIF-3 subunit 6                  | 1,0252  | 1,0528  | 1,0269  | 0,43915522 | 0,36742623 | 0,43784562 |
| Q94160 | AT3G56150.2 | 6  | Y S N I V D D T E P E D N E T S K P T Y D G K , E L L A Q V S Q S R , T L V M L E D F L N E A L A N K , V W G N L V A F L E R , C V L N M I             | translation initiation factor eIF-3 subunit 8                  | 0,959   | 1,4085  | 1,5373  | 0,35339165 | 0,07645503 | 0,13180052 |
| Q93VP3 | AT1G26630.1 | 4  | V D Y Q L I D I T E D G F V S L T D S G G T K , T Y P Q S A G N I R , C H F V A I D I F T A K                                                           | translation initiation factor eIF-5A                           | 0,57058 | 1,2097  | 2,1202  | 0,04661118 | 0,17239492 | 0,02060502 |
| P31265 | AT3G16640.1 | 2  | L S E E D Q A V F K , G F I A Y I K , V V D I V D T F R                                                                                                 | translationally-controlled tumor protein-like protein          | 1,443   | 1,3843  | 1,0334  | 0,15606633 | 0,10082244 | 0,40431654 |
| Q81283 | AT4G02510.1 | 2  | S I R P E A T M D K , S Q G D S A Y G A N L E V R                                                                                                       | translocase of chloroplast 159                                 | 1,2247  | 1,8834  | 1,3852  | 0,30681929 | 0,14149413 | 0,2685707  |
| Q23680 | AT1G02280.2 | 1  | L I P L I G A O Y L I V K                                                                                                                               | translocase of chloroplast 33                                  | 0,95949 | 0,6296  | 0,6556  | 0,40723125 | 0,04450111 | 0,07464304 |
| Q83906 | AT5G05000.3 | 1  | Q V G A I T A F D K                                                                                                                                     | translocase of chloroplast 34                                  | 0,77898 | 0,86994 | 1,1168  | 0,160455   | 0,22817556 | 0,28701334 |
| Q85HU6 | AT2G15290.1 | 1  | S V T V P N S E S V V P K                                                                                                                               | translocon at inner membrane of chloroplasts 21                | 1,262   | 2,0021  | 1,5864  | 0,172787   | 0,01516721 | 0,06399897 |
| Q9K500 | AT2G24820.1 | 9  | S P L V S L P Q W F H H Q A C K , A V L L G S A A L C S A A Y T C L R , V P P V E H A P A G L I A A L S A Y P A K , N V P E D A P L G T                 | translocon at the inner envelope membrane of chloroplasts 55-I | 1,592   | 1,8361  | 1,0772  | 0,13134162 | 0,099675   | 0,49515082 |
| Q94BY3 | AT5G14030.4 | 2  | L D A G G I L S H I E L A K , G V Y G A P A V I T F R                                                                                                   | translocon-associated protein subunit beta                     | 0,92431 | 1,1672  | 1,2234  | 0,42621916 | 0,15247118 | 0,15355836 |
| Q94G00 | AT1G10950.1 | 5  | N W S G A P N N P C R , W G L V G E L G G N L I D S E I A I K , S V I C P L E D E A K , H V L Y T H K , E D D L E S L E R                               | transmembrane nine 1                                           | 1,1183  | 1,5071  | 1,282   | 0,1996738  | 0,03851025 | 0,12852101 |
| Q94A32 | AT3G43520.1 | 1  | A E V E P T I D Y G G G G I G G D K                                                                                                                     | transmembrane protein 14C                                      | 0,60987 | 0,61327 | 0,99523 | 0,06347689 | 0,05462372 | 0,37789765 |
| Q93V66 | AT3G57280.1 | 3  | E S T P E R E D V A T Q I P R , L K P S A T S P S Y , T S K P Y S T V D E T A T N K                                                                     | Transmembrane proteins 14C                                     | 0,90488 | 1,3203  | 1,4591  | 0,31147744 | 0,11216109 | 0,08876987 |
| Q9ZVH7 | AT2G38550.1 | 1  | G P T L D G G E D E S S D G F V R                                                                                                                       | Transmembrane proteins 14C                                     | 0,5046  | 0,75619 | 1,4986  | 0,03194999 | 0,11129187 | 0,07919887 |
| Q23275 |             | 1  | I V A L V G P C T E P G T I I S K                                                                                                                       | transport protein                                              | 0,6198  | 0,71351 | 1,1512  | 0,06347689 | 0,08288761 | 0,24929874 |
| Q8H2D6 |             | 2  | L D F L E I A S Q Q L S A N L N R                                                                                                                       | transportin                                                    | 0,88138 | 1,0178  | 1,137   | 0,22642083 | 0,20080233 | 0,48527501 |
| Q8H0U4 | AT2G16950.2 | 1  | L D F L E I A S Q Q L S A N L N R                                                                                                                       | transportin 1                                                  | 0,67945 | 1,6689  | 2,4562  | 0,09614373 | 0,03426426 | 0,01225561 |
| Q8L751 | AT1G45201.1 | 13 | S F I L Q F W K , I E L D E K , S S A T Y S F G C S D R , T S S T N P D L V V S F R , F V Y N N D V P R , I N V G S I E Y K , E N I S L L H Q Y A Y T I | triacylglycerol lipase-like 1 protein                          | 0,72468 | 1,0632  | 1,8314  | 0,18992425 | 0,11869583 | 0,05963097 |
| Q8L4R0 | AT1G19800.3 | 1  | V L G A D P I D Y L T P R                                                                                                                               | trigalactosyl diacylglycerol 1                                 | 1,5554  | 1,902   | 1,2229  | 0,07507334 | 0,01909412 | 0,18571584 |
| Q9L1R2 | AT3G20320.1 | 2  | N V E S I S S I L G F T G E A T R , S I Y T L V Y T L K                                                                                                 | trigalactosyl diacylglycerol 2                                 | 1,2206  | 1,8098  | 1,4827  | 0,19994416 | 0,02357655 | 0,08303118 |
| Q859L5 | AT5G55220.1 | 2  | V T E T V Q A N S S K , L N E D Q L A S L S S Q , L P G F L D A I G I R                                                                                 | trigger factor type chaperone family protein                   | 1,0287  | 0,77232 | 0,7757  | 0,41601691 | 0,13179251 | 0,17836987 |
| P48491 | AT3G55440.1 | 4  | A I L N E S S E F V G D K , N V S A D V A A T T R , I I Y G G S V G N G C K , S D F V A A Q N C W K , V I A C V G T E L E E R , E A G S T M D V         | triosephosphate isomerase                                      | 1,3613  | 1,3322  | 1,0044  | 0,07253728 | 0,03089351 | 0,33025215 |
| Q9SKP6 | AT2G21170.1 | 2  | A F A D A V P S M D N I V A E Y P W A I G T K , T F D V C F A Q L K                                                                                     | triosephosphate isomerase                                      | 1,3456  | 1,7793  | 1,3223  | 0,13337707 | 0,02539608 | 0,13375719 |
| Q95HJ6 | AT1G06530.1 | 2  | V V A E S E I V E L Q K , T E G E A T A E A E K                                                                                                         | tropomyosin-related protein                                    | 1,2387  | 1,5917  | 1,2521  | 0,47196645 | 0,19996677 | 0,236846   |
| Q80852 | AT2G30860.1 | 2  | Q P A Y L A Q P P G T                                                                                                                                   |                                                                |         |         |         |            |            |            |



|         |             |   |                                                                             |                                                                     |         |         |         |            |            |            |
|---------|-------------|---|-----------------------------------------------------------------------------|---------------------------------------------------------------------|---------|---------|---------|------------|------------|------------|
| Q9LYR3  |             | 3 | GPAPYINLEVPYTSFLEENK,AFAYVLSGGR,LANSVDVGLSR                                 | ubiquinol-cytochrome-c reductase-like protein                       | 1,1695  | 1,7187  | 1,4696  | 0,2365211  | 0,02949463 | 0,08548837 |
| P59Z33  | AT3G62250.1 | 1 | LAVLQFYK                                                                    | ubiquitin-40S ribosomal protein S27a-3                              | 0,83342 | 1,867   | 2,2402  | 0,21554938 | 0,02063113 | 0,01740826 |
| Q9FZ48  | AT1G16890.2 | 2 | SNEAEAVETAK,ICLDILK                                                         | ubiquitin-conjugating enzyme E2 36                                  | 0,57982 | 1,6608  | 3,0504  | 0,08067319 | 0,13262018 | 0,02836906 |
| Q9LM76  | AT1G20780.1 | 1 | VVEAALAAALSLEDGLDVEK                                                        | U-box domain-containing protein 44                                  | 1,0482  | 0,69473 | 0,6628  | 0,39433221 | 0,0731004  | 0,07799316 |
| 8080517 | AT2G44790.1 | 6 | YGSSHTVDVVK,TGVNIFYCSTPGHCR,AGYGDCCASSSTENHSDGDKT                           | uclacyanin 2                                                        | 1,3435  | 1,4259  | 1,1264  | 0,11932159 | 0,08279093 | 0,47008771 |
| Q9G316  | AT3G60280.1 | 1 | VGDTLVEFVGLSHSVVVDK                                                         | uclacyanin 3                                                        | 0,81921 | 0,61328 | 0,74144 | 0,18329251 | 0,00802105 | 0,03363603 |
| 049607  | AT4G34980.1 | 1 | DSGLDSDILAAFDAAR                                                            | subtilisin-like serine protease 2                                   | 1,7715  | 1,8068  | 1,0199  | 0,04550156 | 0,02365712 | 0,45060381 |
| Q9C5H6  | AT3G59360.2 | 1 | NNVLAVPALLYAINNYK                                                           | UDP-galactose transporter 6                                         | 1,1837  | 6,6254  | 5,5974  | 0,22481583 | 4,52E-05   | 0,00012856 |
| 023649  |             | 2 | DFVYLDNVPHDWFPR,MTEIWEALQR                                                  | UDP-glucose:sterol glucosyltransferase                              | 2,4789  | 1,5141  | 0,61079 | 0,0126573  | 0,05630528 | 0,05583941 |
| Q9SX77  | AT1G47420.1 | 4 | VTVLGTSGLSGVYEQR,AAEAVEEFGGILTSK,DLMAADWAELPSAVVK                           | succinate dehydrogenase 5                                           | 1,7168  | 1,9105  | 1,1213  | 0,04572858 | 0,01758657 | 0,31472934 |
| Q9LFX8  | AT1G27090.1 | 2 | SKPAVVLIDELEK,APLSAAVEEISLATQLNR                                            | uncharacterized glycine-rich protein                                | 0,54175 | 1,2297  | 2,27    | 0,0390965  | 0,15817724 | 0,01658271 |
| Q94EG9  | AT1G55910.1 | 1 | TQNDLQLEDK                                                                  | zinc transporter 11                                                 | 1,7651  | 1,7328  | 0,98174 | 0,04575845 | 0,02844818 | 0,45342888 |
| A8MR14  | AT1G64650.2 | 1 | NAASAIASDEK                                                                 | general substrate transporter-like protein                          | 0,56728 | 0,47564 | 0,83847 | 0,04581505 | 0,012231   | 0,21118782 |
| Q94A28  | AT4G26970.1 | 1 | EGVATDLVLTVTQILR                                                            | aconitase 2                                                         | 1,7543  | 2,4212  | 1,3801  | 0,04661118 | 0,00639157 | 0,11443023 |
| Q9M721  | AT3G06850.2 | 1 | FGSPLLNLPEVAIALGR                                                           | 2-oxoisovalerate dehydrogenase E2 component (dihydropyruvate lyase) | 1,7488  | 2,0085  | 1,1485  | 0,04672786 | 0,01489476 | 0,25160888 |
| Q9C5M3  | AT1G78970.2 | 2 | EFVETSIVQALDFR,FVGPITPLILLR                                                 | lupeol synthase 1                                                   | 0,57192 | 0,45729 | 0,79957 | 0,04672786 | 0,01050728 | 0,16664956 |
| Q9ZV49  | AT2G18690.1 | 1 | FSFLNVVK,DVAAILNESR                                                         | uncharacterized protein                                             | 1,815   | 1,6017  | 0,96295 | 0,12245672 | 0,05048437 | 0,27742113 |
| Q9M1X3  | AT3G63160.1 | 1 | SGGEVNFPK                                                                   | uncharacterized protein                                             | 1,7931  | 3,4205  | 1,2423  | 0,08067319 | 0,04514995 | 0,41917244 |
| 049636  | AT4G22310.1 | 1 | WGISIANIADFAKPEPK                                                           | uncharacterized protein                                             | 1,7871  | 3,4205  | 1,914   | 0,04337302 | 0,00142593 | 0,03075562 |
| Q8H0X5  | AT5G15660.1 | 1 | SVNLDEEYGFENPK                                                              | uncharacterized protein                                             | 1,7207  | 2,9726  | 1,7276  | 0,04823352 | 0,00269551 | 0,04475528 |
| Q8LPD7  | AT1G44920.1 | 2 | VALLAGGVDLIALLIFSAGR,SIWVGTPLGIIR                                           | uncharacterized protein                                             | 1,7008  | 1,6044  | 0,9433  | 0,05045175 | 0,04253299 | 0,37232071 |
| Q9C803  | AT1G33490.1 | 1 | ISEPLIQILR                                                                  | uncharacterized protein                                             | 1,6846  | 3,0753  | 1,8255  | 0,0523846  | 0,00243954 | 0,0355902  |
| Q8LDV3  | AT4G13200.1 | 3 | IESTVGEVLSTGK,SVLDAFFLQK,ALAEVINER                                          | uncharacterized protein                                             | 1,604   | 2,1065  | 1,3133  | 0,06440019 | 0,012231   | 0,13614308 |
| Q9LHA3  | AT3G28720.1 | 1 | IPVYFEDTLVQVHHVYGEVK                                                        | uncharacterized protein                                             | 1,5688  | 0,49321 | 0,31439 | 0,07214592 | 0,01434903 | 0,00380368 |
| Q8L9M8  | AT1G33810.1 | 1 | IFTQFPDEGANQAK                                                              | uncharacterized protein                                             | 1,5449  | 1,5535  | 1,0056  | 0,07711156 | 0,04941378 | 0,48558152 |
| Q8S8F1  | AT2G36885.1 | 2 | YSDDIEK,SVFGPVVEIK                                                          | uncharacterized protein                                             | 1,5177  | 3,7543  | 2,5443  | 0,13062538 | 0,00134791 | 0,01050095 |
| Q941A6  | AT1G08480.1 | 3 | LSFFENYTR,FMEWWRER,EAVTFVGTGAALGAVSTAFAAFWK                                 | uncharacterized protein                                             | 1,509   | 1,5431  | 0,974   | 0,08154038 | 0,14986913 | 0,18261312 |
| Q949R9  | AT5G20090.2 | 2 | FAWMVQPR,FOAFLNSPIGPK                                                       | uncharacterized protein                                             | 1,4732  | 1,9397  | 1,3025  | 0,09614373 | 0,14624026 | 0,22275931 |
| Q8LDD3  | AT4G38100.1 | 1 | DGVVAAEEK                                                                   | uncharacterized protein                                             | 1,4665  | 1,4593  | 0,99511 | 0,09785025 | 0,06833032 | 0,48736986 |
| Q9LTX0  | AT3G12650.1 | 1 | DLSALGNETR                                                                  | uncharacterized protein                                             | 1,3926  | 1,5815  | 1,1357  | 0,11867247 | 0,04525952 | 0,26397196 |
| Q8VZM7  | AT5G02940.1 | 1 | ESILLGWR                                                                    | uncharacterized protein                                             | 1,3452  | 1,2831  | 0,95383 | 0,13337707 | 0,12897147 | 0,39385206 |
| Q8RWI0  | AT1G54520.1 | 1 | LAESSDTPGSLSYL,TEATLALLR                                                    | uncharacterized protein                                             | 1,3332  | 1,6657  | 1,2493  | 0,13835208 | 0,03452004 | 0,16725321 |
| Q9ZP24  | AT1G09310.1 | 1 | LVSYGTEVTAIVETGK                                                            | uncharacterized protein                                             | 1,2887  | 0,99265 | 0,79954 | 0,23911415 | 0,46478545 | 0,24654974 |
| Q9FKA5  | AT5G39570.1 | 2 | SEEQEGSYR,SEEQEEGYR                                                         | uncharacterized protein                                             | 1,2857  | 0,61357 | 0,50047 | 0,46625775 | 0,02357655 | 0,03801615 |
| Q8L9R6  | AT1G68680.1 | 2 | FLVPLVAPALPLR                                                               | uncharacterized protein                                             | 1,2571  | 1,6862  | 1,3413  | 0,17669977 | 0,03240953 | 0,12730146 |
| Q9C7F9  | AT1G27930.1 | 1 | LAPANFLVGLGR                                                                | uncharacterized protein                                             | 1,2249  | 1,582   | 1,2916  | 0,19663579 | 0,04523822 | 0,14562255 |
| Q8S8R9  | AT2G34585.1 | 1 | SLNPDYDQDDQVSDSSDVK                                                         | uncharacterized protein                                             | 1,1941  | 1,5337  | 1,3931  | 0,31684455 | 0,05301425 | 0,10920229 |
| Q9S9N6  | AT5G59613.2 | 2 | LFDWPVPFFK,LTAGLTEEDAK                                                      | uncharacterized protein                                             | 1,1755  | 2,6927  | 2,313   | 0,17134952 | 0,00367439 | 0,02006469 |
| Q94C78  | AT3G51140.1 | 1 | VVNFVFER                                                                    | uncharacterized protein                                             | 1,1441  | 1,749   | 1,5287  | 0,26346102 | 0,02701153 | 0,07421815 |
| Q9S791  | AT1G70770.1 | 5 | IDPLNLEAFVSEASYASQPEIQLMR,ALSGVSVQFPVWK,DUILQVLEK,EVALAGAPGSK,LAGEGNPVIAK   | uncharacterized protein                                             | 1,1418  | 1,8446  | 1,6231  | 0,19251025 | 0,01891449 | 0,07005629 |
| 082251  | AT2G47840.1 | 4 | VISIASYALFFNSLQYGR,LGLLFEPIFINLNR,FLFAQYPR                                  | uncharacterized protein                                             | 1,1353  | 2,7703  | 2,4402  | 0,274315   | 0          | 0,01957823 |
| Q9S2V4  | AT4G30010.1 | 1 | VTELPGYIK                                                                   | uncharacterized protein                                             | 1,1342  | 2,4587  | 2,1679  | 0,27549839 | 0,00614667 | 0,01957823 |
| Q9M898  | AT3G02420.1 | 2 | FALIPILCR,YAPFLNTPVSAVQR                                                    | uncharacterized protein                                             | 1,0997  | 1,8656  | 1,6964  | 0,31679829 | 0,02063113 | 0,04763299 |
| Q9FM77  | AT5G55610.1 | 1 | TASEDDDFLNAAEENR                                                            | uncharacterized protein                                             | 1,067   | 1,4339  | 1,3439  | 0,36464091 | 0,07432637 | 0,1272131  |
| Q9C9Z2  | AT3G08640.1 | 2 | YQTLNIEFLIQA,VAADPQPFK                                                      | uncharacterized protein                                             | 1,0628  | 1,9728  | 1,8562  | 0,37157152 | 0,01649625 | 0,03345105 |
| Q9FF91  | AT5G23890.1 | 1 | GAAADVEEQTVQVSDK                                                            | uncharacterized protein                                             | 1,0547  | 2,1331  | 2,0226  | 0,38437408 | 0,01174781 | 0,02490532 |
| Q8VYR8  | AT2G43630.1 | 1 | AIINTPTWYDSPEK                                                              | uncharacterized protein                                             | 1,0538  | 1,3696  | 1,2997  | 0,3847187  | 0,09314922 | 0,14359696 |
| Q38842  | AT4G00860.1 | 1 | LFGGTTPGTITNK                                                               | uncharacterized protein                                             | 1,0394  | 2,1236  | 2,0431  | 0,4109947  | 0,01183842 | 0,02416558 |
| Q9SU27  | AT4G12590.1 | 2 | GLFSLLGDENAIIDDTR,DGLDIHQHEWALPR                                            | uncharacterized protein                                             | 1,0277  | 1,5358  | 1,5927  | 0,46382572 | 0,07226174 | 0,09959821 |
| Q9M729  | AT3G44330.1 | 5 | IFADSSLAVPFPIVVR,LFVSLVSNPK,GLDDLSLFR,IASPTTNIQWGLPLGR,NDALGQQAATTGGYK,QLVI | uncharacterized protein                                             | 1,0115  | 1,254   | 1,2173  | 0,31077465 | 0,16441248 | 0,30423363 |
| Q8RWK3  | AT3G19340.1 | 2 | LGVARL,TIQEPTFDR                                                            | uncharacterized protein                                             | 0,99169 | 0,80457 | 0,81176 | 0,47999997 | 0,14940749 | 0,17723399 |
| Q8L604  | AT1G65230.1 | 1 | SILAASVDGLK                                                                 | uncharacterized protein                                             | 0,98463 | 0,49427 | 0,50199 | 0,46022159 | 0,01452618 | 0,02638708 |
| Q9FG71  | AT5G55940.1 | 2 | EPSAMVLSDYISEK,YFQAPAILLNK                                                  | uncharacterized protein                                             | 0,93314 | 1,3281  | 1,4059  | 0,3847187  | 0,10576311 | 0,10404583 |
| Q9LYG2  | AT5G11680.1 | 1 | EGCGTGVPLFLNLSVRR                                                           | uncharacterized protein                                             | 0,89743 | 1,0726  | 1,1952  | 0,29970228 | 0,3296146  | 0,20888524 |
| Q9Z111  | AT5G37360.1 | 4 | FGELQAVTPEK,LEPELEILLTDGAR,AWEQADTSTSR,LDLNDAAFDLSNGPVIDECGQELGETLLNLSR     | uncharacterized protein                                             | 0,86662 | 0,70713 | 0,81596 | 0,2523643  | 0,0791647  | 0,18336206 |
| Q0WM9M  | AT1G09330.1 | 2 | FESLDQESLAR,WVWNEINDLGSVVK                                                  | uncharacterized protein                                             | 0,86314 | 0,92791 | 1,075   | 0,24687717 | 0,32290855 | 0,34841671 |
| Q94F20  | AT5G25460.1 | 1 | GSMVVEAFAGK                                                                 | uncharacterized protein                                             | 0,8549  | 0,36093 | 0,4222  | 0,23646531 | 0,00332527 | 0,01398742 |
| Q9SFB1  | AT3G08030.1 | 2 | VPHTSVGGGHVK                                                                | uncharacterized protein                                             | 0,7933  | 1,1422  | 1,4771  | 0,10664388 | 0,19358982 | 0,04731124 |
| Q8GX81  | AT2G17695.3 | 1 | EVLPMVMLPLQVVYVDESR                                                         | uncharacterized protein                                             | 0,76193 | 1,1275  | 1,4798  | 0,14602554 | 0,25408752 | 0,08318031 |
| Q8GXK1  | AT4G33625.1 | 2 | TEEIEYSPAGPSSGSAK,ADPELVVCR                                                 | uncharacterized protein                                             | 0,75856 | 0,5843  | 0,77028 | 0,14408762 | 0,03036783 | 0,14369822 |
| Q9M2Y6  | AT3G49720.2 | 2 | VTGDYSCAEVQR,SFSLVIVSDALDYLSPK                                              | uncharacterized protein                                             | 0,74224 | 1,1888  | 1,6016  | 0,13337707 | 0,18932684 | 0,06076306 |
| Q8LARO  | AT4G2460.2  | 1 | NDDFSSLCPGVDDVK                                                             | uncharacterized protein                                             | 0,74175 | 0,55733 | 0,75137 | 0,13337707 | 0,02440769 | 0,13010259 |
| Q8GSG8  | AT5G01010.1 | 1 | YLVGVPOVLLDFIR                                                              | uncharacterized protein                                             | 0,74085 | 1,0188  | 1,3752  | 0,13264411 | 0,44591935 | 0,11577586 |
| 080503  | AT2G44640.1 | 4 | SPISADVFGSACTYFQK,IVAWYSPK,EGNTEEDKPVFLPYLRL,NLFIQQQVAGVPIVK                | uncharacterized protein                                             | 0,73167 | 0,84582 | 1,156   | 0,1268856  | 0,19494297 | 0,24386858 |
| Q9FF88  | AT5G23920.1 | 1 | IFALLDWWK                                                                   | uncharacterized protein                                             | 0,71812 | 0,89783 | 1,1022  | 0,10942681 | 0,0428636  | 0,27837031 |
| Q93X11  | AT5G55960.1 | 2 | TLSLTVDSQAR,VFSSASVGGGAK                                                    | uncharacterized protein                                             | 0,63592 | 0,81003 | 1,2738  | 0,07142542 | 0,15530305 | 0,15452229 |
| Q84W12  | AT4G16450.2 | 1 | VVGNFSTLDYLR                                                                | uncharacterized protein                                             | 0,58881 | 0,46477 | 0,78934 | 0,05070211 | 0,01126596 | 0,15741367 |
| Q8W553  | AT5G35180.1 | 1 | TIPYALLQVAGLK                                                               | uncharacterized protein                                             | 0,57569 | 0,68273 | 1,1859  | 0,04754354 | 0,06741156 | 0,21703109 |
| Q9XW3   | AT1G13930.3 | 1 | VVAEAAQAAR                                                                  | uncharacterized protein                                             | 0,53415 | 0,47264 | 1,018   | 0,04700634 | 0,01758657 | 0,29405411 |
| Q9LFW3  | AT1G27030.1 | 1 | LVAEVLVDLSPESQGIIR                                                          | uncharacterized protein                                             | 0,52108 | 0,79569 | 1,527   | 0,03514917 | 0,14149413 | 0,07439308 |
| Q7Y1W1  | AT5G01590.1 | 1 | QFLGLWGR                                                                    | uncharacterized protein                                             | 0,44757 | 1,83    | 0,4889  | 0,01908925 | 0,02244204 | 0,0008235  |
| Q9ZU97  | AT2G01690.1 | 1 | IEALNWISTLNNK                                                               | uncharacterized protein                                             | 0,36285 | 1,0444  | 2,8784  | 0,00736139 | 0,3845941  | 0,00626206 |
| Q9LYE7  | AT5G11420.1 | 2 | AIPSWELSGFVEYIK,ESAIQAQAR                                                   | uncharacterized protein                                             | 0,36003 | 0,2067  | 0,57718 | 0,00630893 | 0,00025441 | 0,04995516 |
| Q38845  | AT1G25490.1 | 3 | DSTIEHLPFLSLK,ILPVIWFSQDK,LAIEVYPLASQLGIFGDDK,ENDLSEVFPVVK                  | serine/threonine-protein phosphatase 2A regulatory subunit A a      | 1,1601  | 0,79348 | 0,95857 | 0,04741018 | 0,02515116 | 0,44200572 |
| 081845  | AT3G54110.1 | 8 | DFVGDVPLK,NAINAELASDYQVK,ALWTLGPNVNR,ILAGLTTGALGMVANPTDLVK,IPGFTDNNVTH      | uncoupling mitochondrial protein 1                                  | 1,5568  | 1,7493  | 1,1227  | 0,06252003 | 0,02151949 | 0,26059071 |
| Q9M328  | AT3G53990.1 | 2 | HIMGSVSSVFIQHPVTVVK,SGSPLIAEFR                                              | universal stress protein (USP) family protein                       | 2,0188  | 1,082   | 0,53595 | 0,02909831 | 0,31597334 | 0,03307014 |
| Q9M0X9  | AT4G05160.1 | 2 | GFDLPVVLSGK,IIISVNLFLDK                                                     | 4-coumarate-CoA ligase-like 7                                       | 1,7386  | 1,8537  | 1,0662  | 0,04741018 | 0,02119669 | 0,36371306 |
| Q8LGO9  |             | 1 | ILLSNFGLDLE                                                                 | unknown                                                             | 1,5146  | 1,5214  | 1,0044  | 0,08361268 | 0,05501971 | 0,48836072 |
| Q8LFF4  |             | 1 | ELPLALNAFEVLLDFPNK                                                          | unknown                                                             | 1,2053  | 1,3999  | 1,1368  | 0,2218635  | 0,14538159 | 0,38489721 |
| Q8LBF2  |             | 2 | WAVLYSASLLK,ISNQQQNLTR                                                      | unknown</                                                           |         |         |         |            |            |            |

|         |             |    |                                                                                  |                                                                      |         |         |         |            |            |            |
|---------|-------------|----|----------------------------------------------------------------------------------|----------------------------------------------------------------------|---------|---------|---------|------------|------------|------------|
| Q941L3  | AT5G61900.3 | 1  | LDEQQQLGEATCALSEIITK                                                             | calcium-dependent phospholipid-binding copine-like protein           | 1,7347  | 2,3296  | 1,3429  | 0,04768595 | 0,00774231 | 0,12730146 |
| Q8LEK2  |             | 1  | DCCAGFGQVIR                                                                      | unknown                                                              | 0,50342 | 1,099   | 2,183   | 0,03198338 | 0,29070864 | 0,01919518 |
| Q22126  | AT2G45470.1 | 2  | TFANLLVSSGVLK,FDLTSTSDGEVILHTGVAPSR,TVSEYAEK,LTQAEVSVLLEYHALAEYKPK               | FASCICLIN-like arabinogalactan protein 8                             | 0,87579 | 0,53196 | 0,6925  | 0,04803632 | 0,01107518 | 0,16725321 |
| Q9ZV47  | AT1G16880.1 | 2  | ALIKPLQQLVANSLR                                                                  | uridylyltransferase-related protein                                  | 0,5611  | 0,43187 | 0,74684 | 0,04823352 | 0,00802364 | 0,12852101 |
| Q93VA8  | AT1G76010.1 | 1  | TVTIVELIK                                                                        | Alba DNA/RNA-binding protein                                         | 1,7247  | 1,6361  | 0,94866 | 0,04823352 | 0,03811548 | 0,38201671 |
| Q8GXZ8  |             | 5  | LISNLSTNSVSSTS,AASTSSSPVASGDR,FTSFFGNPAIVEGK,ESCATPILQTR,SAPILQLIR               | unknown protein                                                      | 1,5334  | 2,0004  | 1,3046  | 0,08023104 | 0,01518455 | 0,14080386 |
| Q941K9  |             | 6  | DLIAAGATAANQLR,FQNFIR,AGGIPDIPEDEQEK,GVDSSEFNPR,AADLTLPVSAAGK,VPLSLALSFR         | unknown protein                                                      | 1,5264  | 1,687   | 1,1032  | 0,06266339 | 0,01909412 | 0,22896149 |
| Q67ZP4  |             | 1  | TLGLVLLR                                                                         | unknown protein                                                      | 1,2786  | 1,2501  | 0,97908 | 0,16254974 | 0,14419946 | 0,4460835  |
| O80821  | AT2G41470.1 | 1  | DVCYLYLR                                                                         | unknown protein                                                      | 1,1128  | 0,65935 | 0,5925  | 0,30160883 | 0,05574351 | 0,04854766 |
| Q9S5F3  |             | 3  | QSLYVAVGAGFFPSPDFR,FQLTATLPR,FTVTTTINYNTGSQSVVK                                  | unknown protein                                                      | 1,0721  | 1,0504  | 0,97981 | 0,35896271 | 0,37274531 | 0,4497903  |
| Q8L7P2  |             | 2  | NTALSEVR,LLGLHK                                                                  | unknown protein                                                      | 1,0214  | 1,3262  | 1,2984  | 0,44797159 | 0,10986489 | 0,14369822 |
| Q67Y15  |             | 1  | DVCYLYLR                                                                         | unknown protein                                                      | 0,88578 | 0,78367 | 0,88472 | 0,28320985 | 0,1318416  | 0,27044118 |
| Q9M5K4  | AT4G16155.1 | 6  | VDSPASVTAQSVK,ALGVLDITGFGAVLGPQK,LAVHAHPTLSEVVDLFC,ALAEENEGELAK,QGVADHASN        | unknown protein                                                      | 0,78714 | 0,75147 | 0,99008 | 0,24243794 | 0,14939195 | 0,35736084 |
| Q8RW9N  | AT3G13930.1 | 6  | VEKPASAPEAK,IFASPLAR,ISVNDLVIK,ADVEDFLASGSK,VPALDYVDIPHTQIR,VIDGAIGAEVWK         | dihydrodipolyllysine-residue acetyltransferase component 2 of py     | 1,7859  | 2,337   | 1,3526  | 0,04823352 | 0,00335257 | 0,05963097 |
| Q9FHN0  |             | 1  | VYYPVFTFSVLFVAGTITAYGVLK                                                         | unnamed protein product                                              | 1,8278  | 0,64874 | 0,35493 | 0,04044006 | 0,05154991 | 0,00661528 |
| Q9FR6   |             | 1  | AAELSLGLAAGTLQGSLSNVLAKG                                                         | unnamed protein product                                              | 1,2843  | 2,0214  | 1,5739  | 0,16029952 | 0,01456931 | 0,0659409  |
| Q9FH68  |             | 2  | LIILTFDR,SEDGAVLNPTDQVLASK                                                       | unnamed protein product                                              | 0,86833 | 0,92258 | 1,0549  | 0,26113057 | 0,28356771 | 0,41453009 |
| Q9FNL3  |             | 1  | SFLNQLLGR                                                                        | unnamed protein product                                              | 0,7684  | 0,86255 | 1,1299  | 0,15102512 | 0,22601448 | 0,27044118 |
| Q9LU53  |             | 1  | ALALLLEIFQR                                                                      | unnamed protein product                                              | 0,59199 | 0,9032  | 1,5257  | 0,05198642 | 0,2794562  | 0,07461162 |
| Q31ERW2 | AT5G19550.1 | 3  | VFNLAGLSVEYFR,EYIPVIGSDFNPK,VTVVQLCSGTGSLR                                       | aspartate aminotransferase                                           | 1,7205  | 2,192   | 1,2741  | 0,04823352 | 0,01046927 | 0,1545229  |
| Q9S680  | AT3G10740.1 | 1  | DAGTSLASLALAEAAFLGLEK                                                            | alpha-L-arabinofuranosidase 1                                        | 0,58384 | 0,56406 | 0,96613 | 0,0492606  | 0,0257728  | 0,42018922 |
| Q49048  | AT1G77140.1 | 1  | VVDGIAAFLAK                                                                      | vacuolar protein sorting-associated protein 45-like protein          | 0,59528 | 1,1887  | 1,9969  | 0,05277604 | 0,18932684 | 0,02638708 |
| P93026  | AT3G52850.1 | 1  | LPTFVLDR                                                                         | vacuolar-sorting receptor 1                                          | 0,91838 | 1,234   | 1,3186  | 0,33667925 | 0,21001488 | 0,1580139  |
| Q9SH90  |             | 4  | LVTMQFLPSPMYK,FSGIASESVVSEK,DDGFFQLAK,LSSHLEK                                    | unknown protein                                                      | 1,7123  | 1,8655  | 1,0894  | 0,0492606  | 0,02063113 | 0,32531804 |
| Q9ZRD6  | AT5G58060.1 | 1  | SAFSLNQLVDEYQK                                                                   | VAMP-like protein YKT61                                              | 0,55452 | 0,67777 | 1,2223  | 0,04293598 | 0,06404894 | 0,18622741 |
| Q8LC74  |             | 1  | SATVENLEAGYHSWNLLLR                                                              | vegetative storage protein-like                                      | 0,82062 | 0,79065 | 0,96347 | 0,20119711 | 0,13666172 | 0,4147151  |
| Q8LAZ1  |             | 1  | ANITTIQPLVPAEQQLLFTSLIGR                                                         | very-long-chain fatty acid condensing enzyme CUT1                    | 0,85721 | 1,4413  | 1,6813  | 0,23930232 | 0,07262151 | 0,04946517 |
| Q9M003  | AT3G60600.1 | 2  | QISCSLITNK,FLQGVASPGVTAK                                                         | vesicle associated protein                                           | 0,52567 | 0,75289 | 1,4322  | 0,03609131 | 0,10904609 | 0,09745137 |
| Q9ZTW3  | AT1G04750.1 | 1  | GNFTSIAAQCLQK                                                                    | vesicle-associated membrane protein 721                              | 1,0121  | 0,9647  | 0,95319 | 0,46816001 | 0,40150829 | 0,39247935 |
| Q9M0Y8  | AT4G04910.1 | 4  | DNIALNAIQR,LLEFIAIGPR,ITMEDFLHAIYEQVAFGASTDGLER,FSNIIQSITMLVLLK                  | vesicle-fusing ATPase                                                | 0,97167 | 1,5238  | 1,6512  | 0,2547768  | 0,02644344 | 0,02474635 |
| Q9X817  | AT1G14000.1 | 1  | GGLTPTTAVNFALDIAR                                                                | VH1-interacting kinase                                               | 0,80043 | 0,93885 | 1,1729  | 0,18059715 | 0,34358374 | 0,22914484 |
| O80910  | AT2G38410.1 | 1  | VQLLALTLLETLVK                                                                   | VHS and GAT domain-containing protein                                | 0,85774 | 1,1717  | 1,356   | 0,23258573 | 0,32795148 | 0,15909481 |
| Q9FX3   | AT5G67500.1 | 12 | FSISTYSAGVALTSTALK,FSTNENTITVGGVLAIDHSTAVK,ITDSSVLTVTLEILPSTK,YNAGISVTKPDACL     | voltage dependent anion channel 2                                    | 1,4076  | 1,7962  | 1,2455  | 0,09040669 | 0,02050831 | 0,16366213 |
| Q9FKM2  | AT5G57490.1 | 3  | LGALALAKP,GQNTIVDLK,DDFFGDISTLYK                                                 | voltage dependent anion channel 4                                    | 1,0953  | 1,684   | 1,5375  | 0,3231144  | 0,03258199 | 0,07263455 |
| P59227  | AT4G38920.1 | 1  | SGVGVASMGVMRPELVMK                                                               | V-type H <sup>+</sup> -transporting ATPase 16kDa proteolipid subunit | 1,1932  | 1,1031  | 0,92448 | 0,21902323 | 0,28455228 | 0,33799488 |
| Q9SJT7  | AT2G21410.1 | 4  | CLVGEWSPVFAATEIQDALHR,FTTAQFQIYDAYGVAK,QSVIESSVDPNSGEK                           | V-type H <sup>+</sup> -transporting ATPase subunit I                 | 1,0196  | 0,82589 | 0,81004 | 0,45267591 | 0,17190195 | 0,17667834 |
| Q8W454  | AT4G39080.1 | 11 | LGLEAEALVEINANNKIQ,QAQMITEVSGR,FTSAIQEIVDAYGVAK,NILLQTIGDK,FAPFTTIFANEDE,TTIDA   | V-type H <sup>+</sup> -transporting ATPase subunit I                 | 0,84745 | 0,82696 | 0,9862  | 0,36417609 | 0,44488957 | 0,32764524 |
| Q23654  | AT1G78900.2 | 26 | VNSNDVAVVYGGCGER,EASITYGTITAEYFR,EDDLNIVQLVGGK,ITYIAPAGQVSLK,LTTTFEDEK,NIHFYNLAI | V-type proton ATPase catalytic subunit A                             | 1,0097  | 0,93121 | 0,91031 | 0,29581586 | 0,32979842 | 0,40734824 |
| P11574  | AT1G76030.1 | 2  | FTTVQFTEVKL,TVSGVAGPLVILDK                                                       | V-type proton ATPase subunit B1                                      | 1,0506  | 1,2319  | 1,1726  | 0,39110214 | 0,1572751  | 0,2293484  |
| Q9S2N1  | AT4G38510.4 | 2  | TVSGVAGPLVILEK,FVAQGYADTR                                                        | V-type proton ATPase subunit B2                                      | 1,1645  | 1,4264  | 1,2187  | 0,2166652  | 0,03794099 | 0,11842417 |
| Q3ED91  | AT1G20260.1 | 3  | FVMQGYADTR,FTTVQFTEVKL,TVSGVAGPLVILDK                                            | V-type proton ATPase subunit B3                                      | 1,3401  | 0,92781 | 0,70662 | 0,18917409 | 0,32702643 | 0,13180052 |
| Q9SD57  | AT1G12840.1 | 10 | DSASSLWNR,LVDDQESLR,EVVDNIQSQVAK,VGTLDSLALGDDLLK,DFEQSVSEAEQTR,LCDSTNSLYWK,      | V-type proton ATPase subunit C                                       | 0,95073 | 1,1244  | 1,2006  | 0,41555899 | 0,10904609 | 0,15236678 |
| Q0WWD3  | AT3G58730.1 | 5  | LENTISYK,NDLTGLAR,TENIAGVK,GELDELR,VNALENVVKPK                                   | V-type proton ATPase subunit D                                       | 1,251   | 1,2664  | 1,0123  | 0,17906573 | 0,13614272 | 0,46848158 |
| Q9LJ15  | AT3G28710.1 | 5  | AYLEDFYK,LYSNFGLLYPYGHEELAICEDIDQVR,AGLLTTADYNNLCQENLDDIK,AVNITINSIGTELTR,LGG    | V-type proton ATPase subunit d1                                      | 1,042   | 1,0308  | 0,9892  | 0,40683029 | 0,4144451  | 0,47209125 |
| Q9LHA4  | AT3G28715.1 | 1  | AYLEDFYFNCFQK                                                                    | V-type proton ATPase subunit d2                                      | 1,2935  | 1,1837  | 0,91511 | 0,15509285 | 0,19358982 | 0,32052402 |
| Q39258  | AT4G11150.1 | 4  | ANEISVSAEEFNIEK,VLQAOQDDIVNAMK,DLNLSNR,SNDPGLHCGSGVVLASR,LDAVFR,IVCENTLDAR       | V-type proton ATPase subunit E1                                      | 1,294   | 1,4487  | 1,1181  | 0,15554632 | 0,0553681  | 0,22684353 |
| Q9ZQX4  | AT4G02620.1 | 4  | FLVDSYNKVP,PAILEIPSK,DDIAILLSQYIANMIR,YLFAESVSGR                                 | V-type proton ATPase subunit F                                       | 0,94243 | 1,5267  | 1,6199  | 0,37451204 | 0,05405697 | 0,05825772 |
| O82628  | AT3G01390.2 | 2  | DVVEMLLK,AQTEQDFQR                                                               | V-type proton ATPase subunit G1                                      | 1,6419  | 1,9263  | 1,1732  | 0,0599686  | 0,01800598 | 0,22896149 |
| Q9S063  | AT3G48000.1 | 6  | AGTVVWVNCFDVFDAAIFPGYK,VILGLAANSNPKVPTLELGGK,AVVTALNKPAWI,SPFIVFEDADIDK,TGEI     | aldehyde dehydrogenase 2B4                                           | 1,7102  | 2,0569  | 1,2027  | 0,04954348 | 0,01354858 | 0,20220305 |
| Q9S1L9  | AT2G36870.1 | 1  | EHFLVDPIR                                                                        | xyloglucan:xyloglucosyl transferase                                  | 1,5321  | 0,78485 | 0,51226 | 0,08032741 | 0,13246774 | 0,02815539 |
| Q8LER3  | AT4G37800.1 | 7  | DFDIEGCPVPGPADCPANSK,APFYAYYK,DFHEYAISWNHLR,LDPSSGCGFASK,VNLFWDFPSR,FQPMGVY      | xyloglucan:xyloglucosyl transferase                                  | 0,73775 | 0,79534 | 1,0946  | 0,14557629 | 0,12620598 | 0,45253267 |
| Q8LFA4  |             | 1  | GTGGDPDFGAATK                                                                    | xylose isomerase                                                     | 0,79602 | 0,50087 | 0,62921 | 0,17677818 | 0,01531517 | 0,06355894 |
| P56786  | ATCG01280.1 | 1  | IFSILLR                                                                          | Ycf2                                                                 | 1,2059  | 2,078   | 1,7232  | 0,21184587 | 0,01280421 | 0,04504245 |
| ABY758  |             | 1  | EADVDDGGQINVEEFVK                                                                | Z-box binding factor 3                                               | 1,3156  | 1,0505  | 0,79671 | 0,14408762 | 0,45887369 | 0,12852101 |
| Q9FGC7  | AT5G67030.1 | 1  | YEGDLLVGADGIWSK                                                                  | zeaxanthin epoxidase (ZEP) (ABA1)                                    | 1,0439  | 0,83768 | 0,80247 | 0,40306264 | 0,18496683 | 0,16978186 |
| Q9S1L0  |             | 1  | YGPFLADLQGCDFVR                                                                  | Unknown protein                                                      | 0,5859  | 0,58113 | 0,99186 | 0,04967535 | 0,02942552 | 0,48024433 |
| Q9LW57  | AT3G23400.1 | 7  | LPDSFRPSSNPTGDFEFTYVDOTMR,DFDNIAEVELGAPWFPFPLEATLAHK,FELLGCTK,GLVASVDDU          | putative plastid-lipid-associated protein 6                          | 1,4798  | 1,6173  | 1,0824  | 0,04967535 | 0,03674982 | 0,4195237  |
